# Supplementary material for: Stereoselective Synthesis of Selenium-Containing Glycoconjugates via the Mitsunobu Reaction
Source: MDPI journal article supplement (doi:10.3390/molecules26092541), 2021-04-27

# **Stereoselective Synthesis of Polyphenol-Based Selenium-Containing Glycoconjugates *via* the Mitsunobu Reaction**

*Luigia Serpico<sup>1</sup>, Mauro De Nisco<sup>2,\*</sup>, Flavio Cermola<sup>1</sup>, Michele Manfra<sup>2</sup>, and  
Silvana Pedatella<sup>1</sup>*

## **Supporting Information**

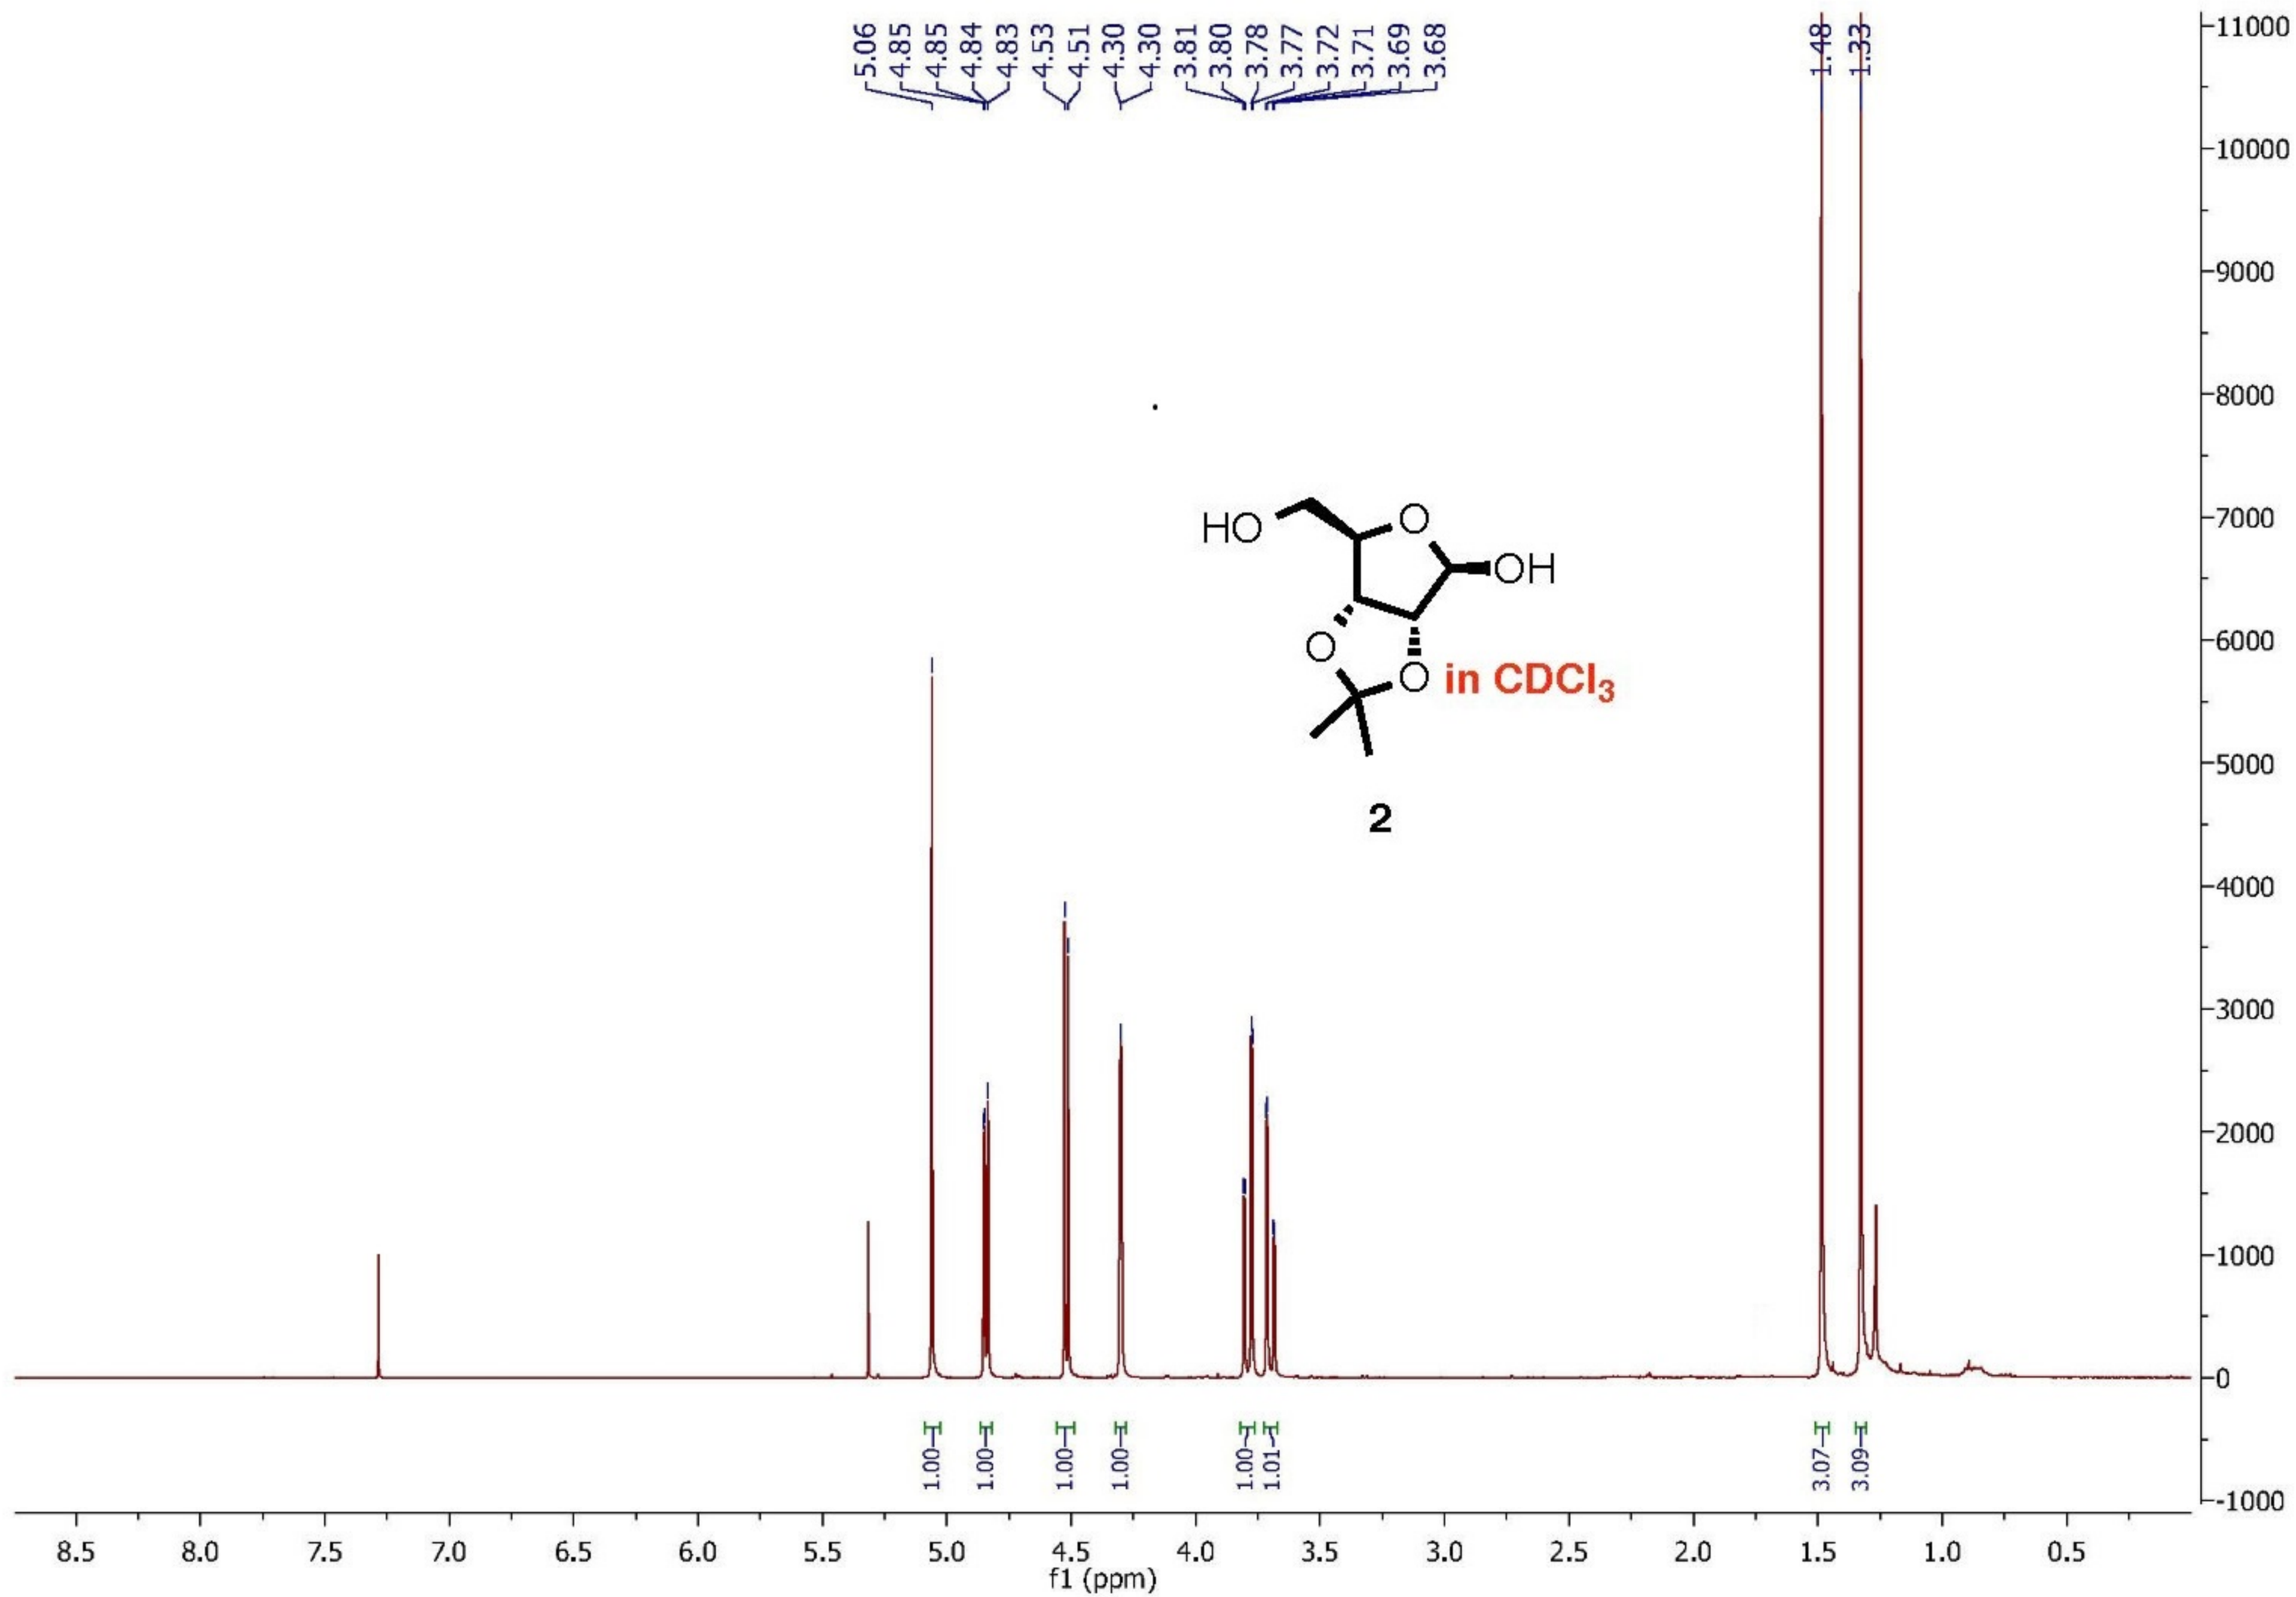

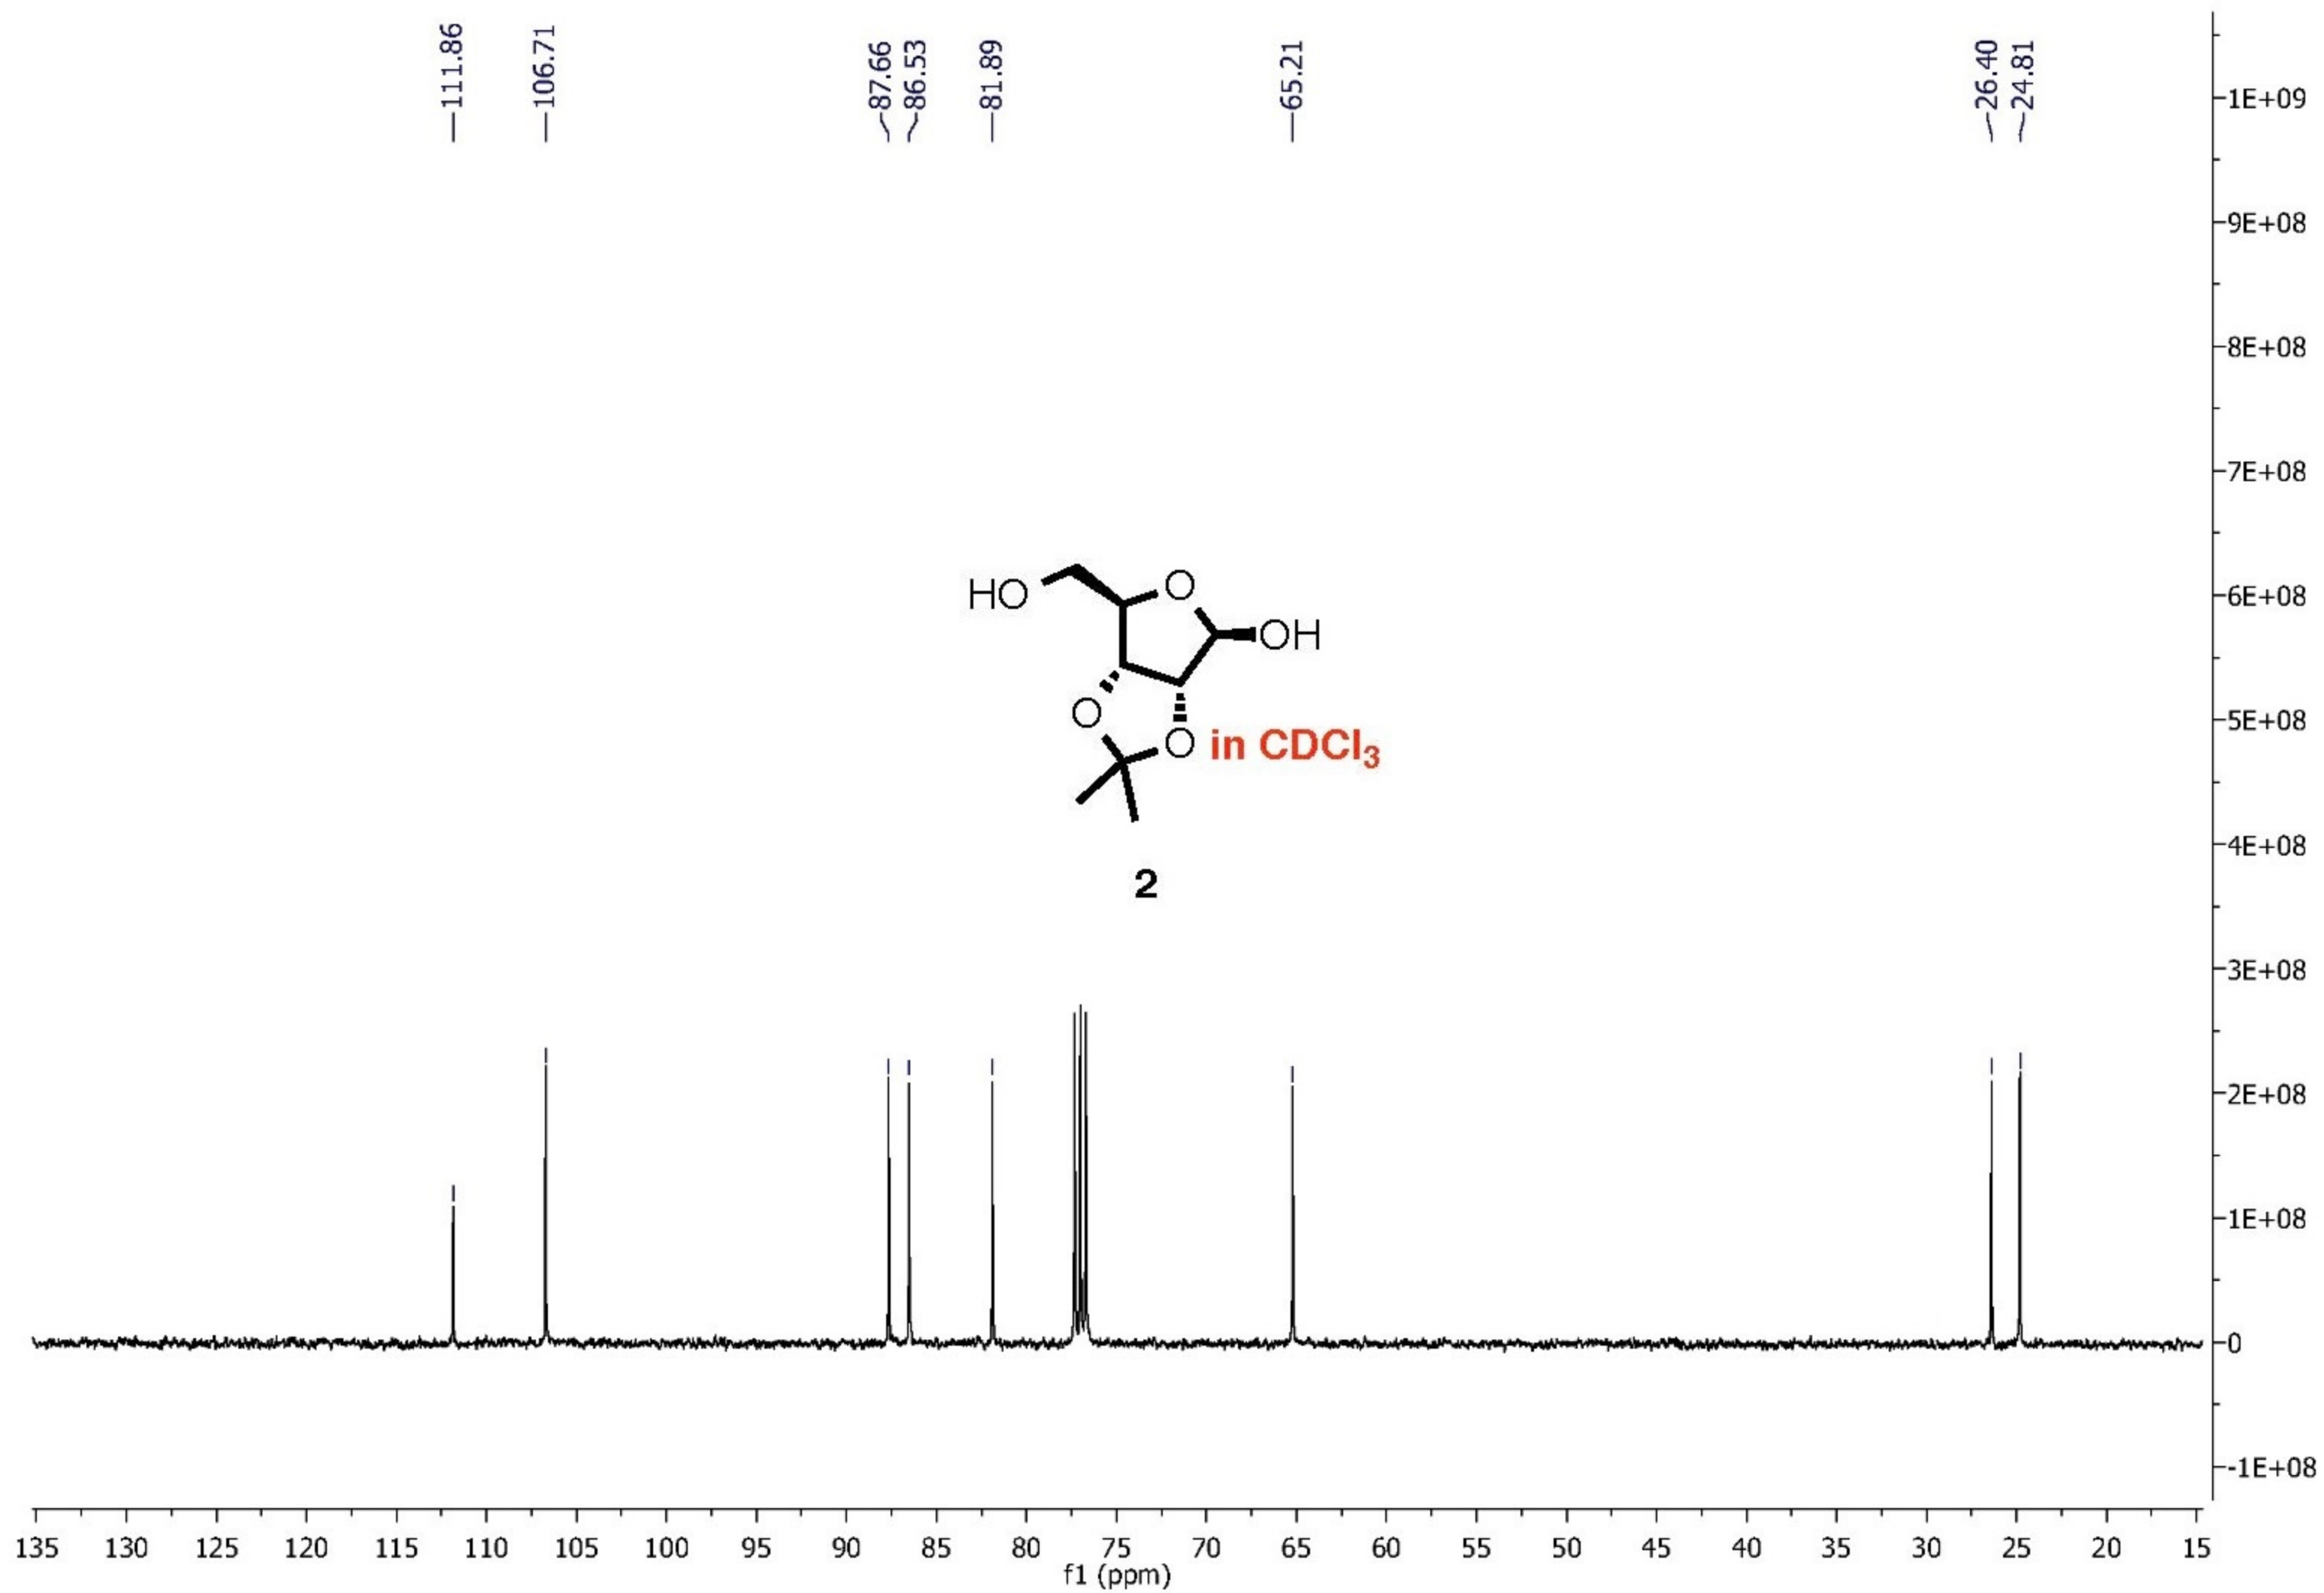

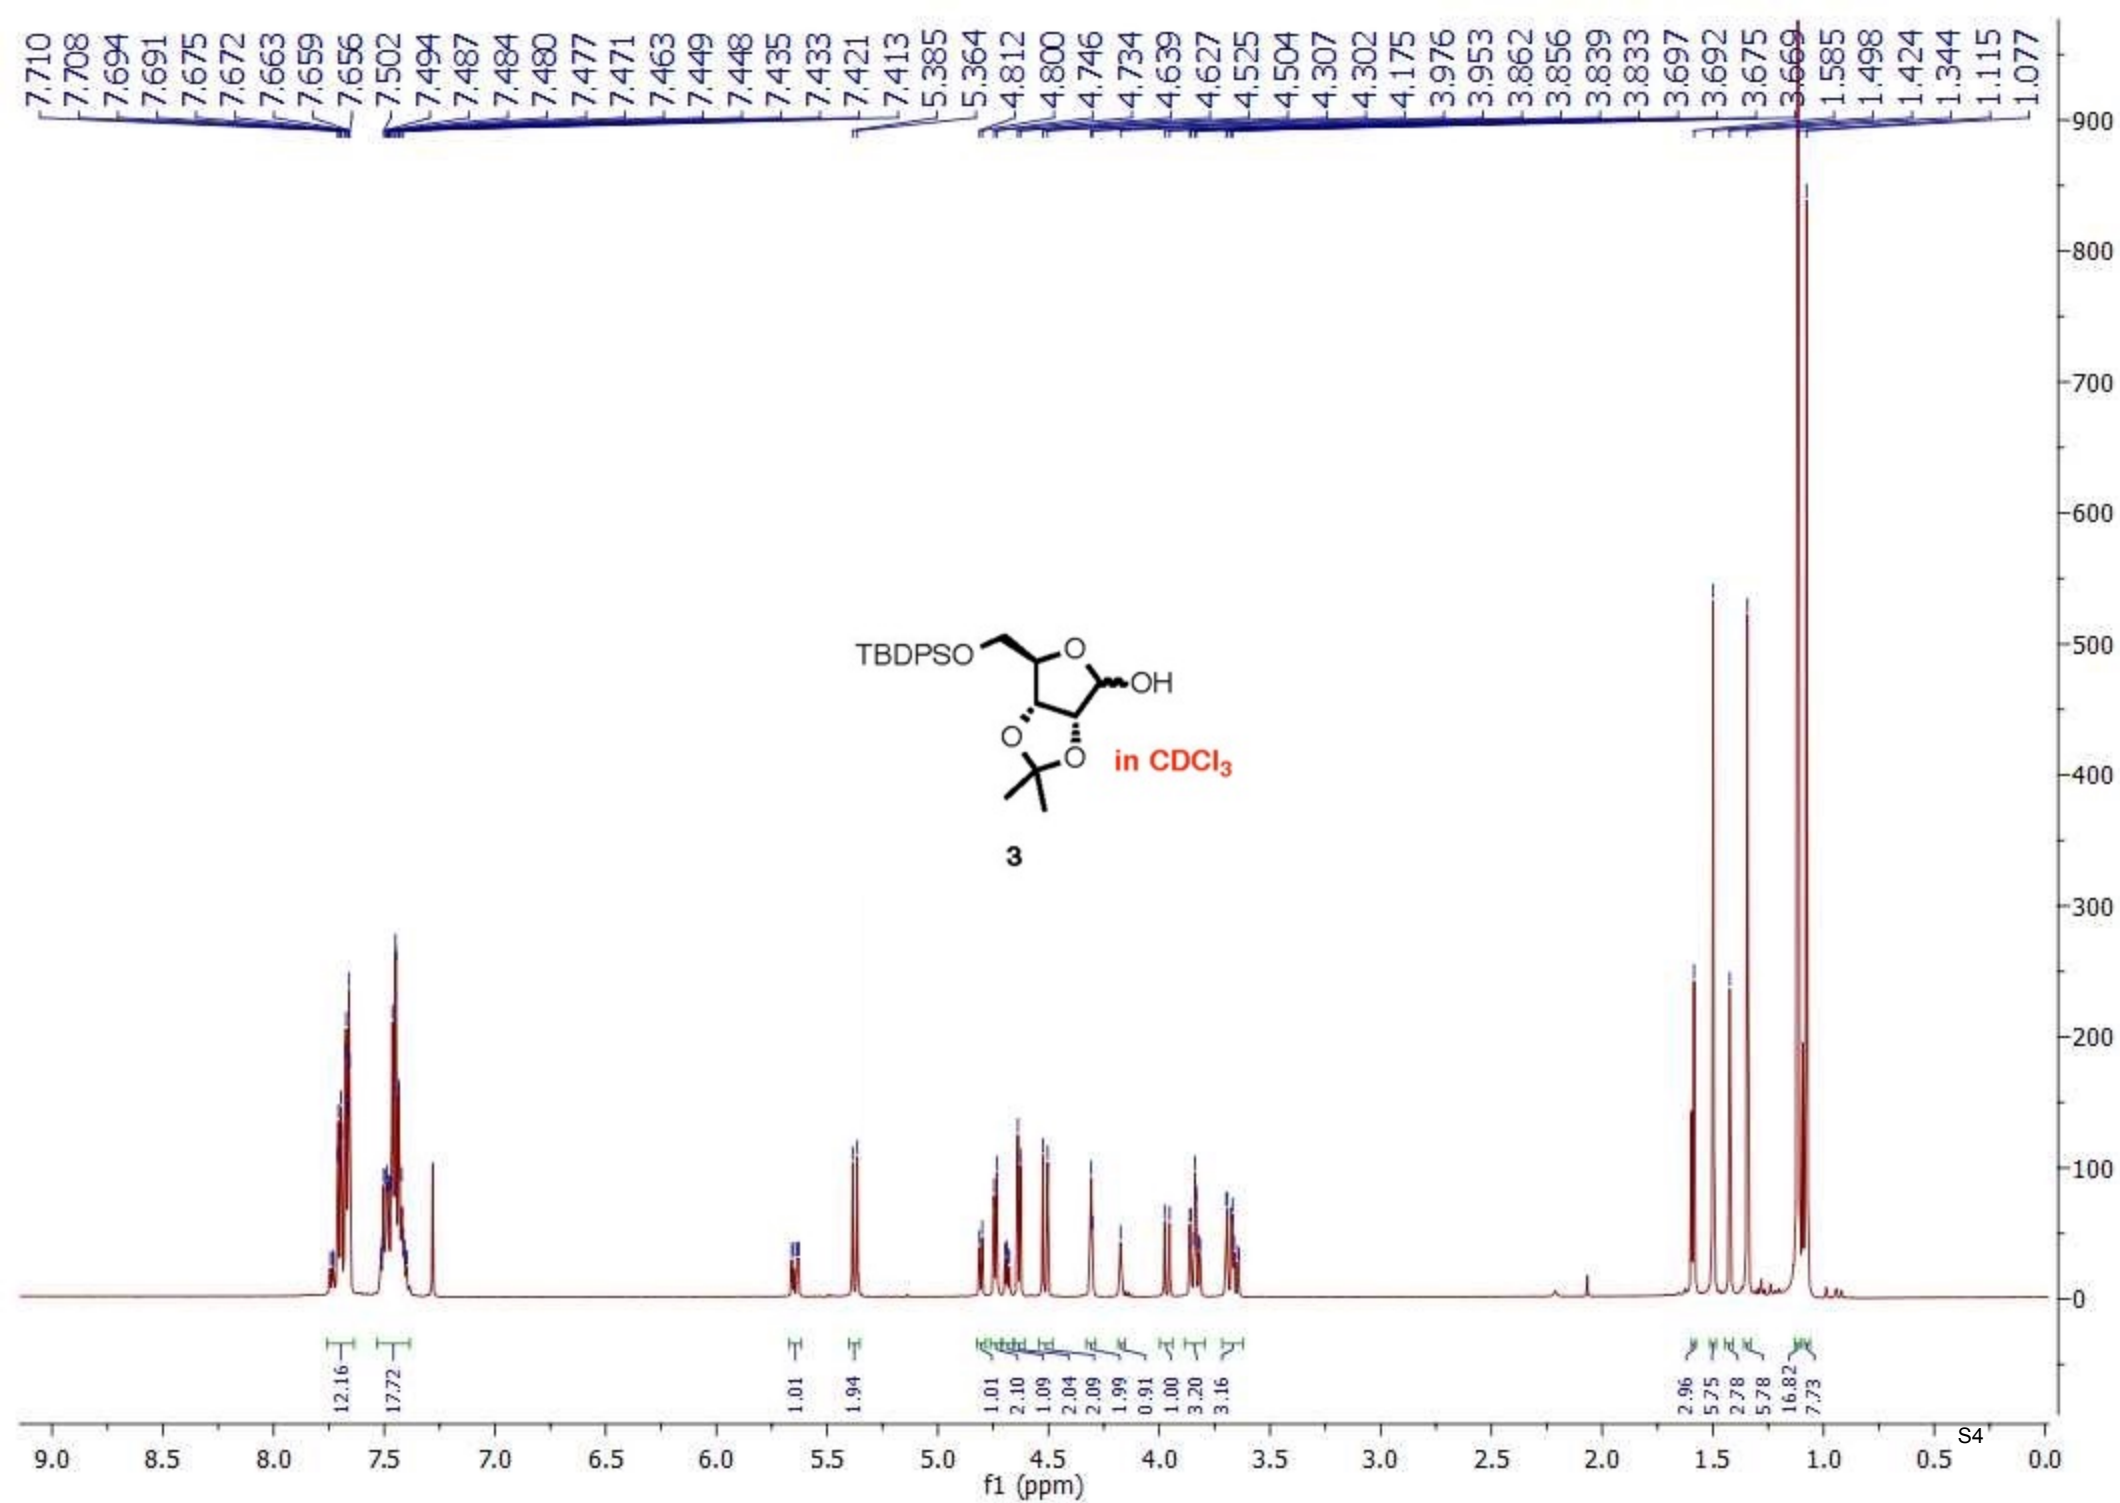



Sample Name  
Date collected

Pulse sequence **CARBON**  
Solvent **cdcl3**

Temperature **25**  
Spectrometer **inova500-inova500**

Study owner **cts**  
Operator **cts**

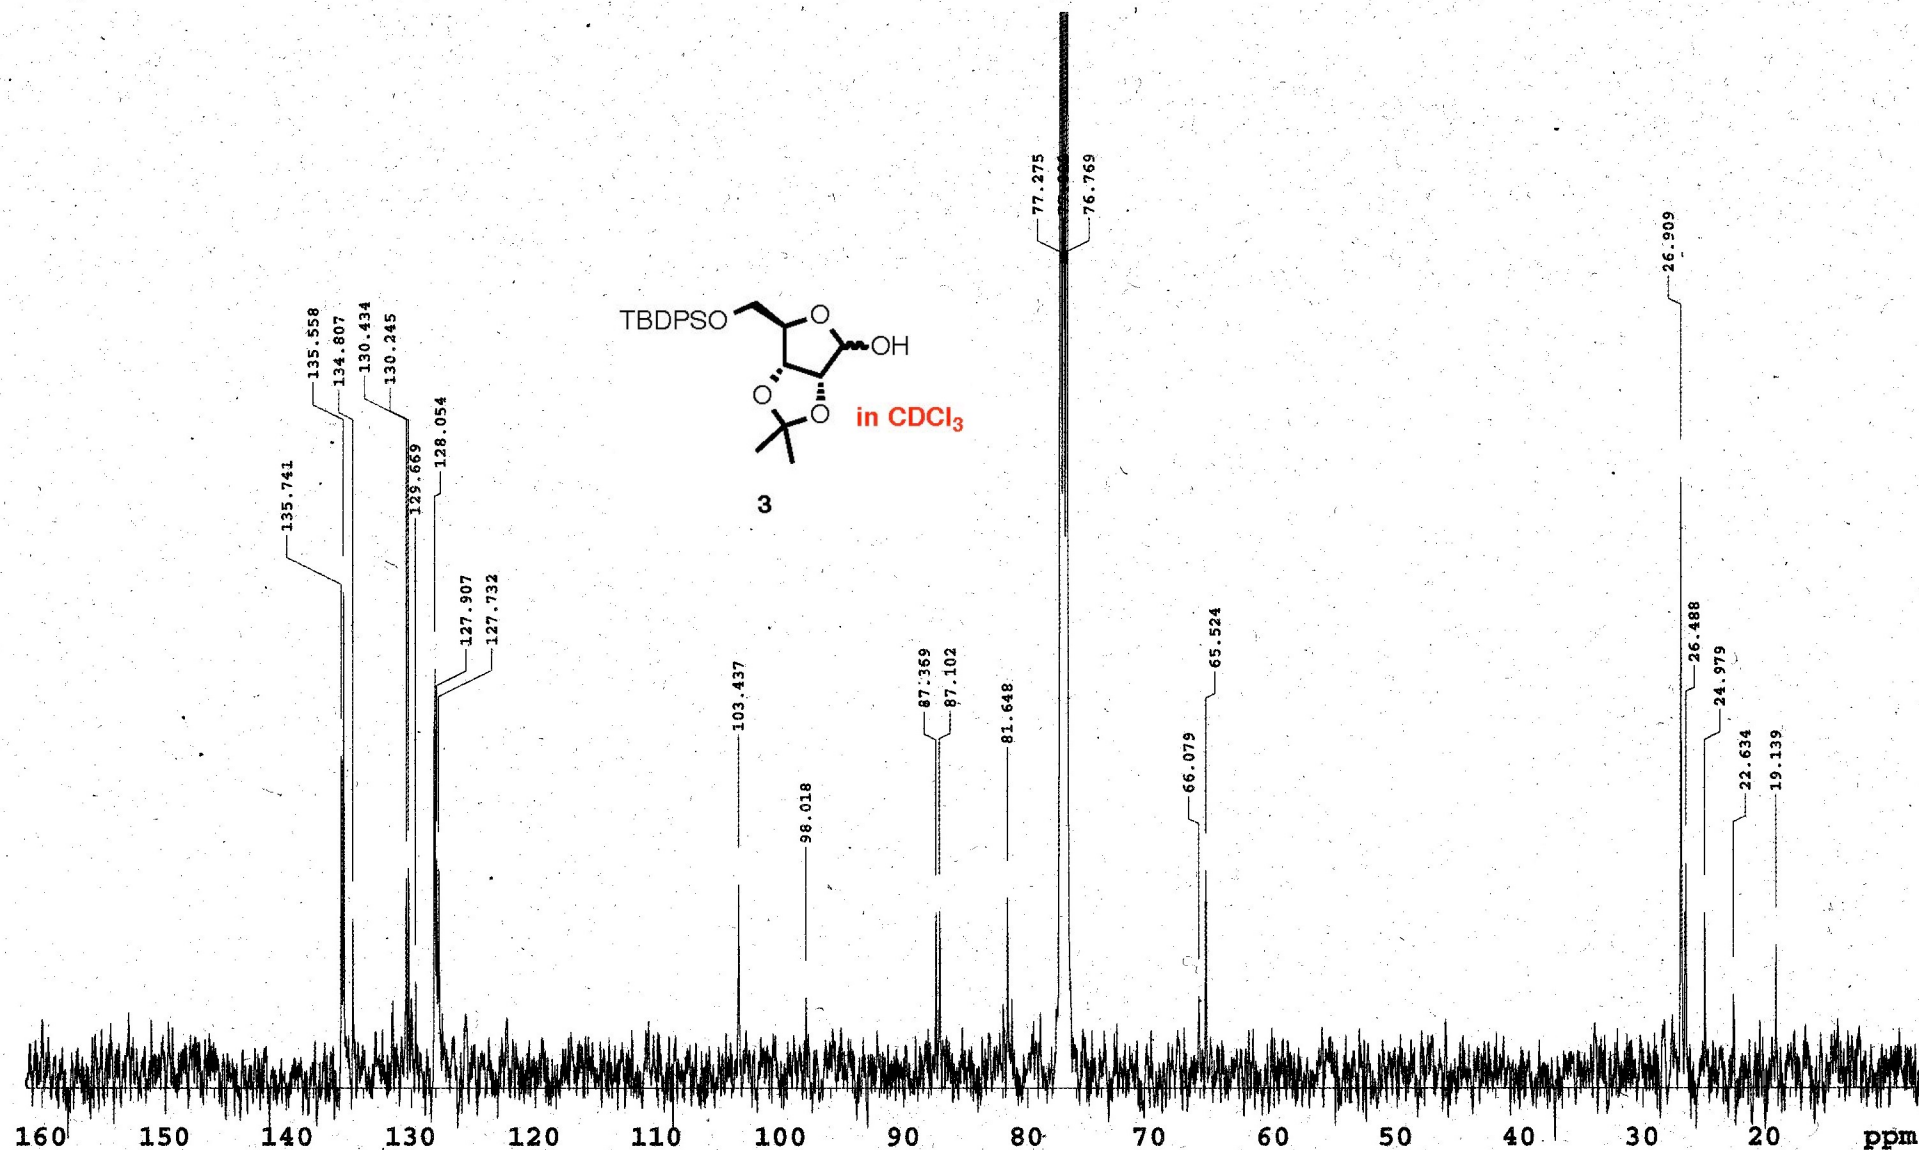

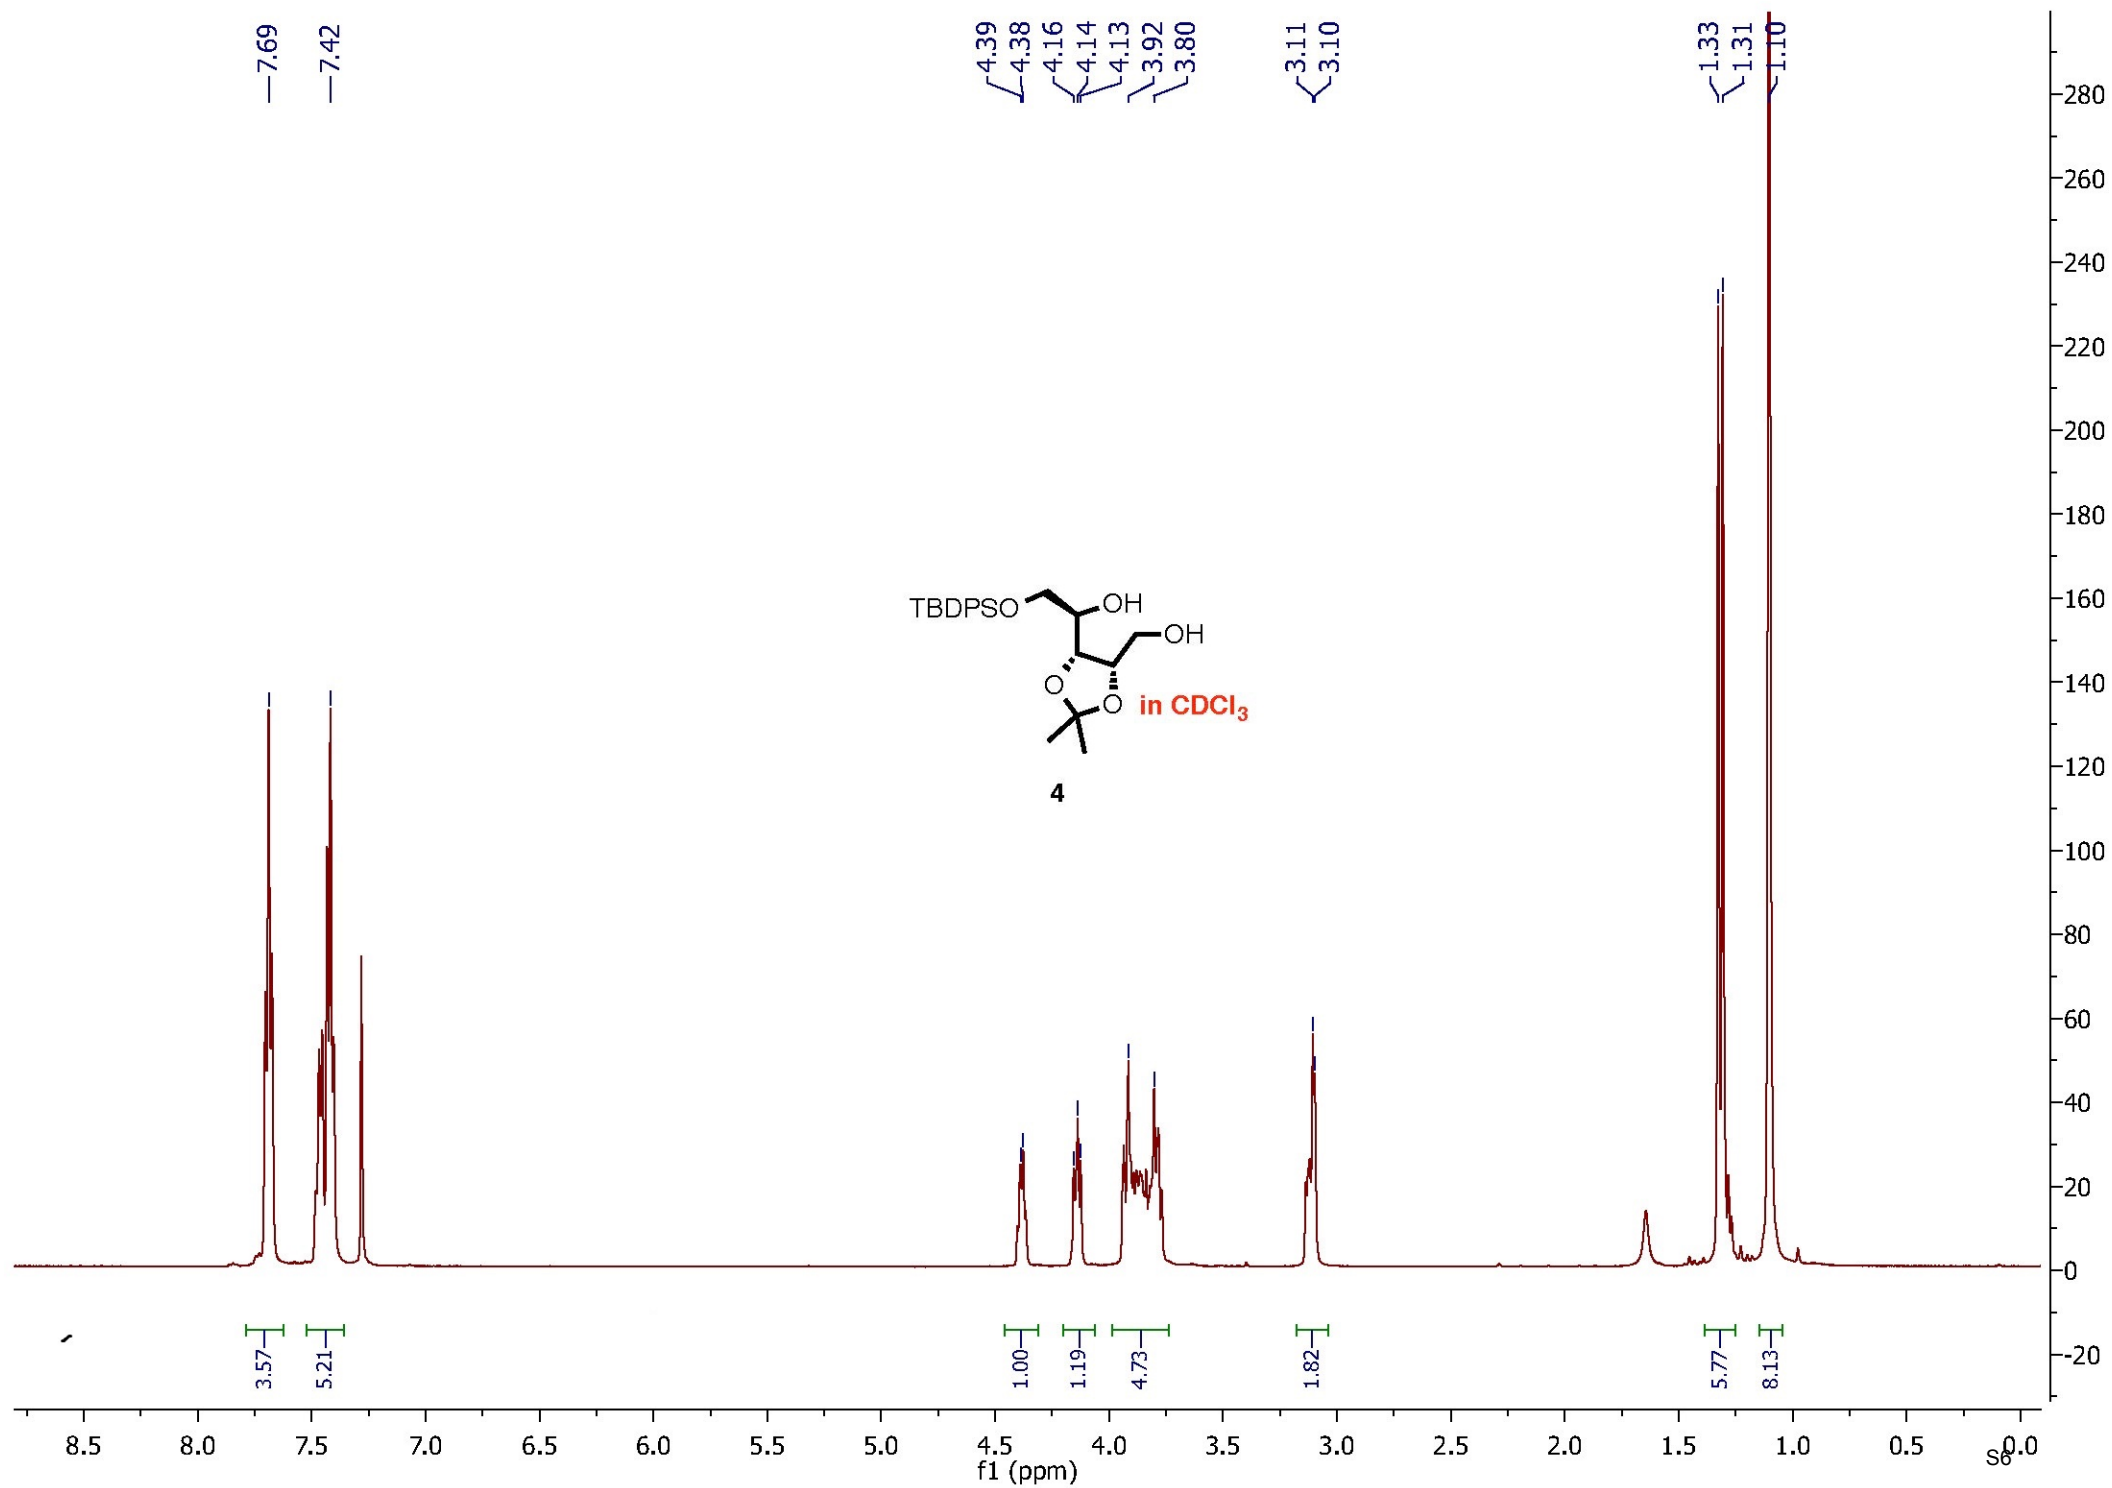

Study owner: **cts**  
Operator: **cts**

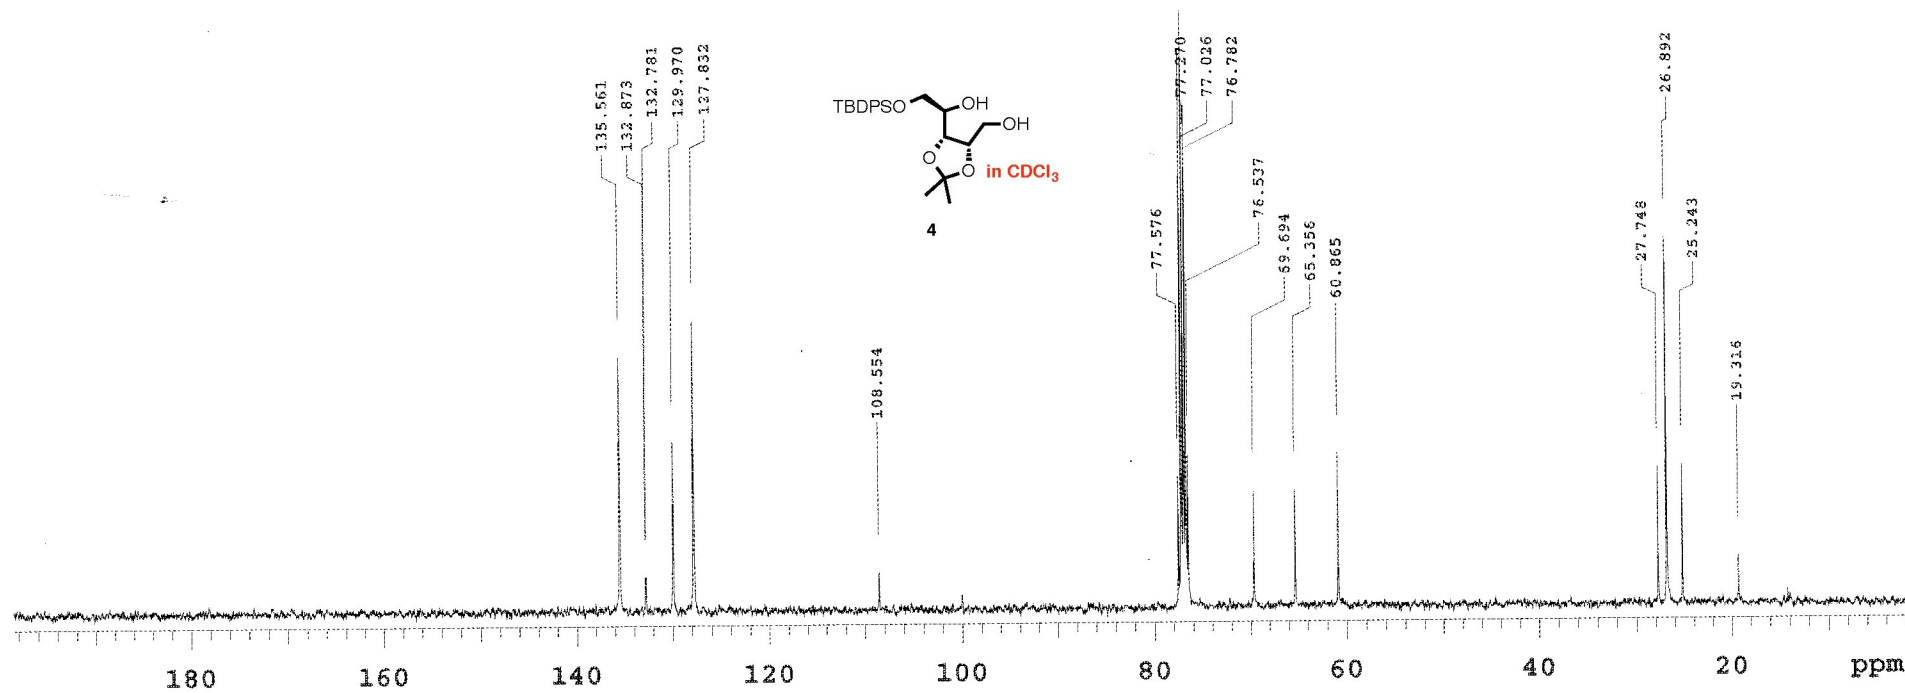



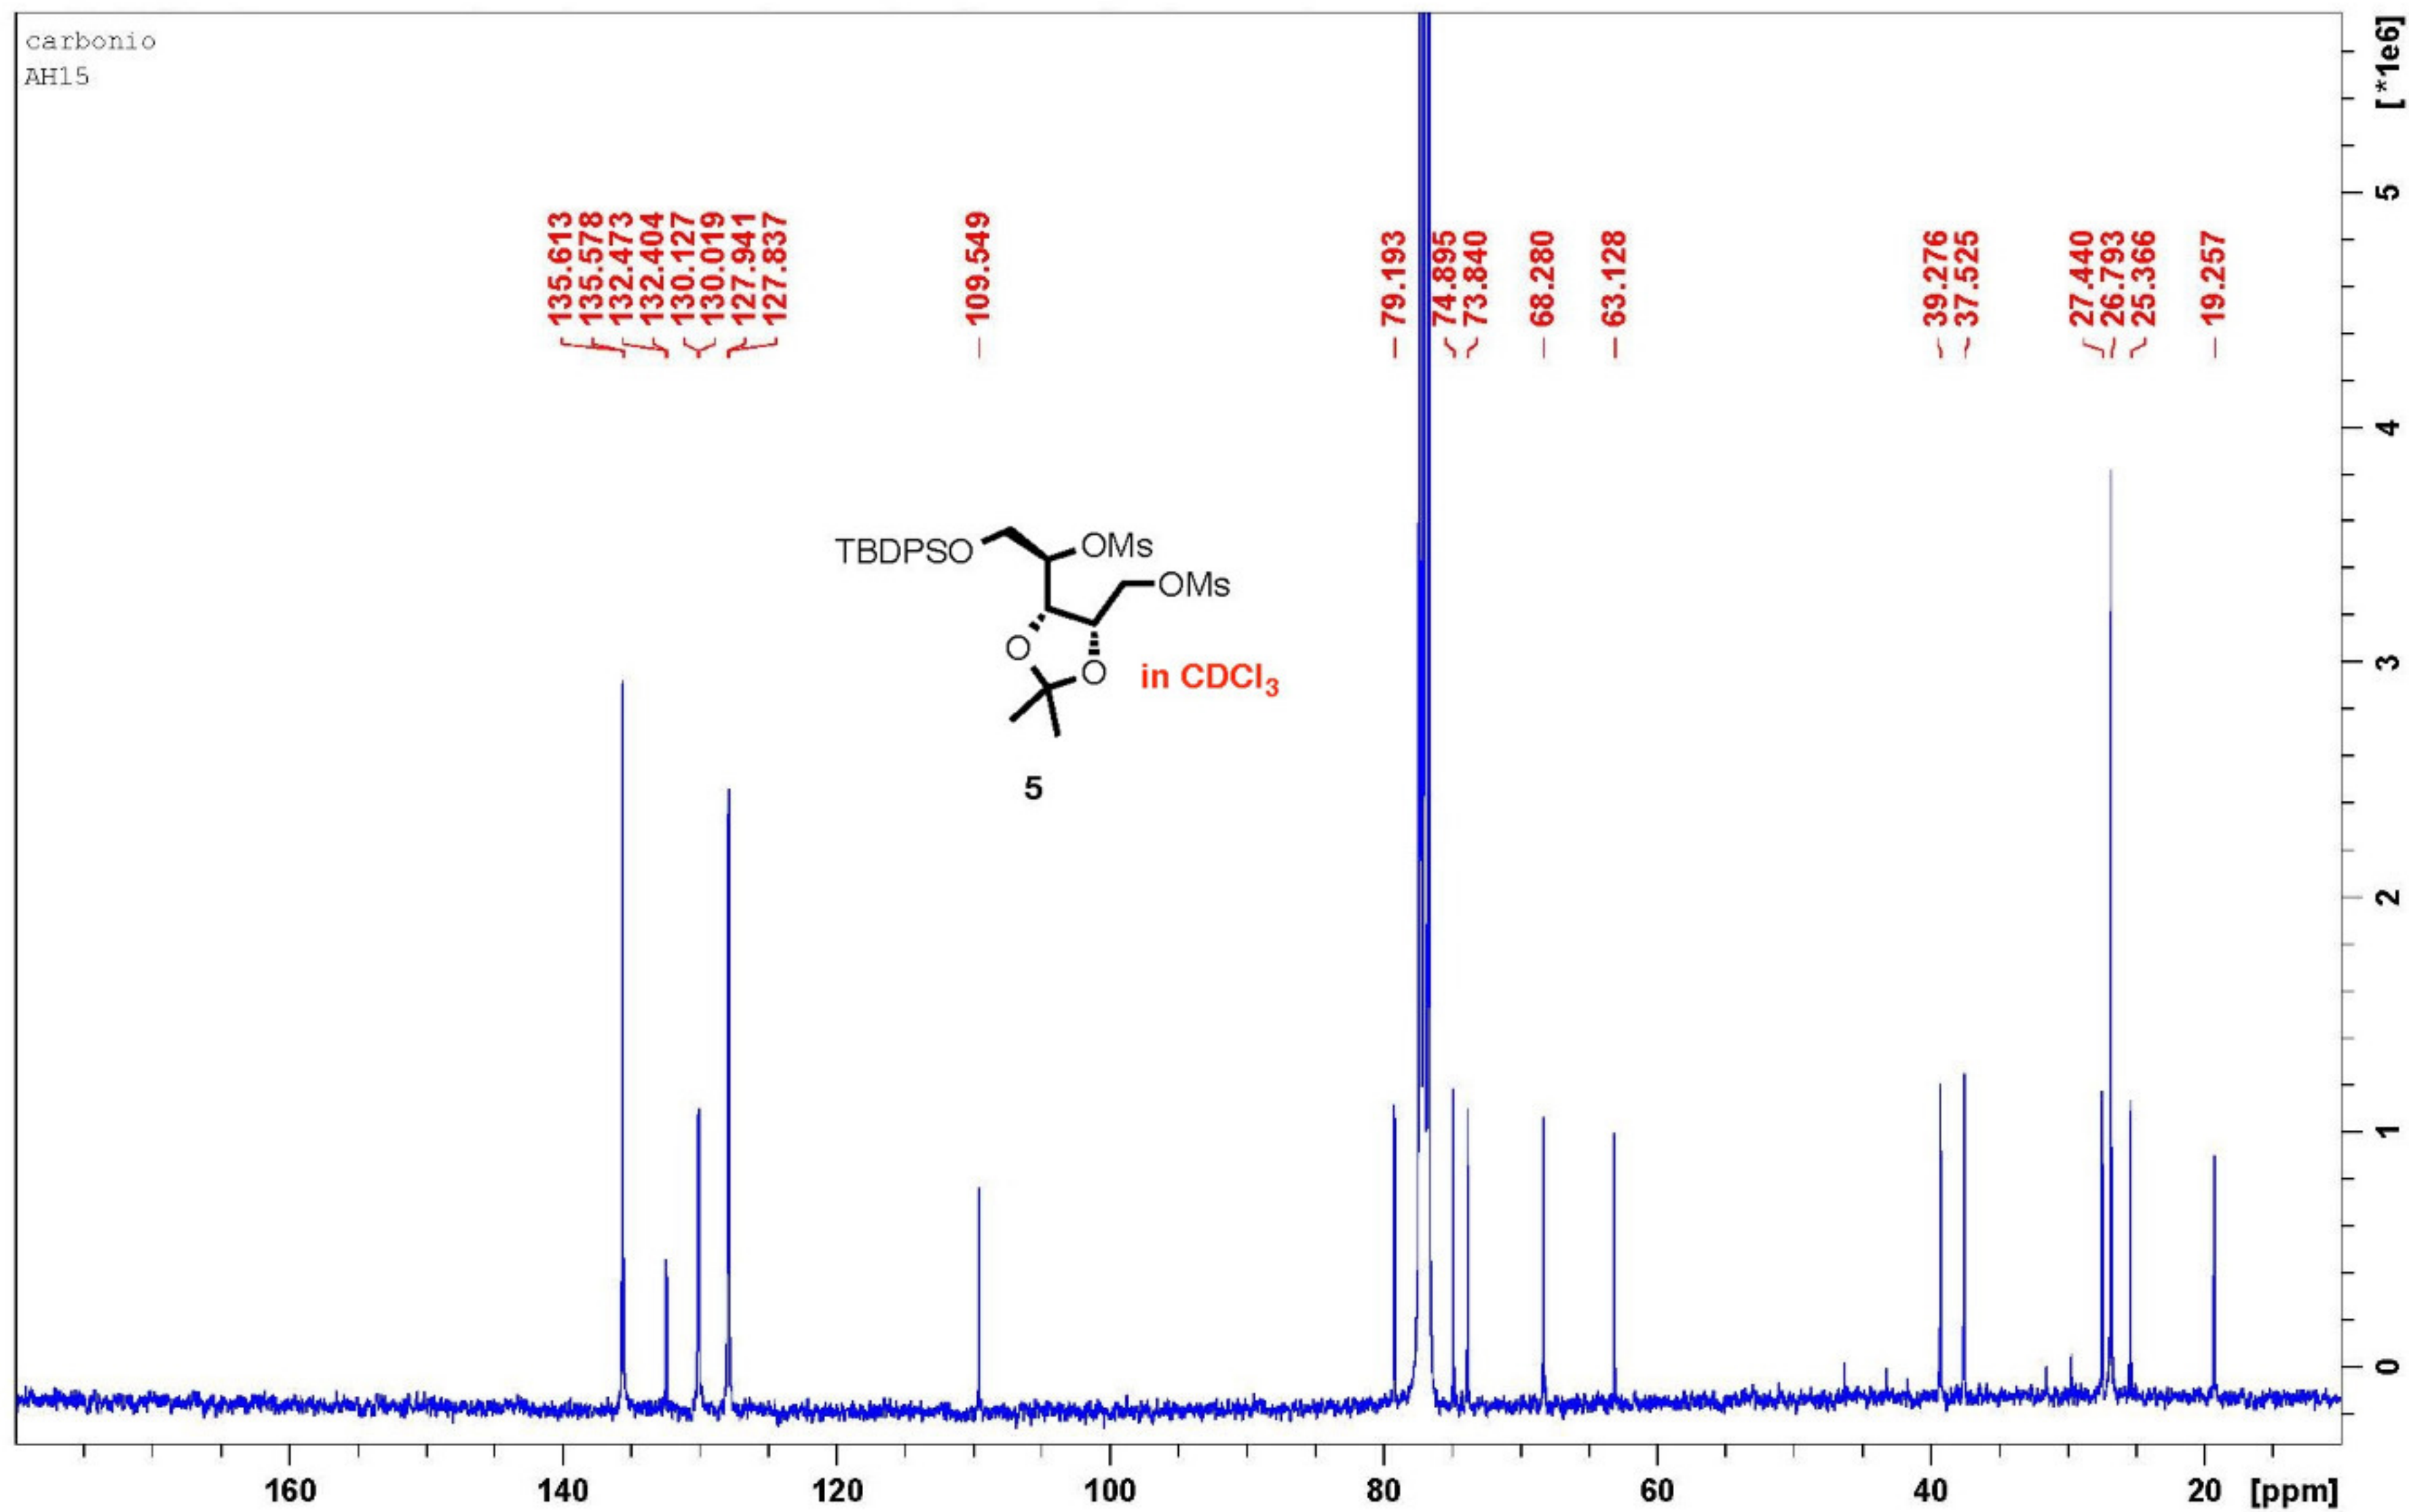

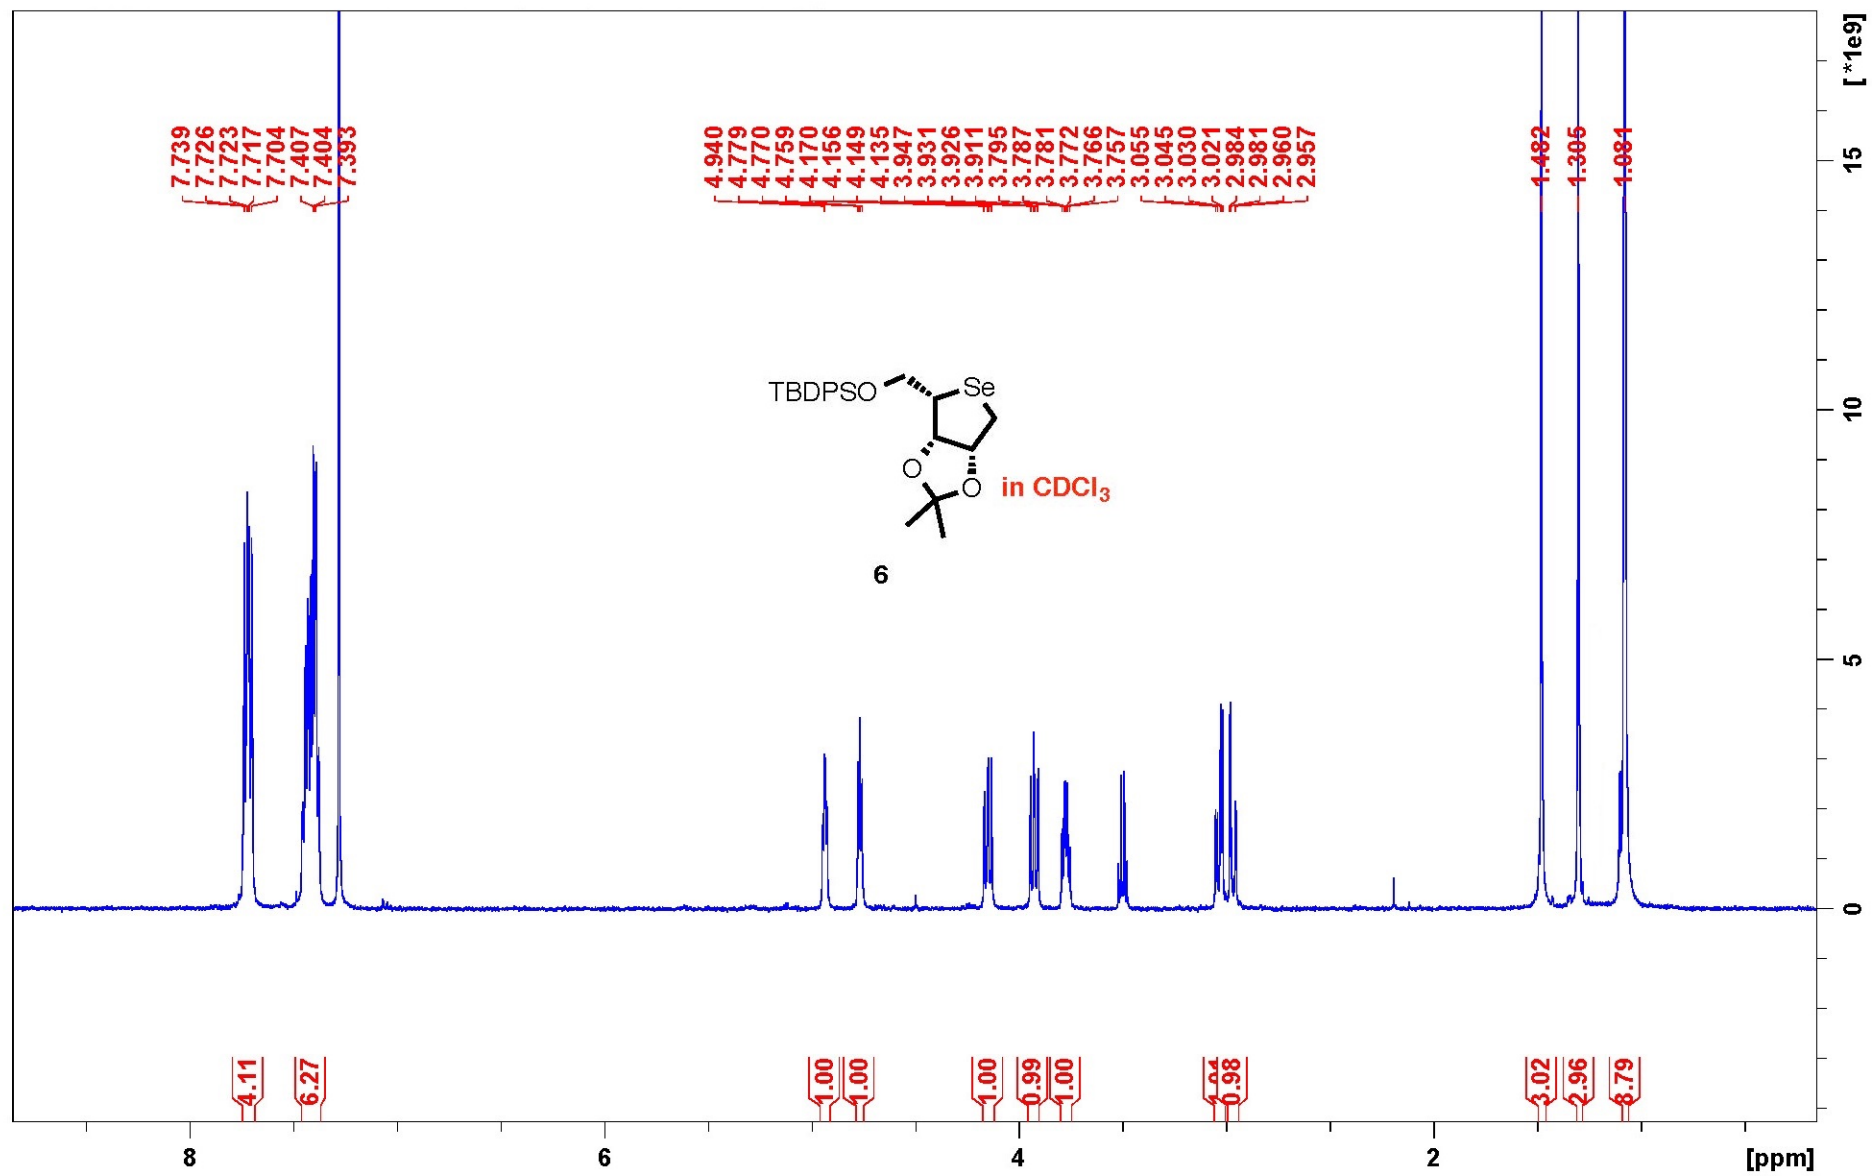



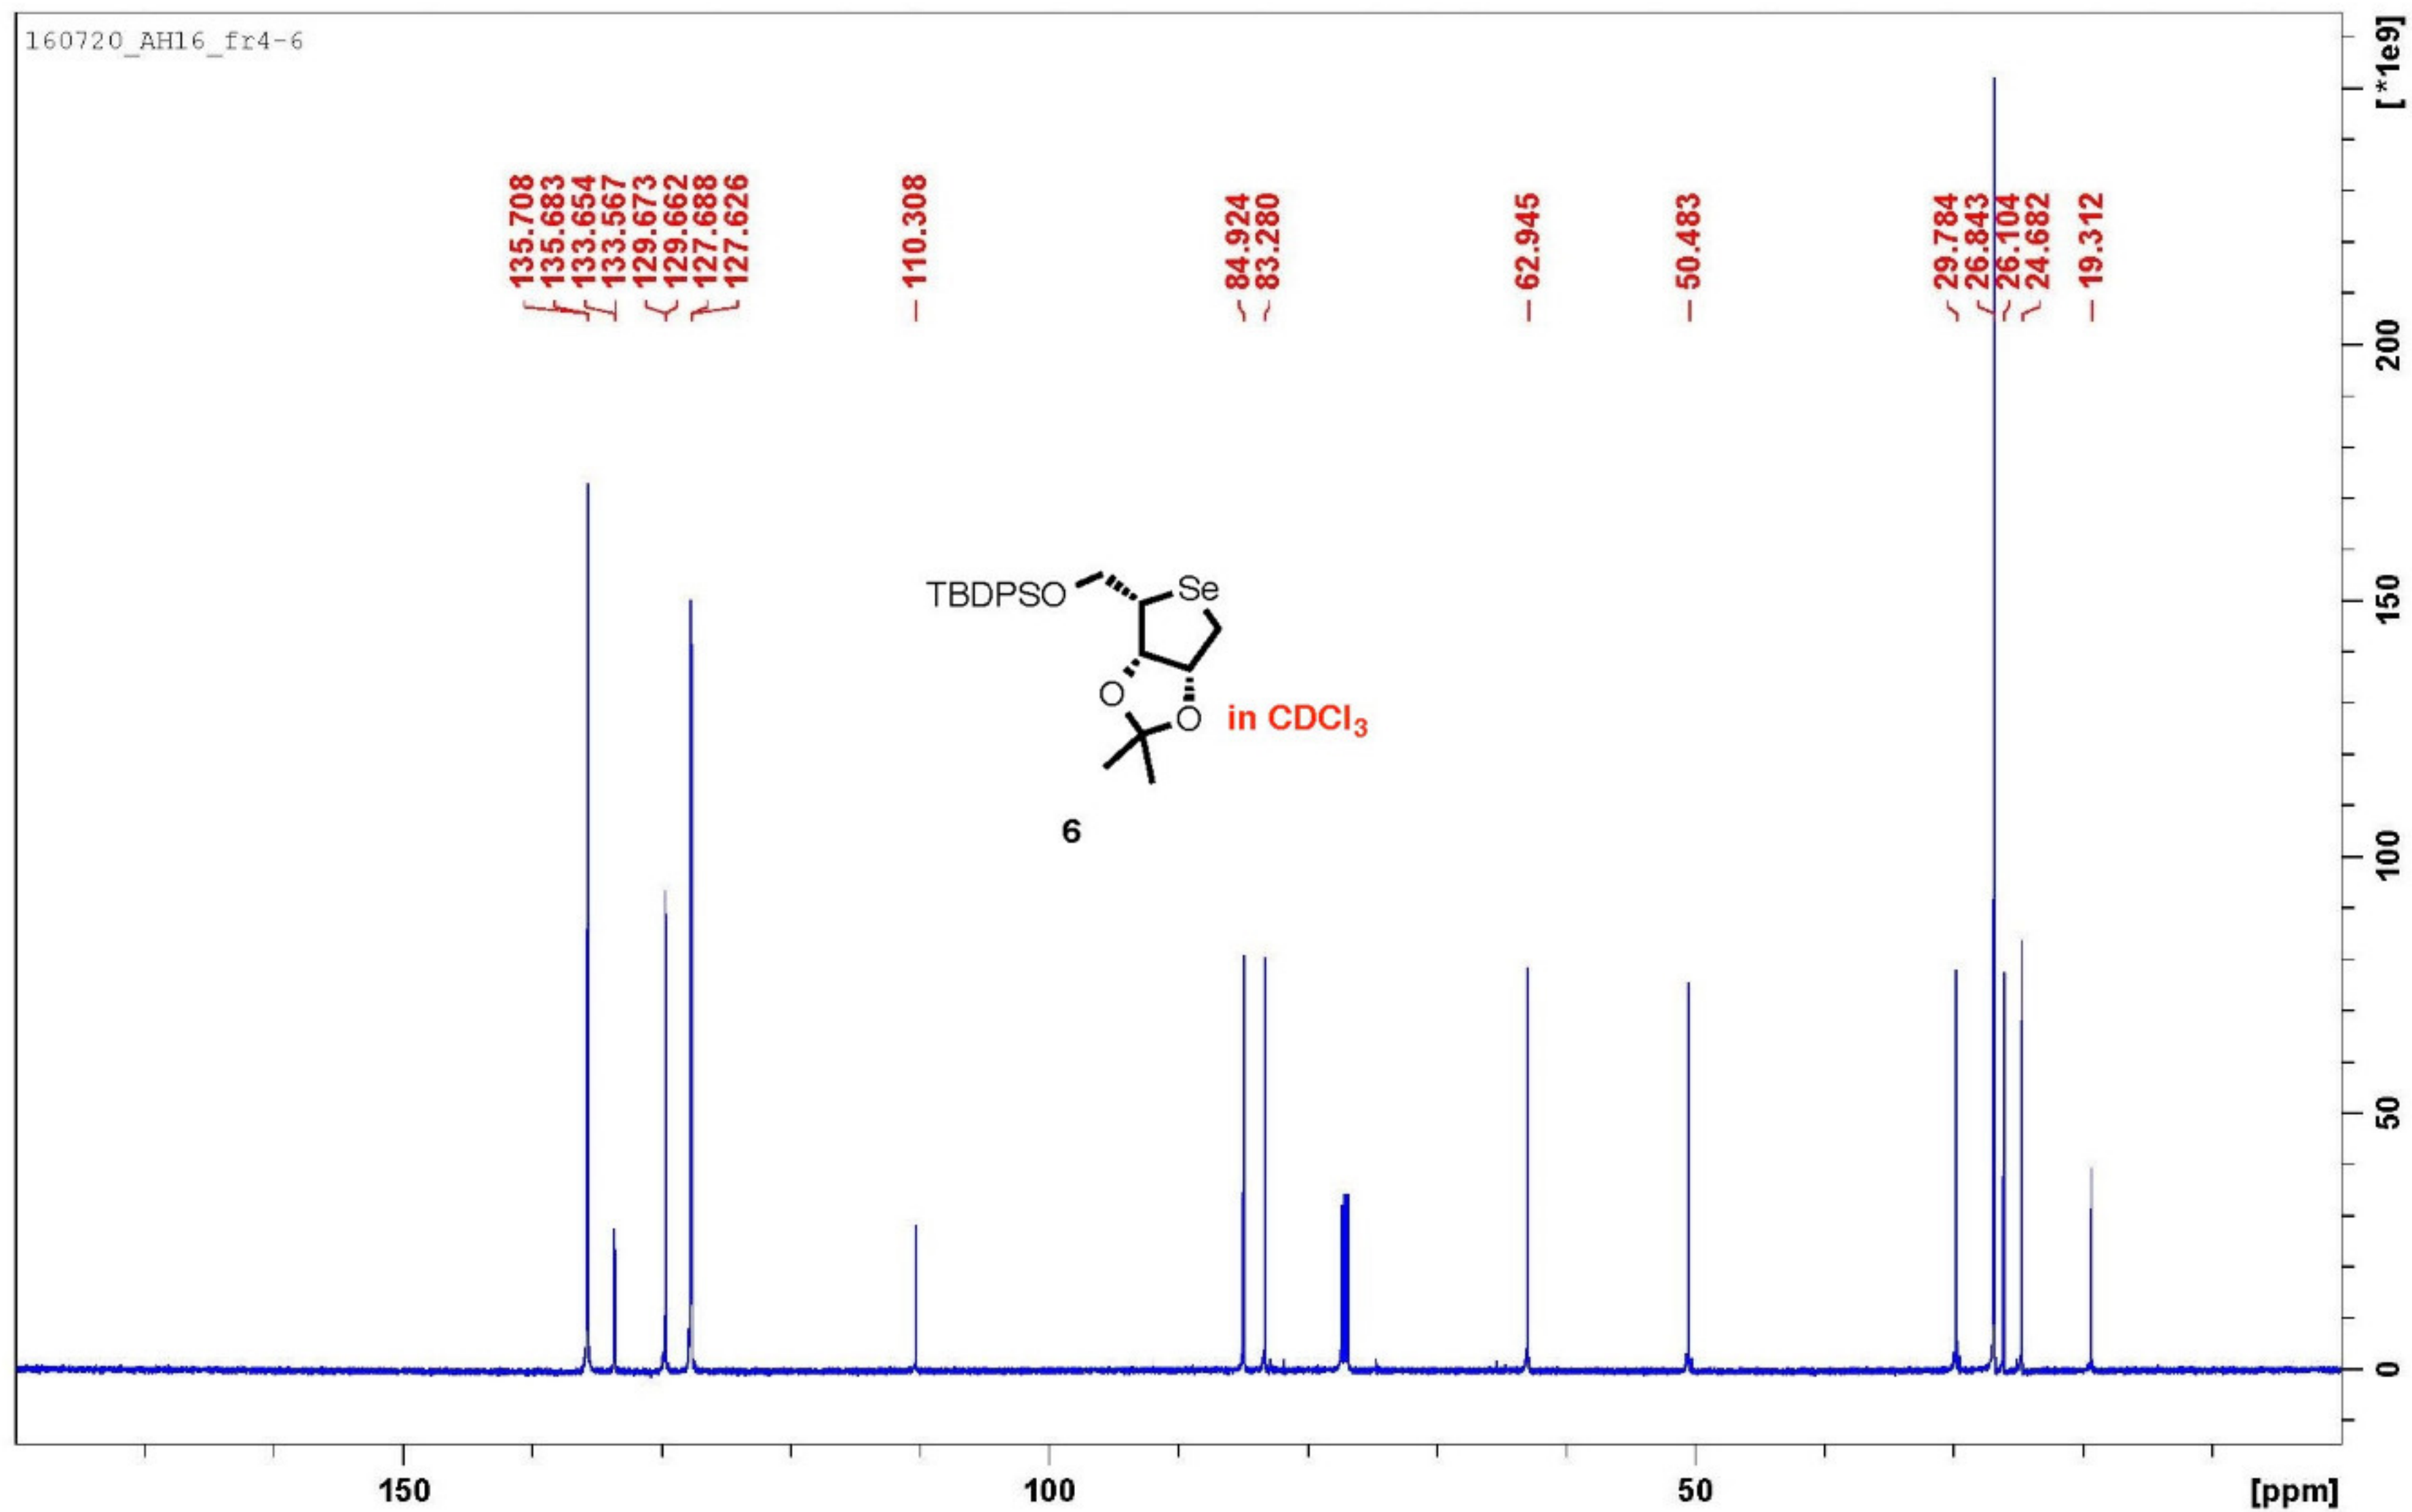





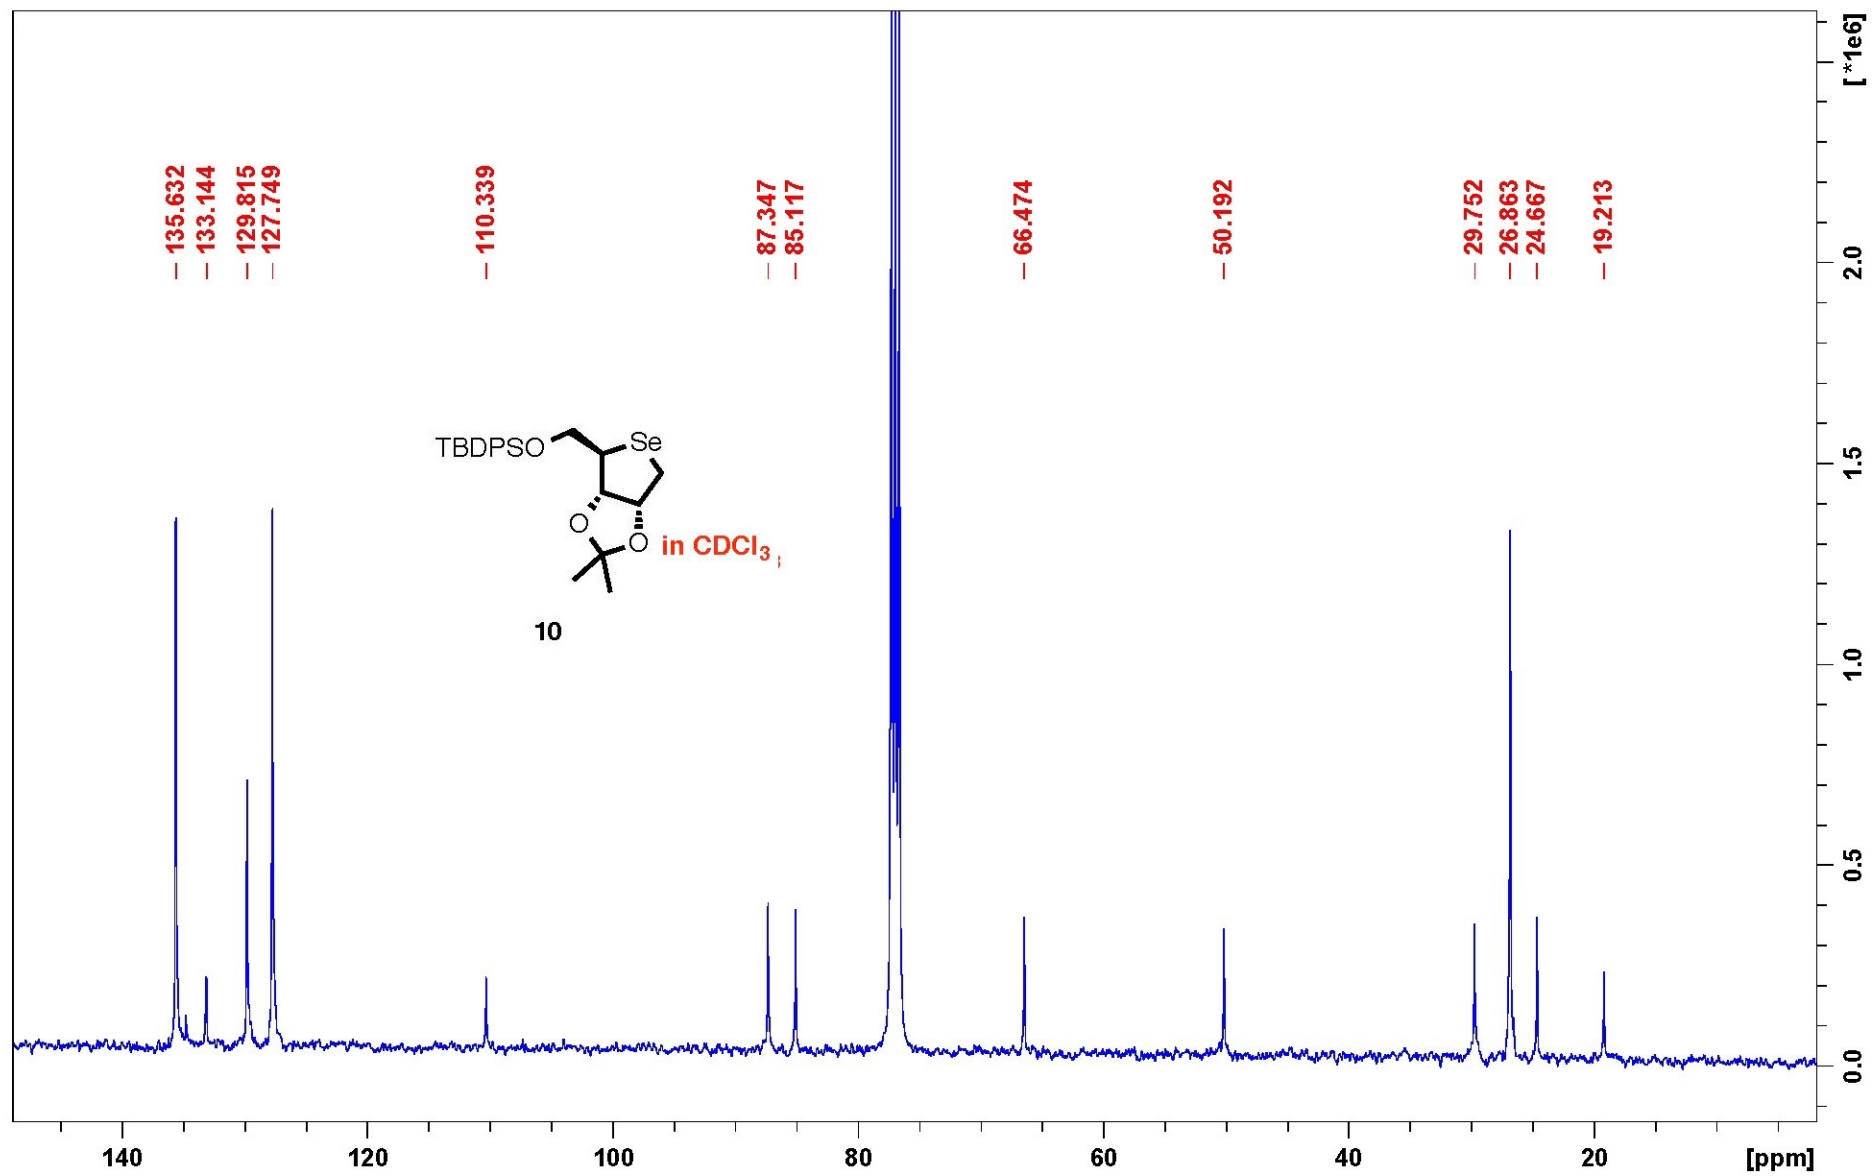

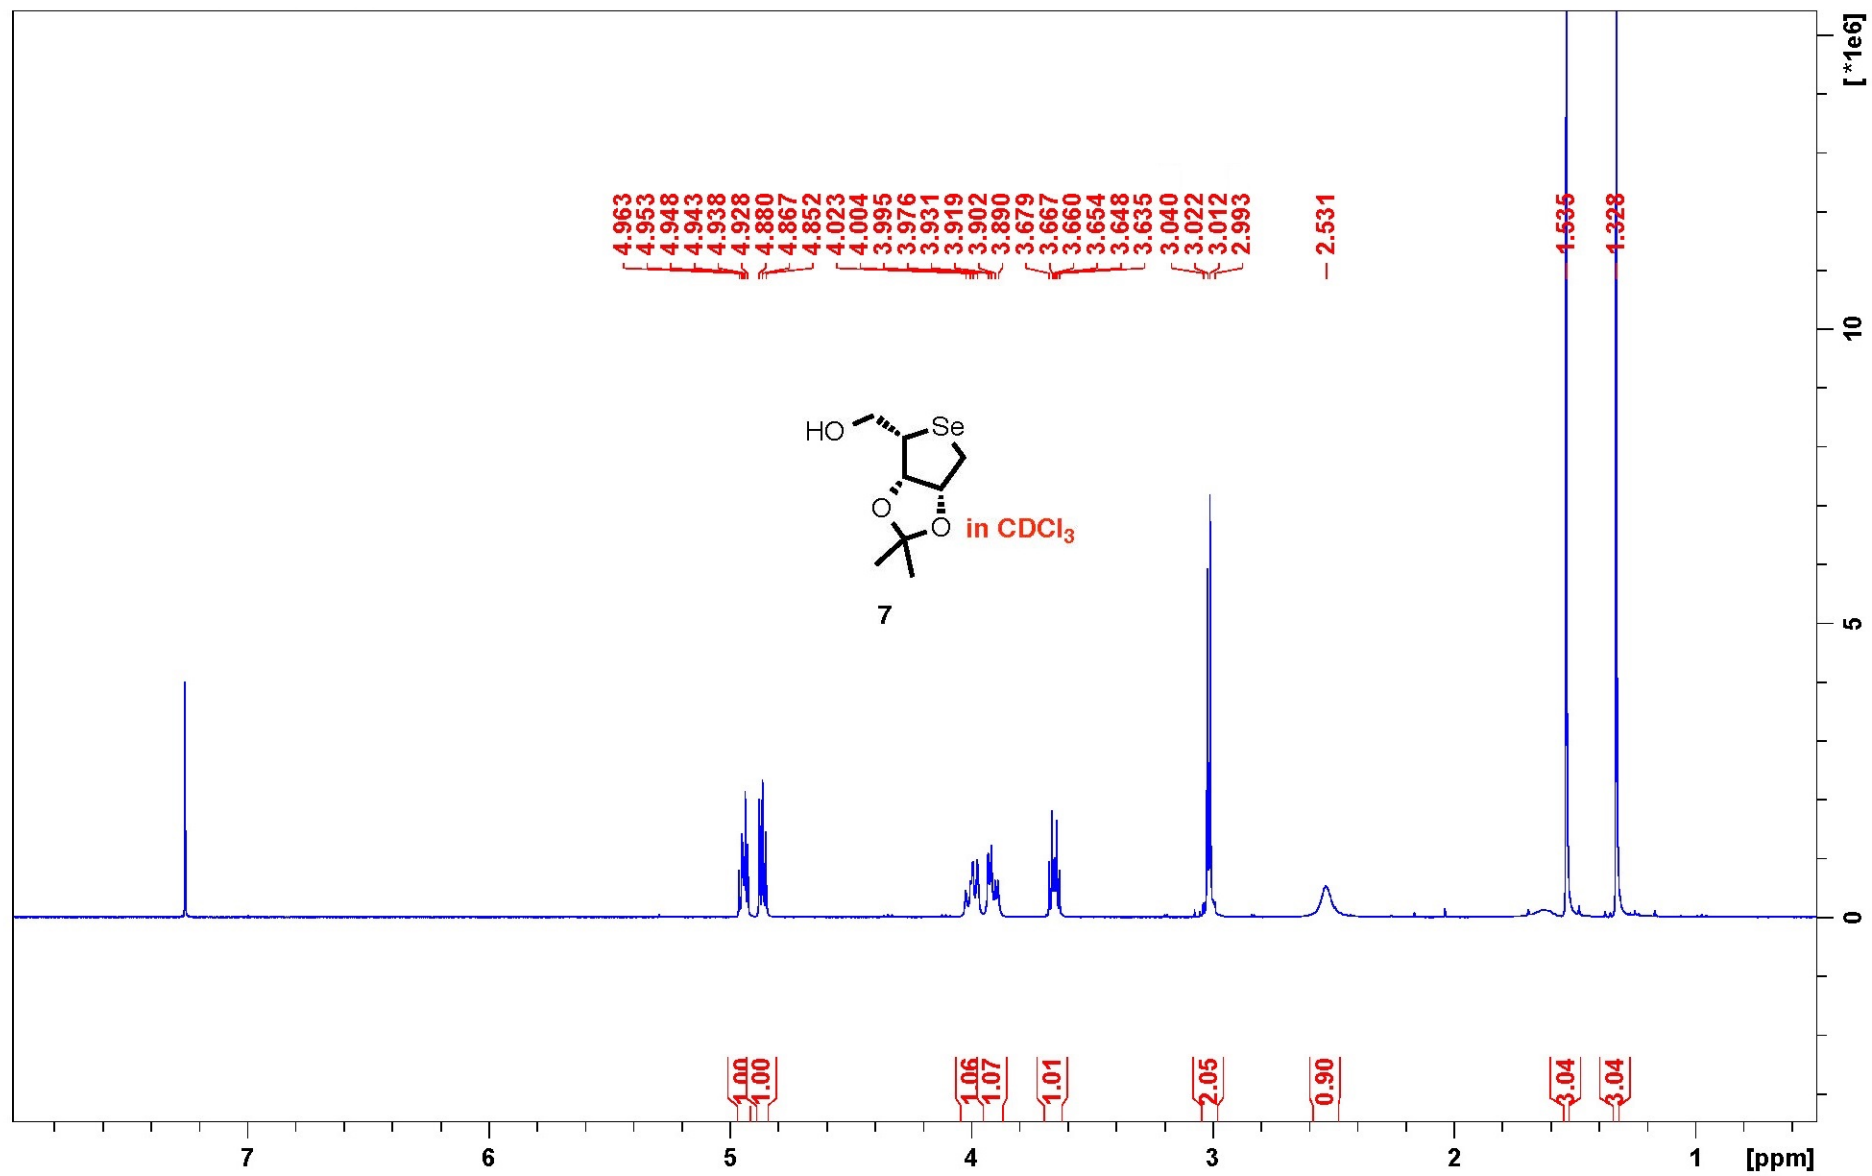

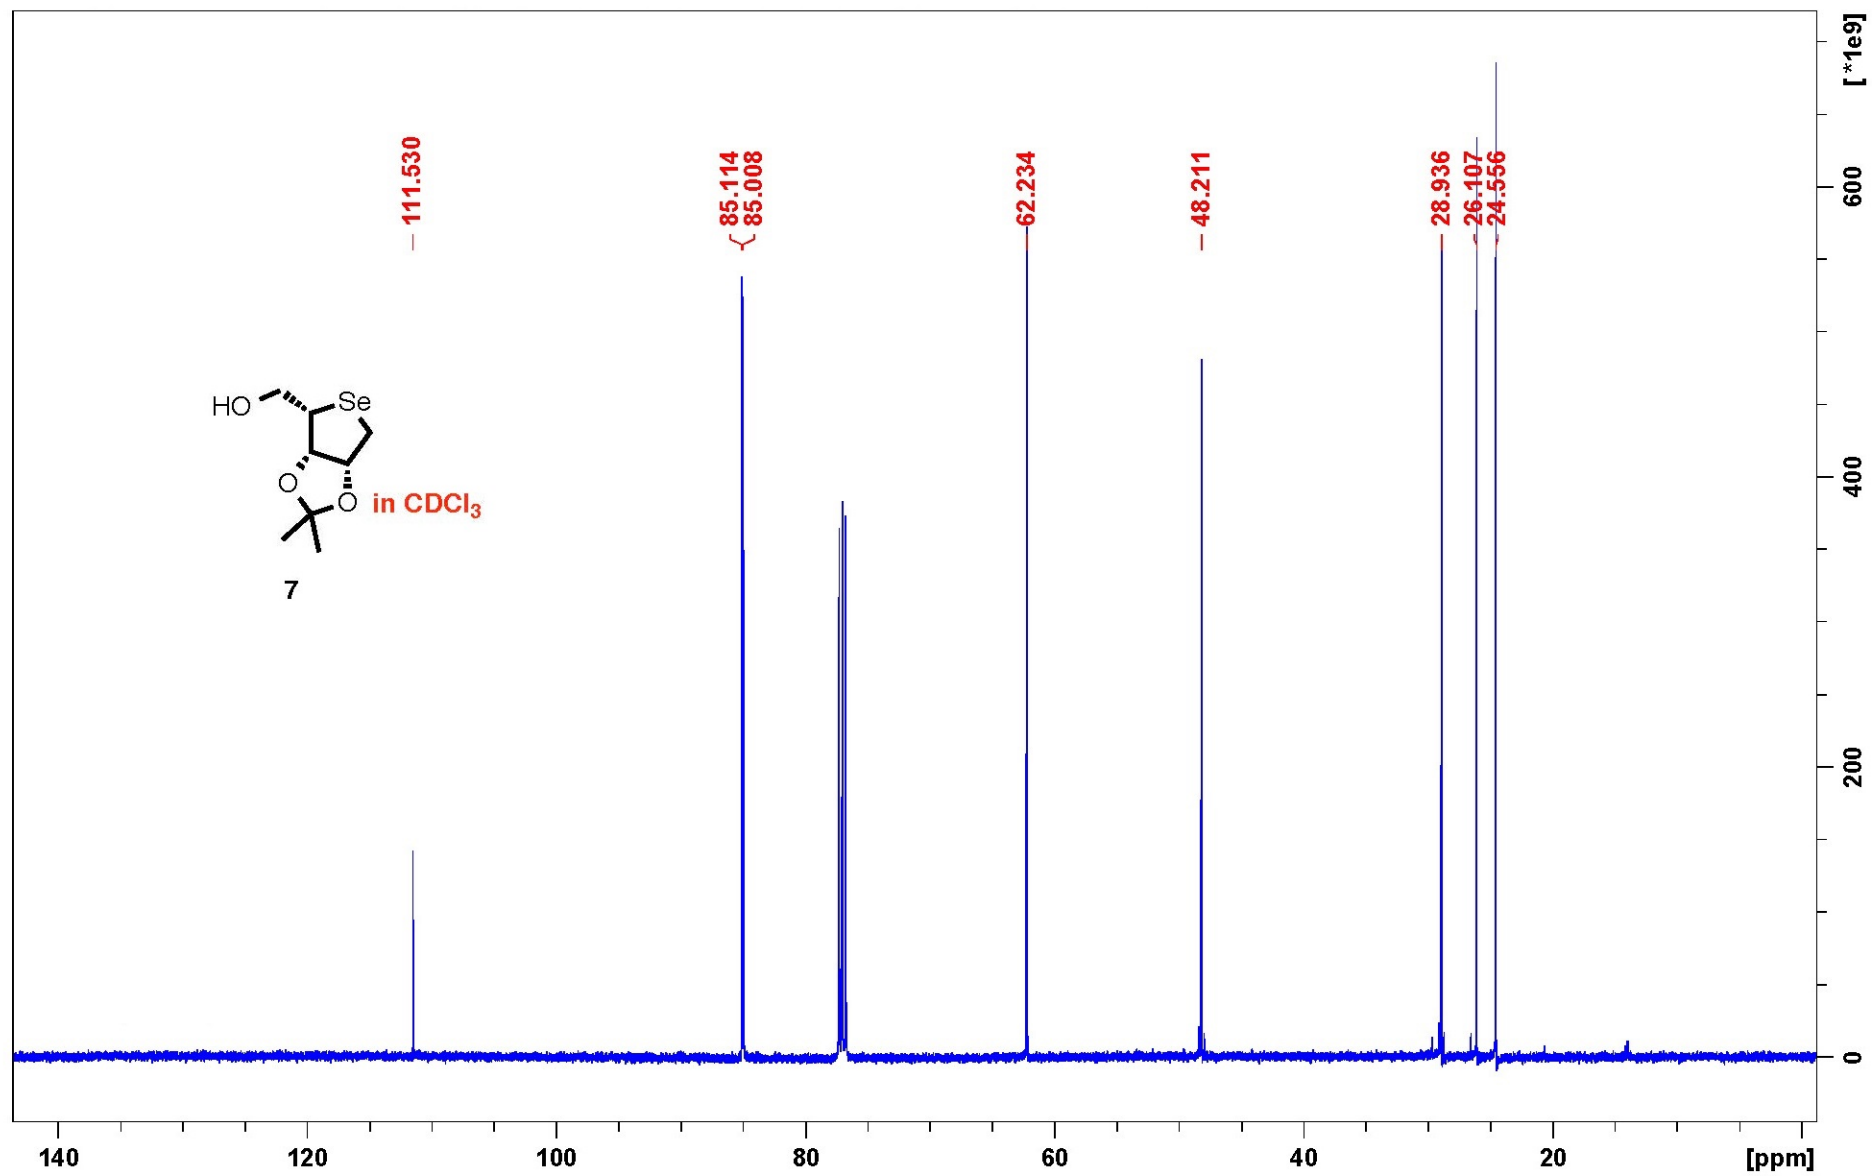

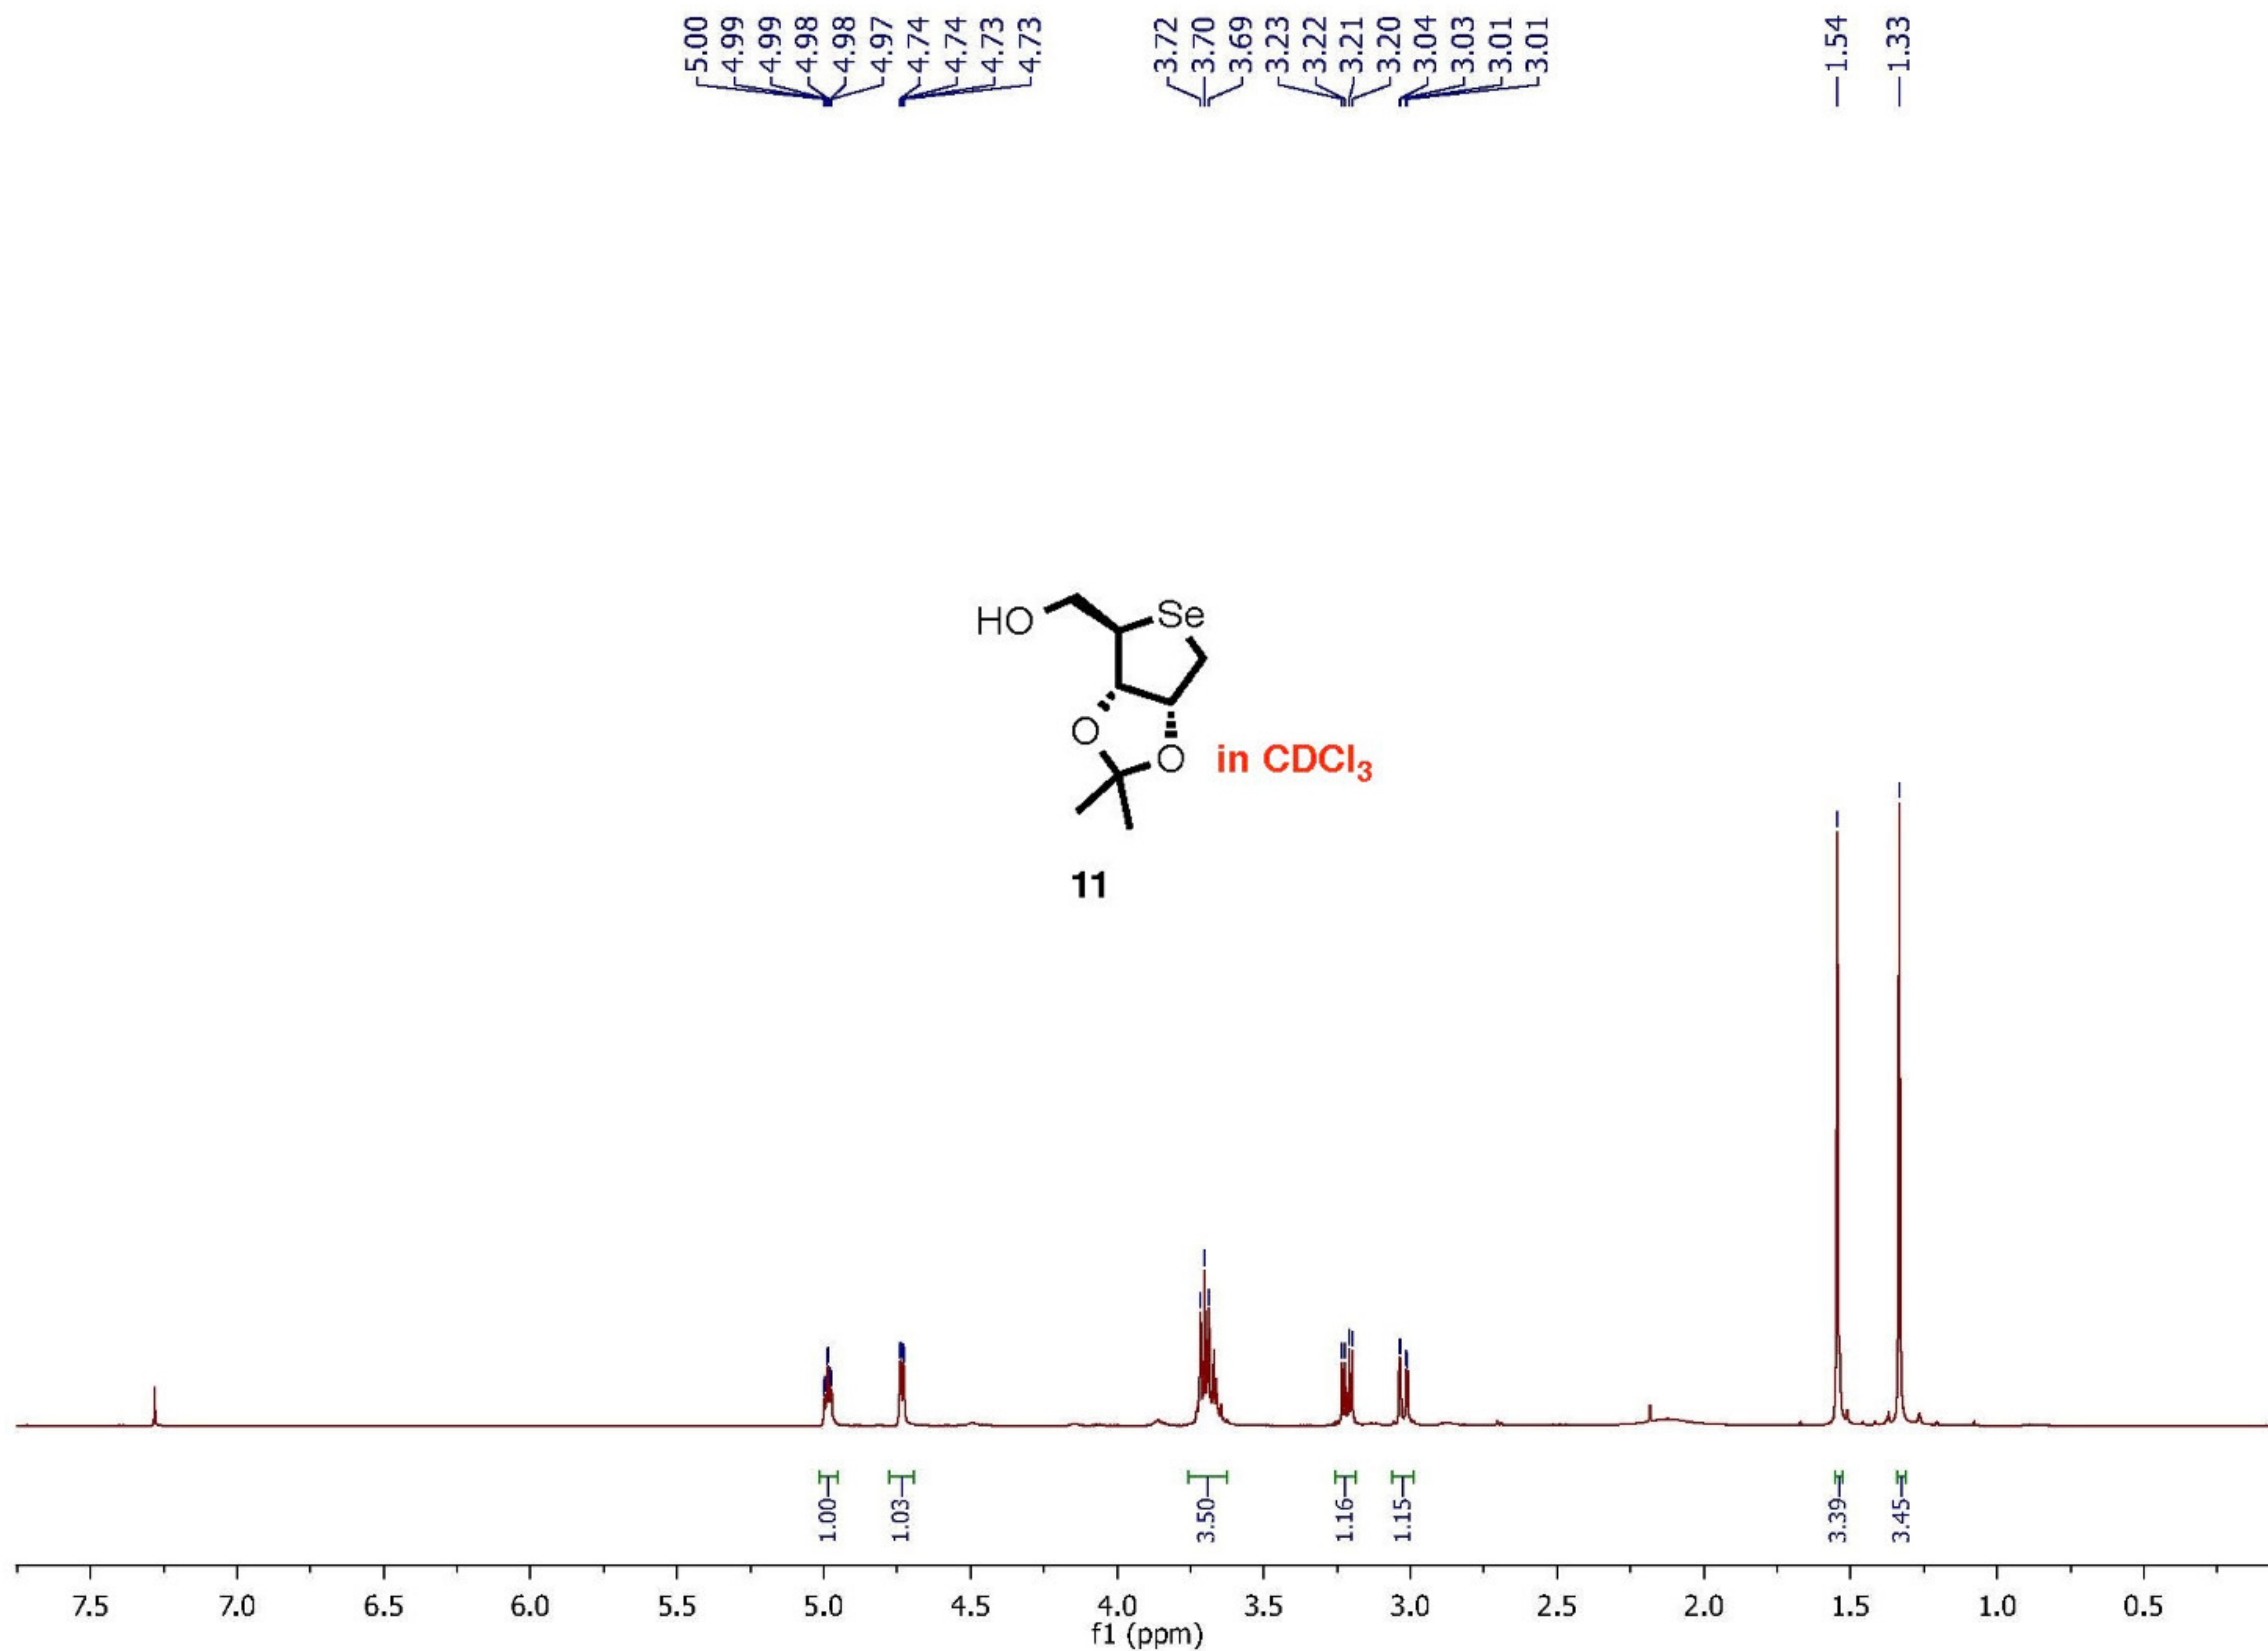

Sample Name  
Date collected

Pulse sequence **CARBON**  
Solvent **cdcl3**

Temperature **25**  
Spectrometer **inova500-inova500**

Study owner **cts**  
Operator **cts**

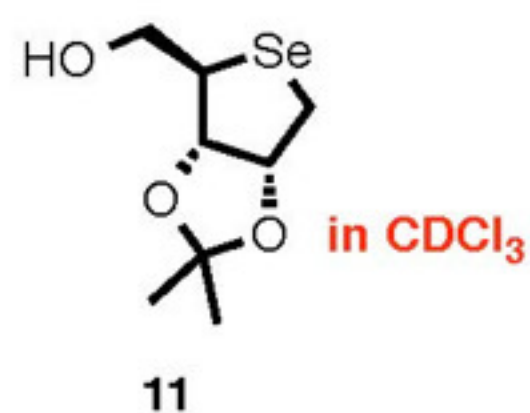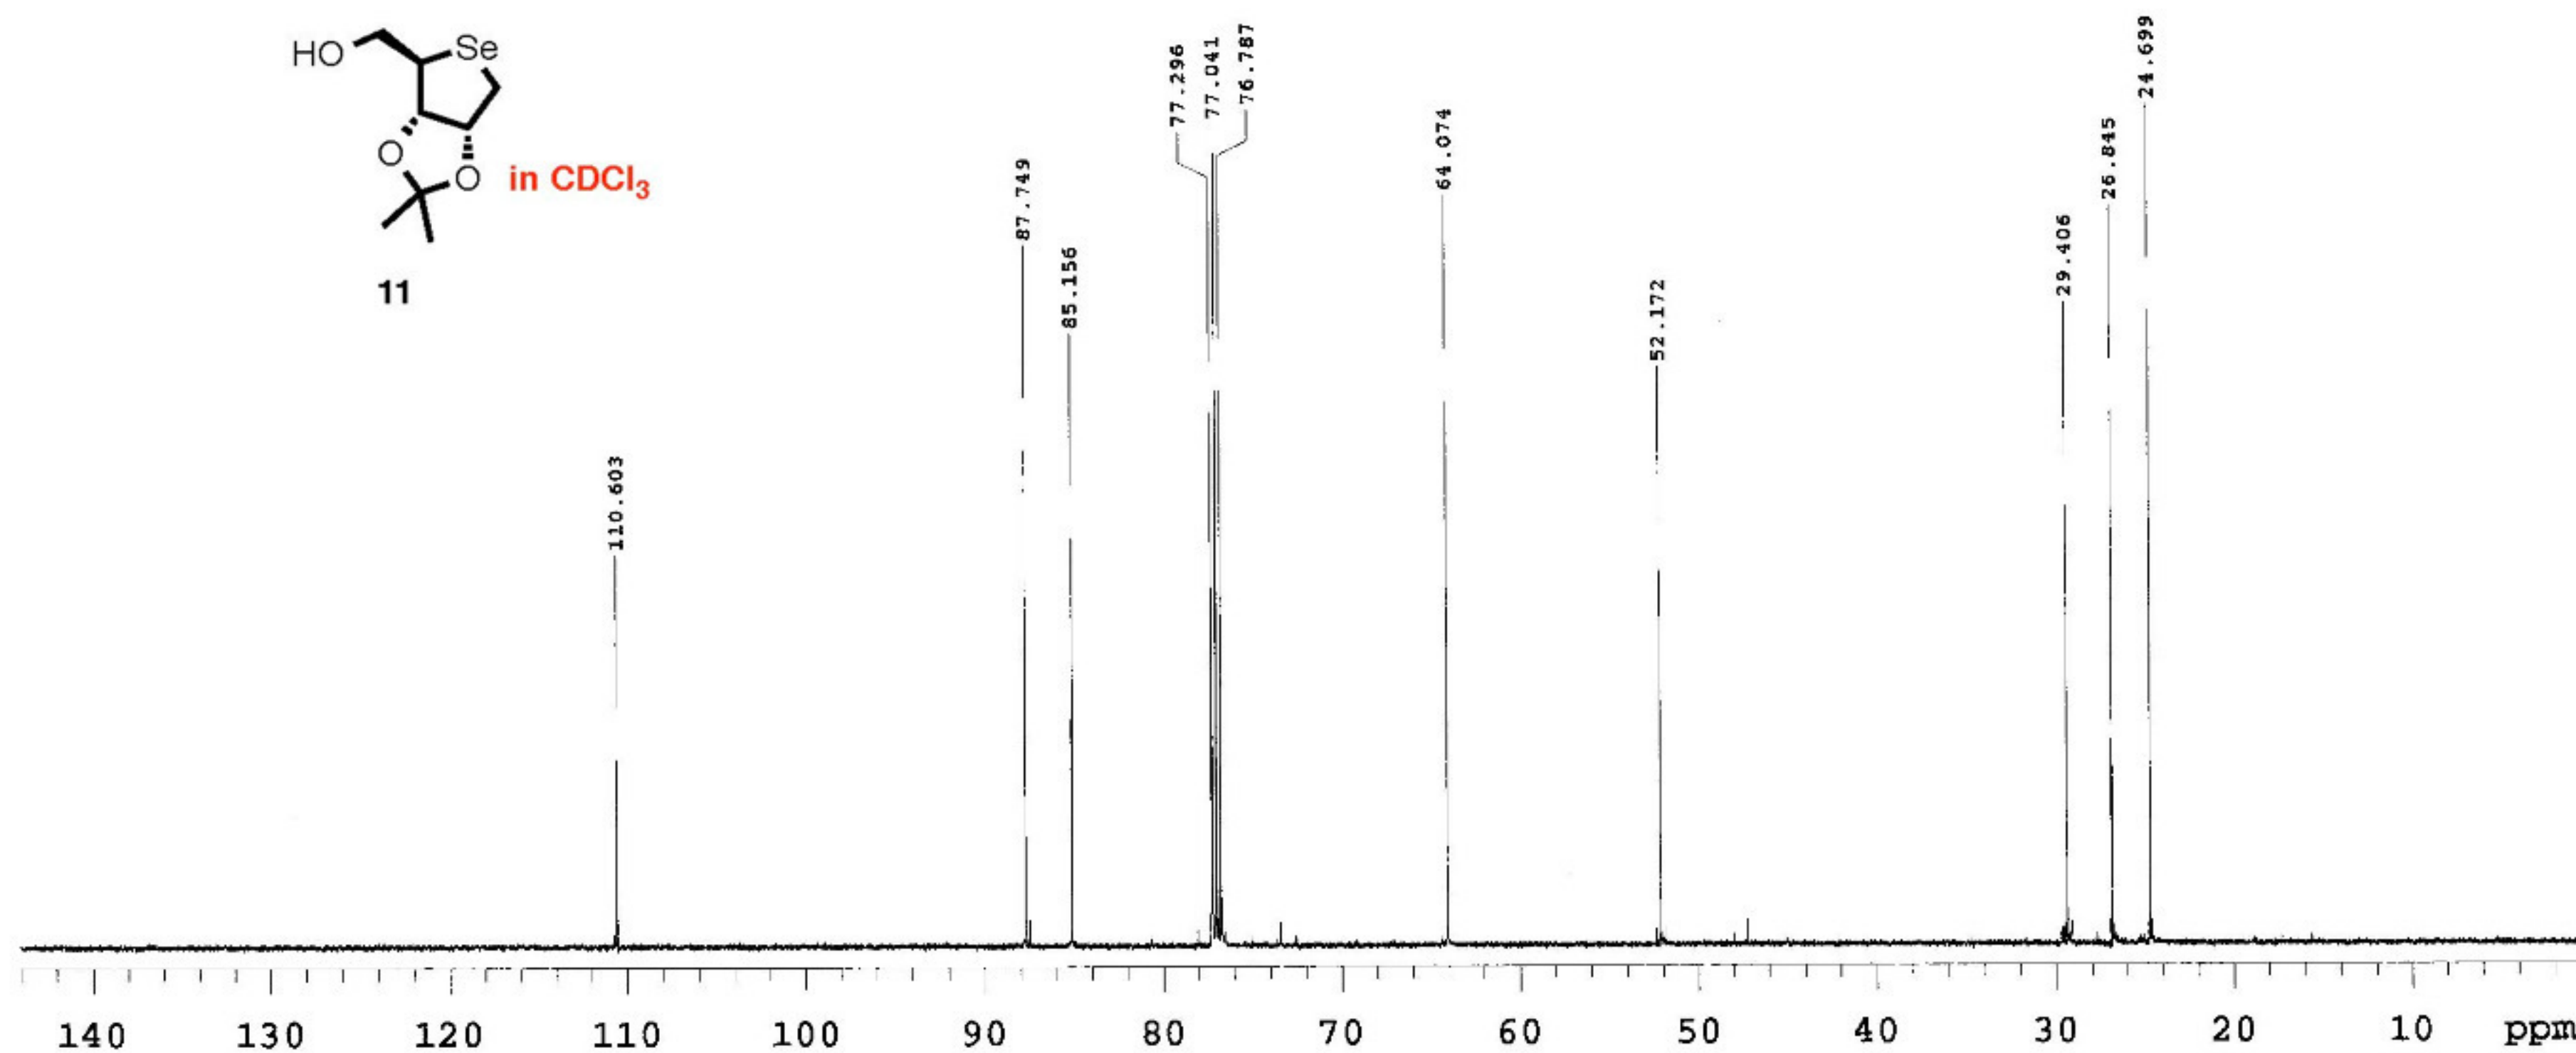



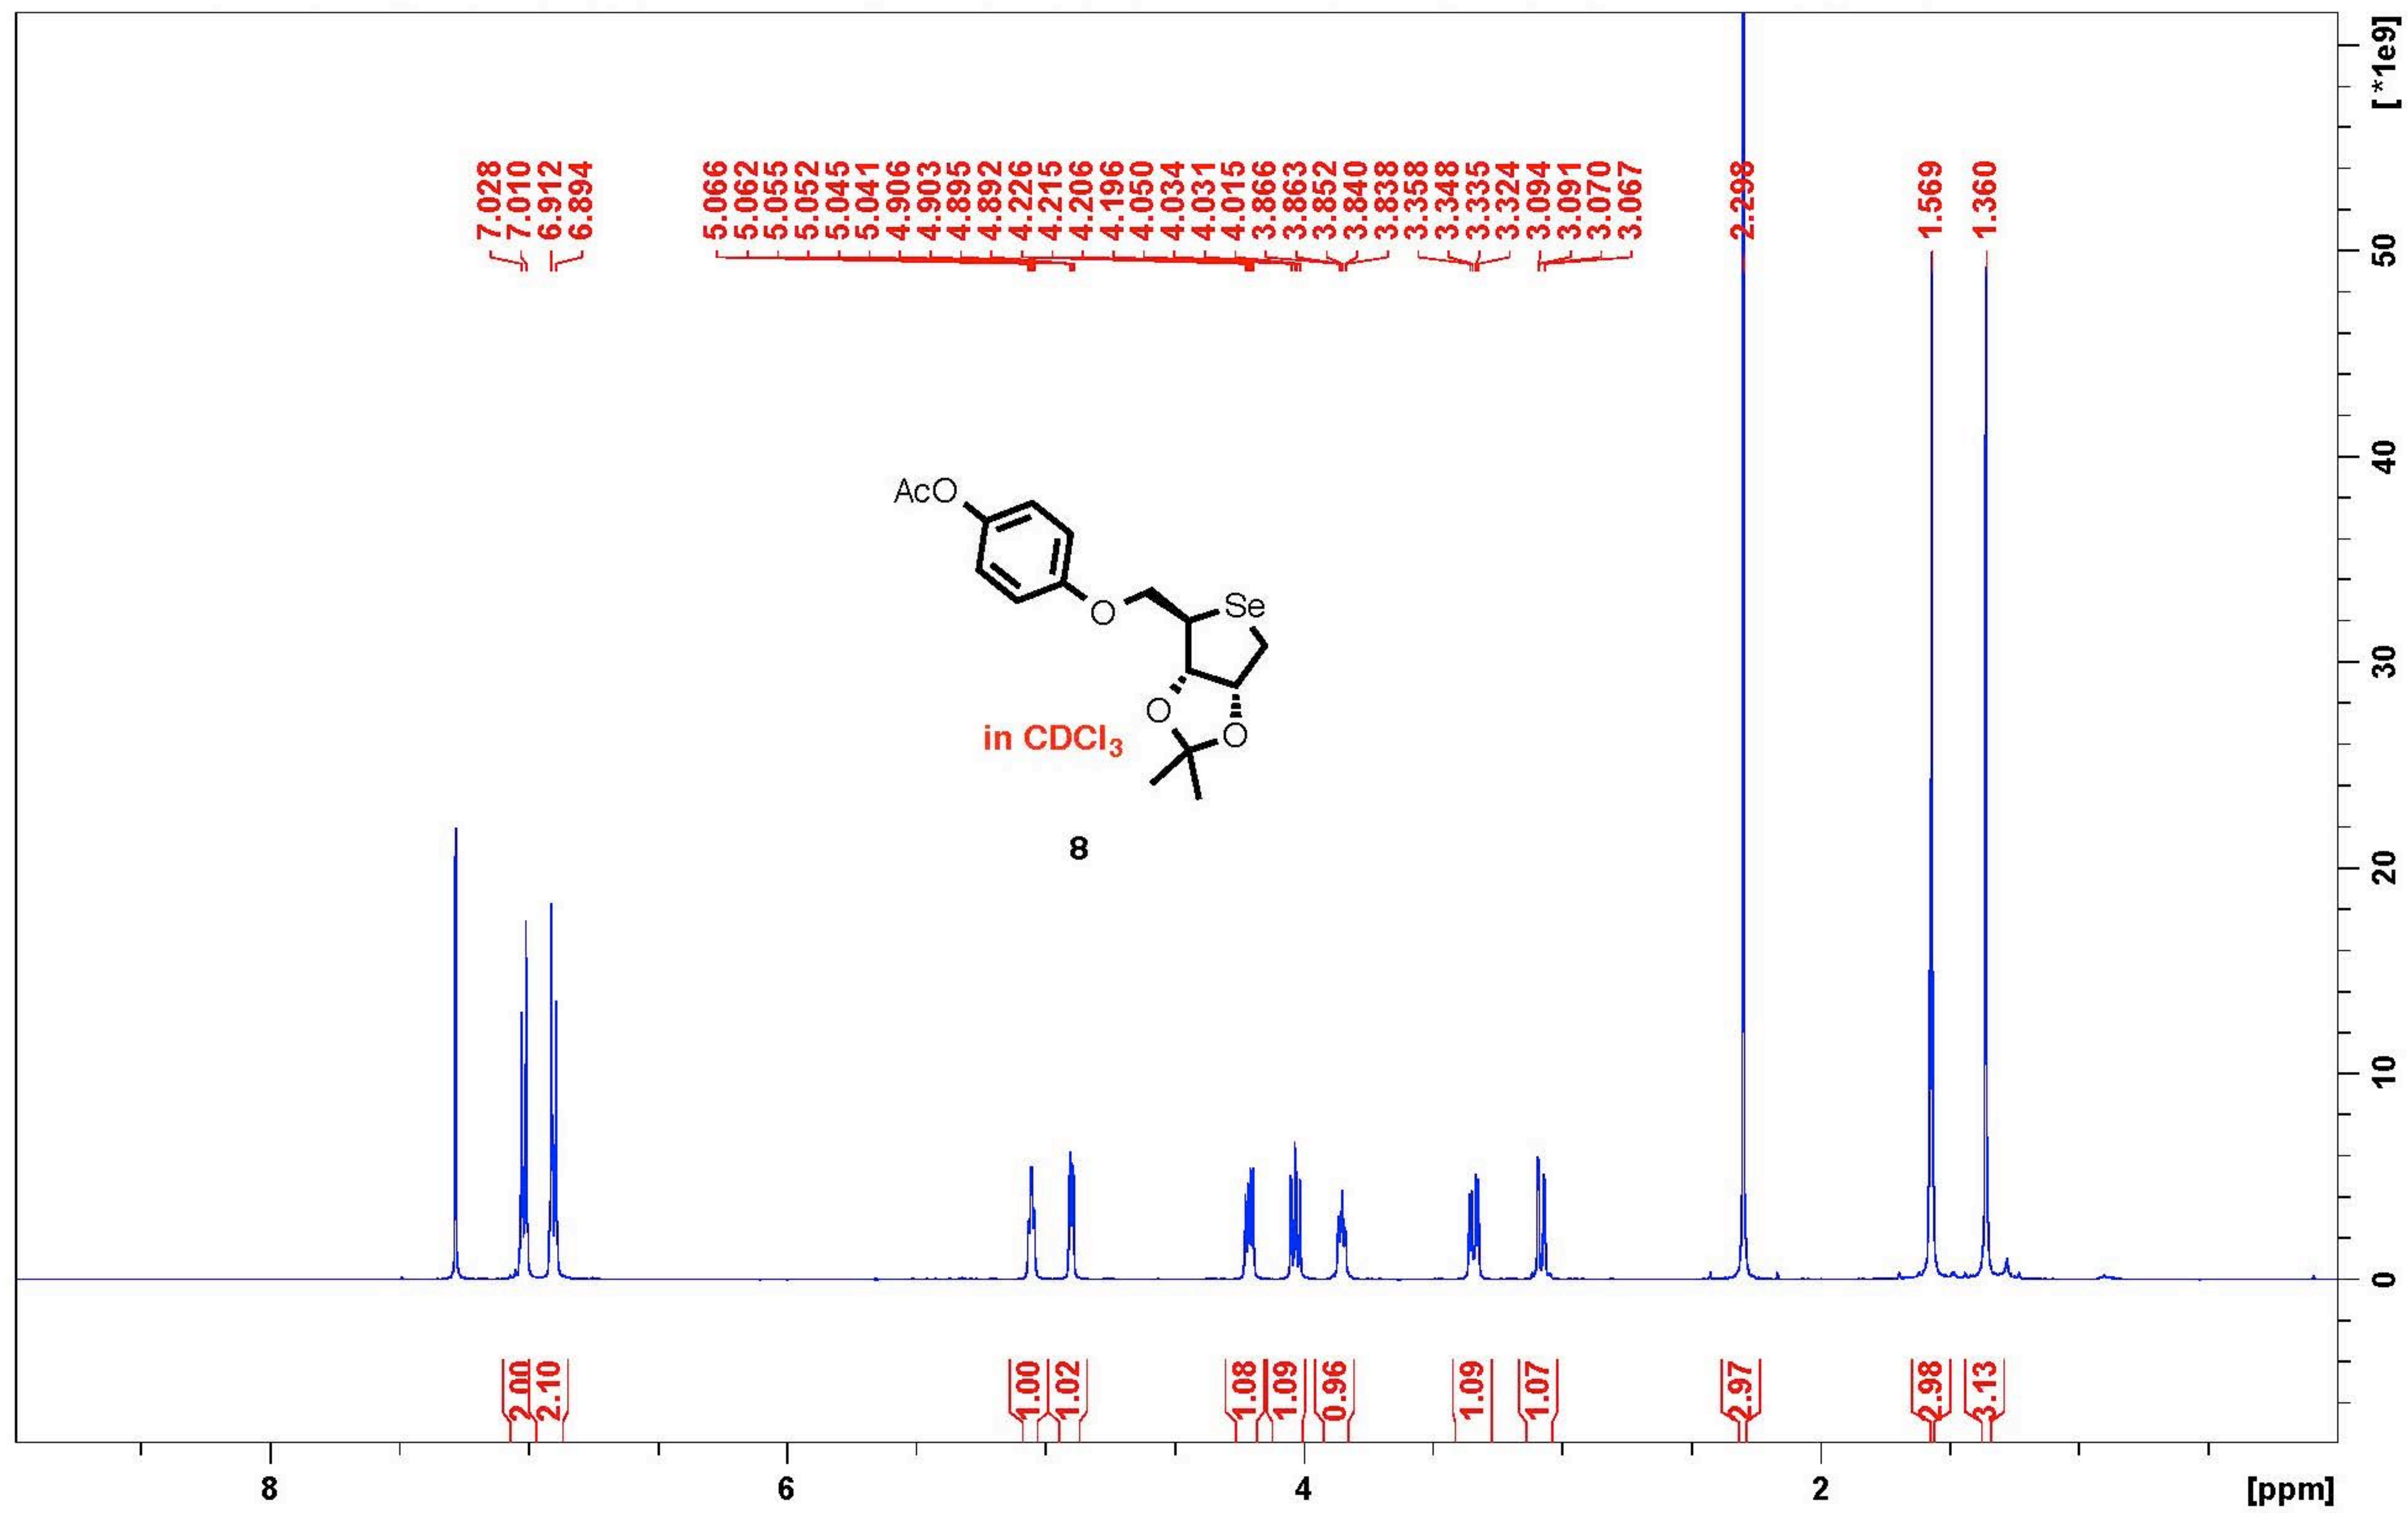



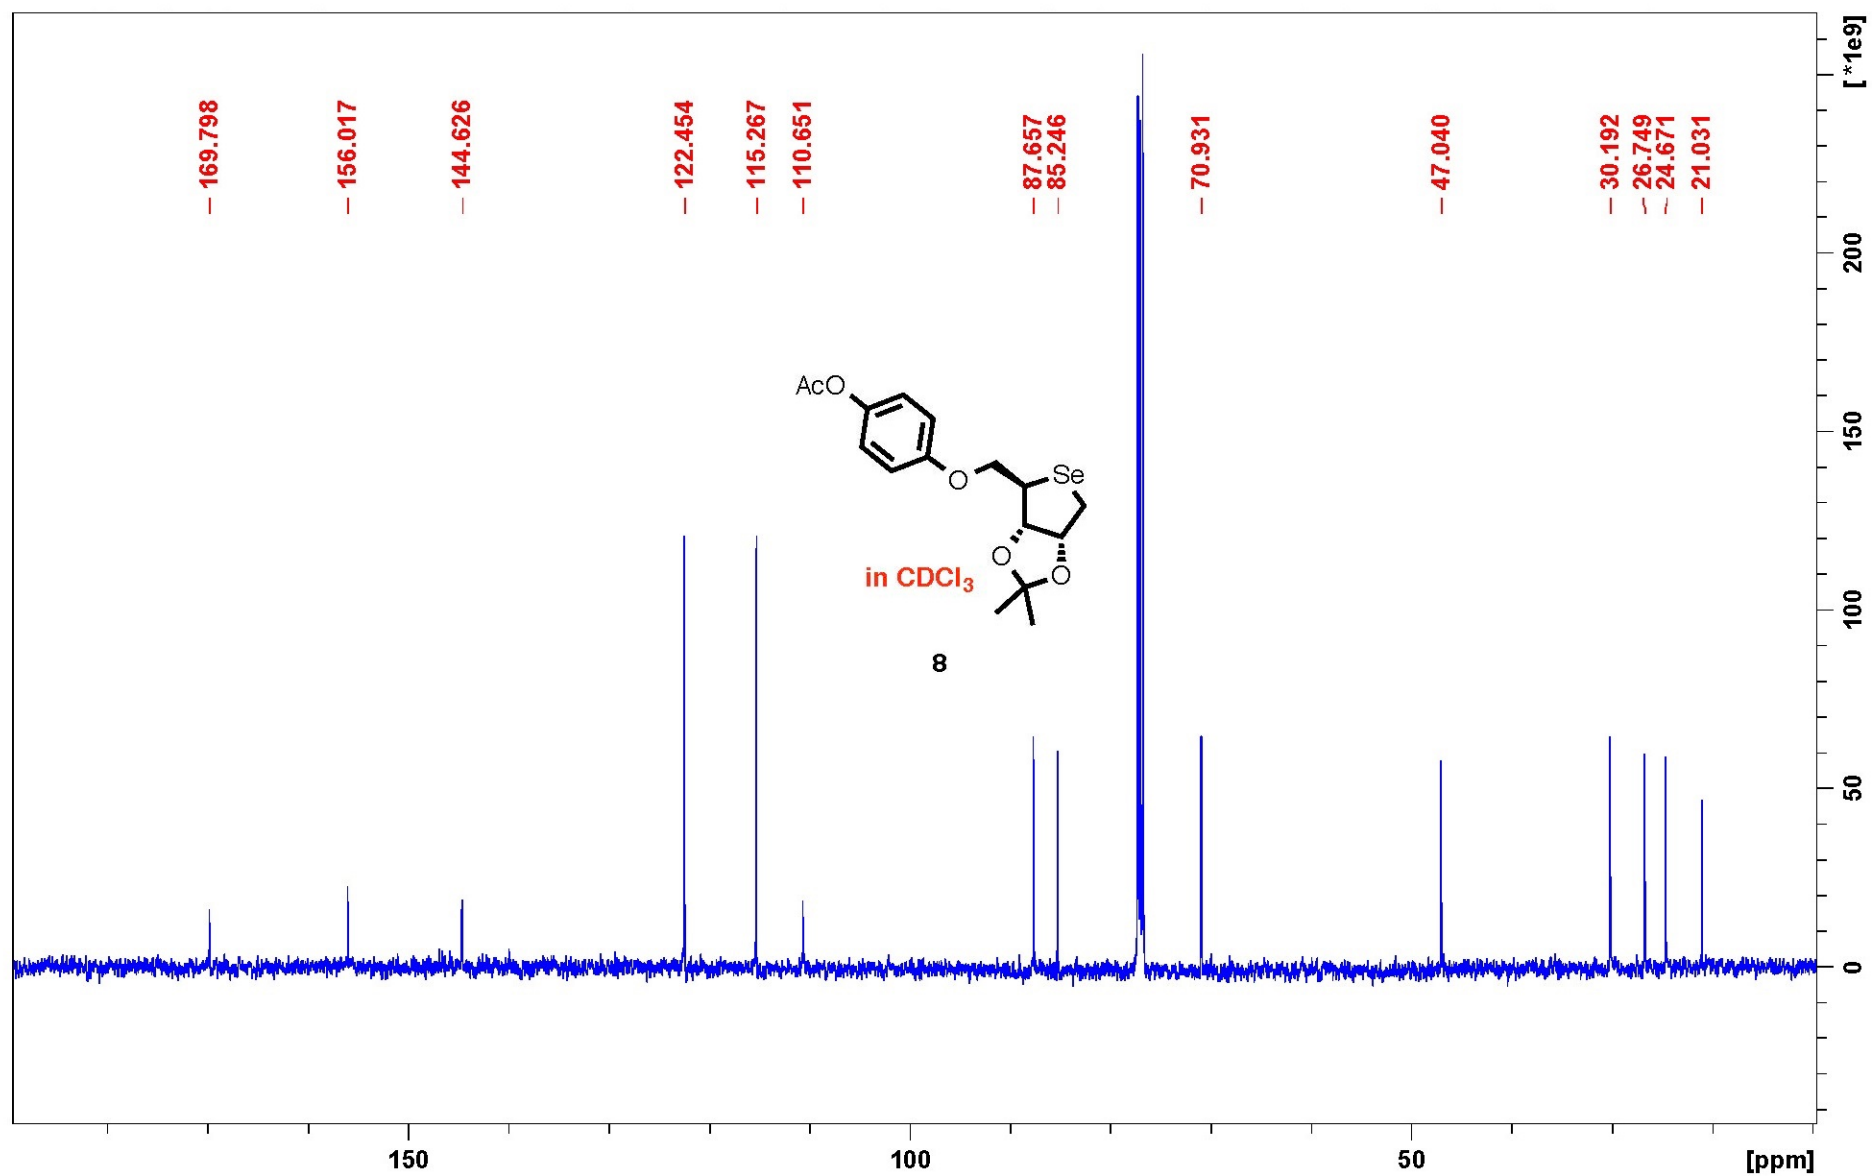

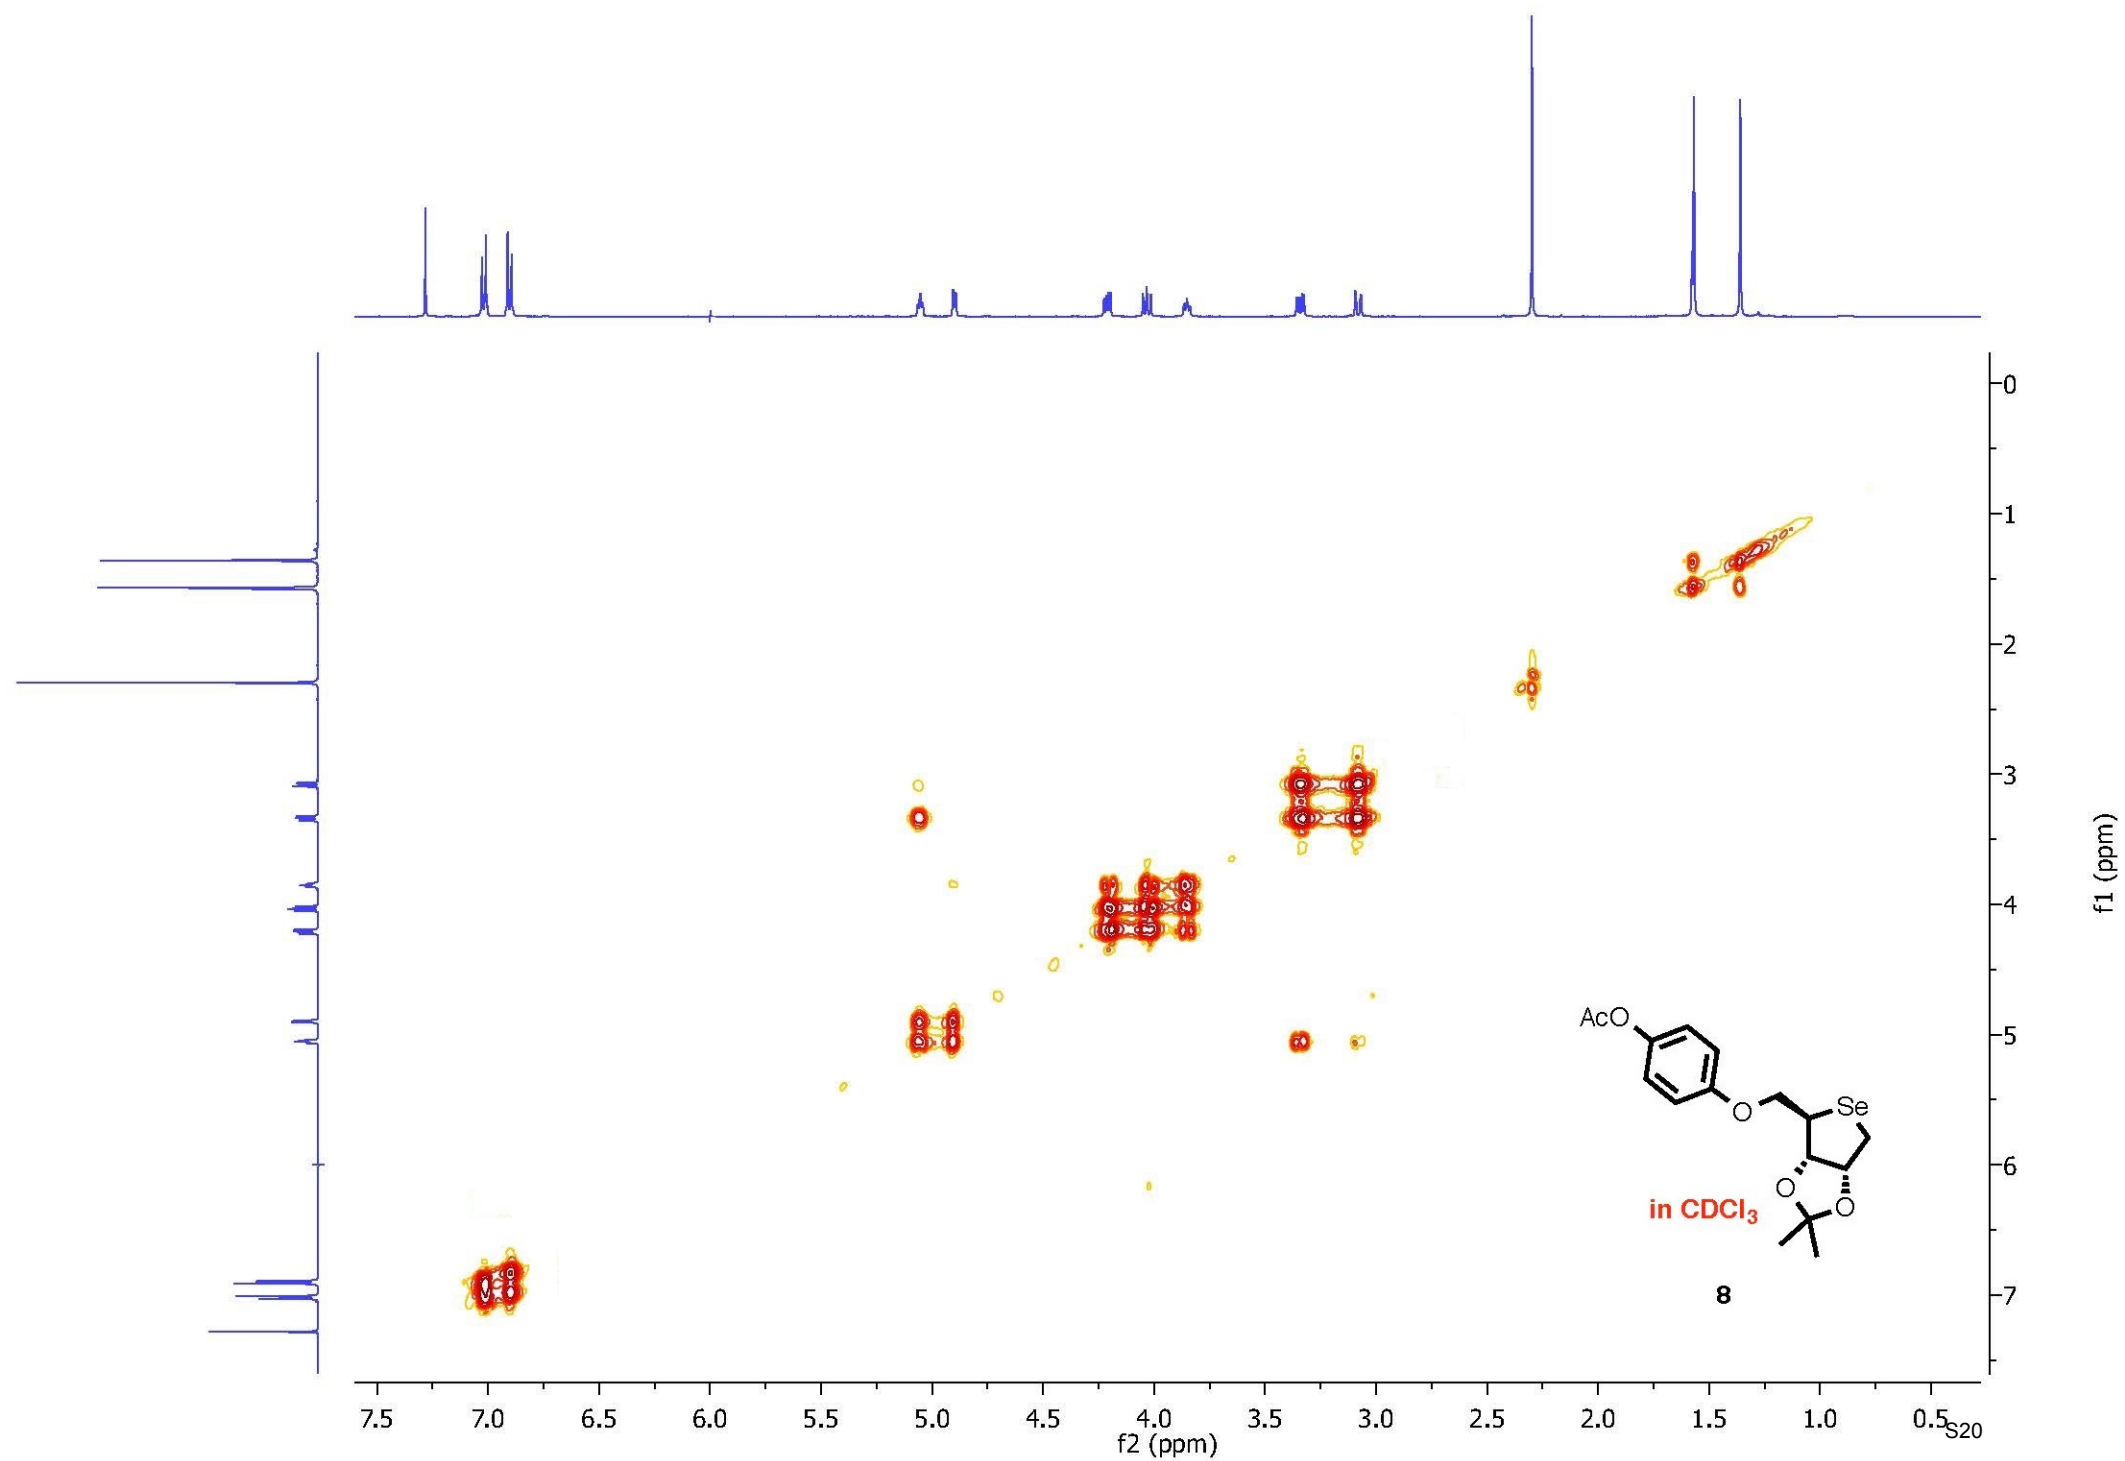

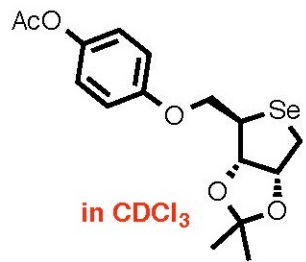

8

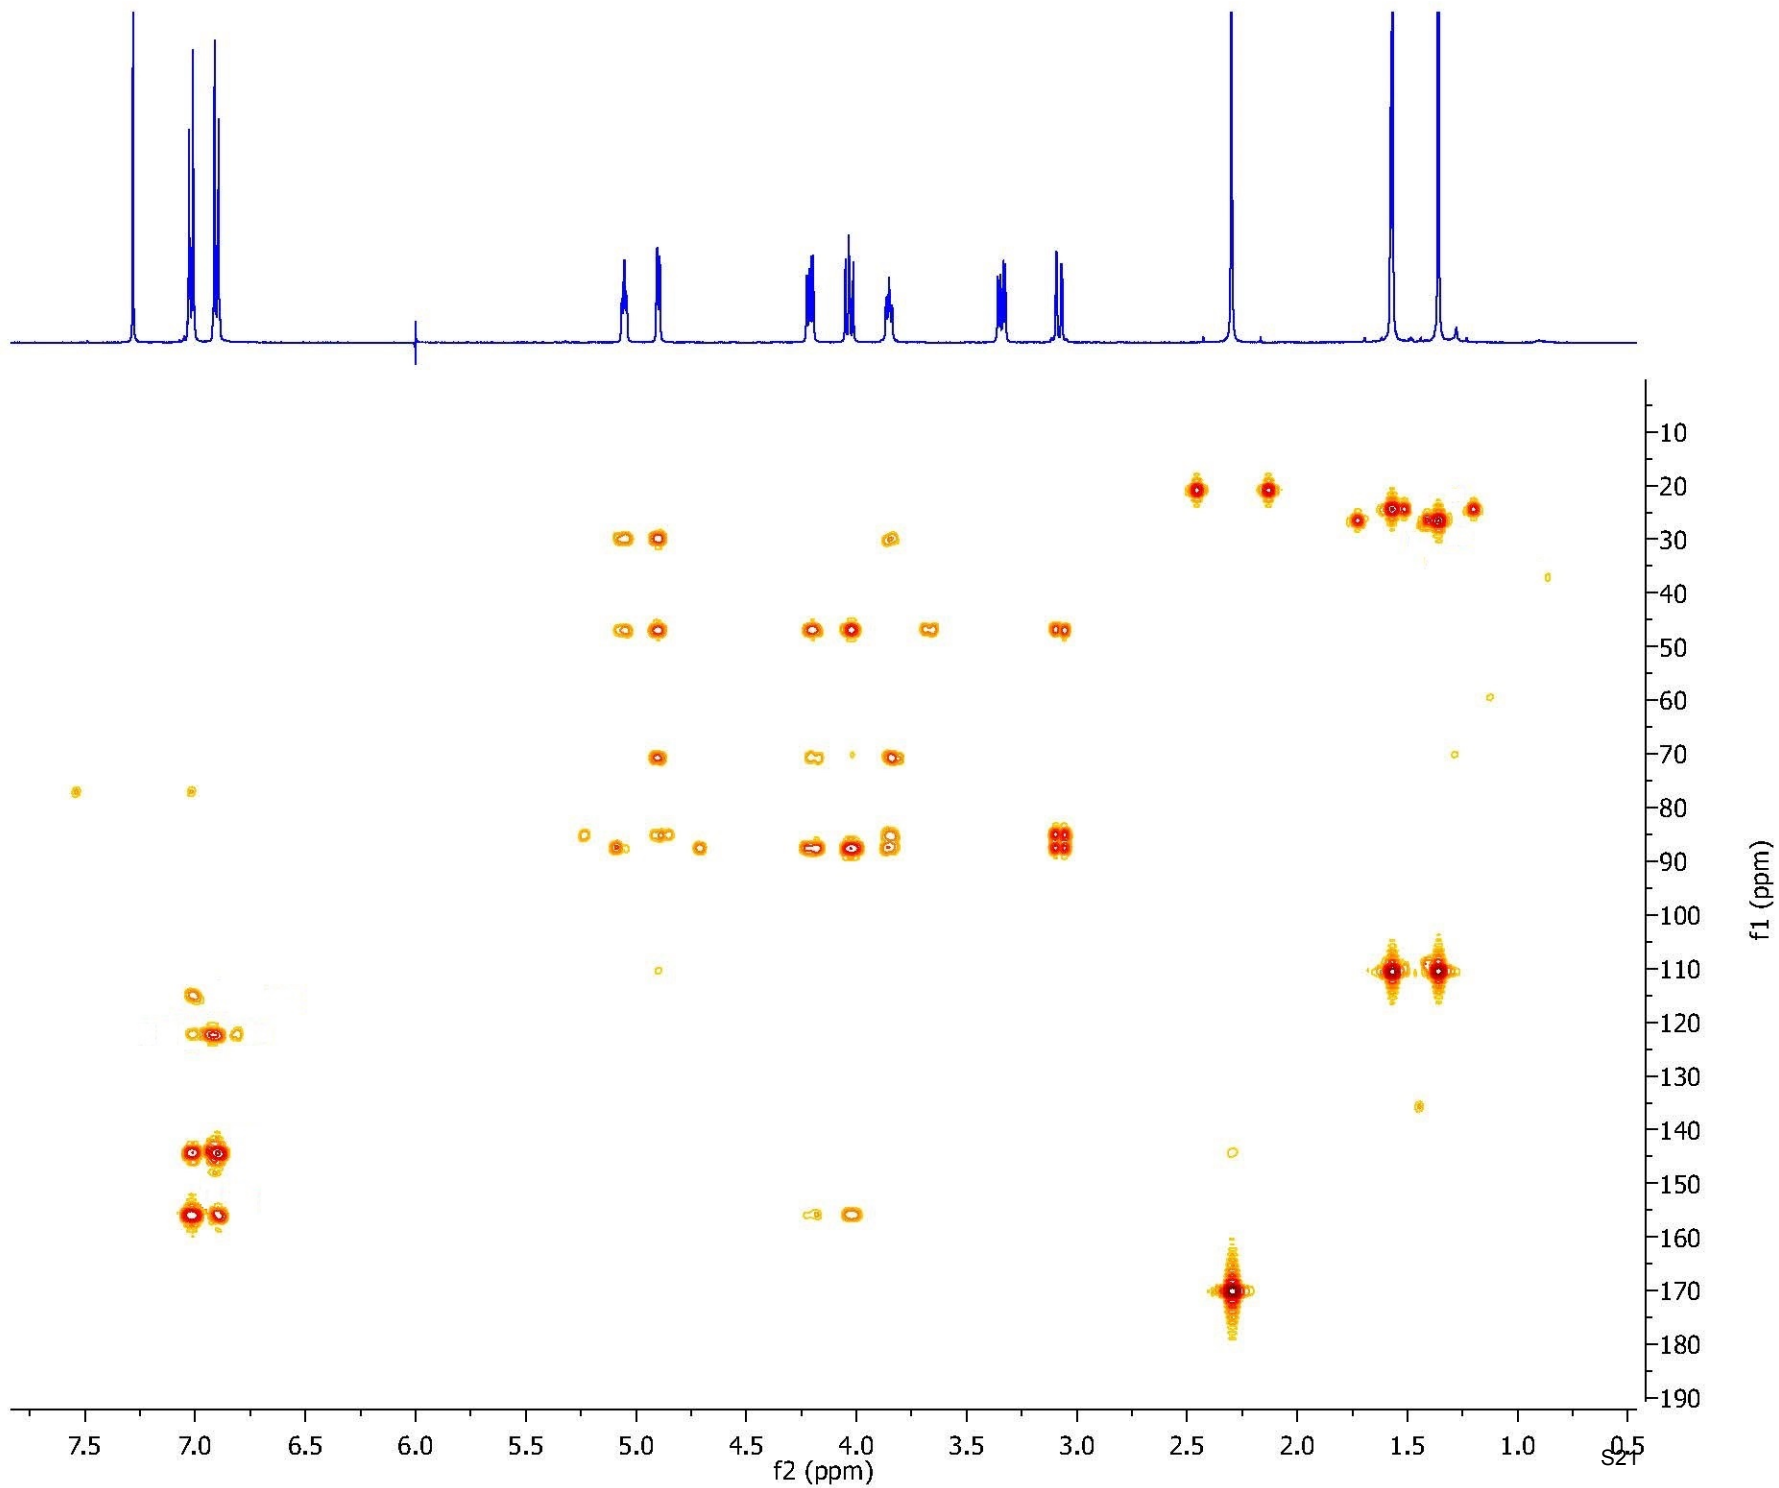

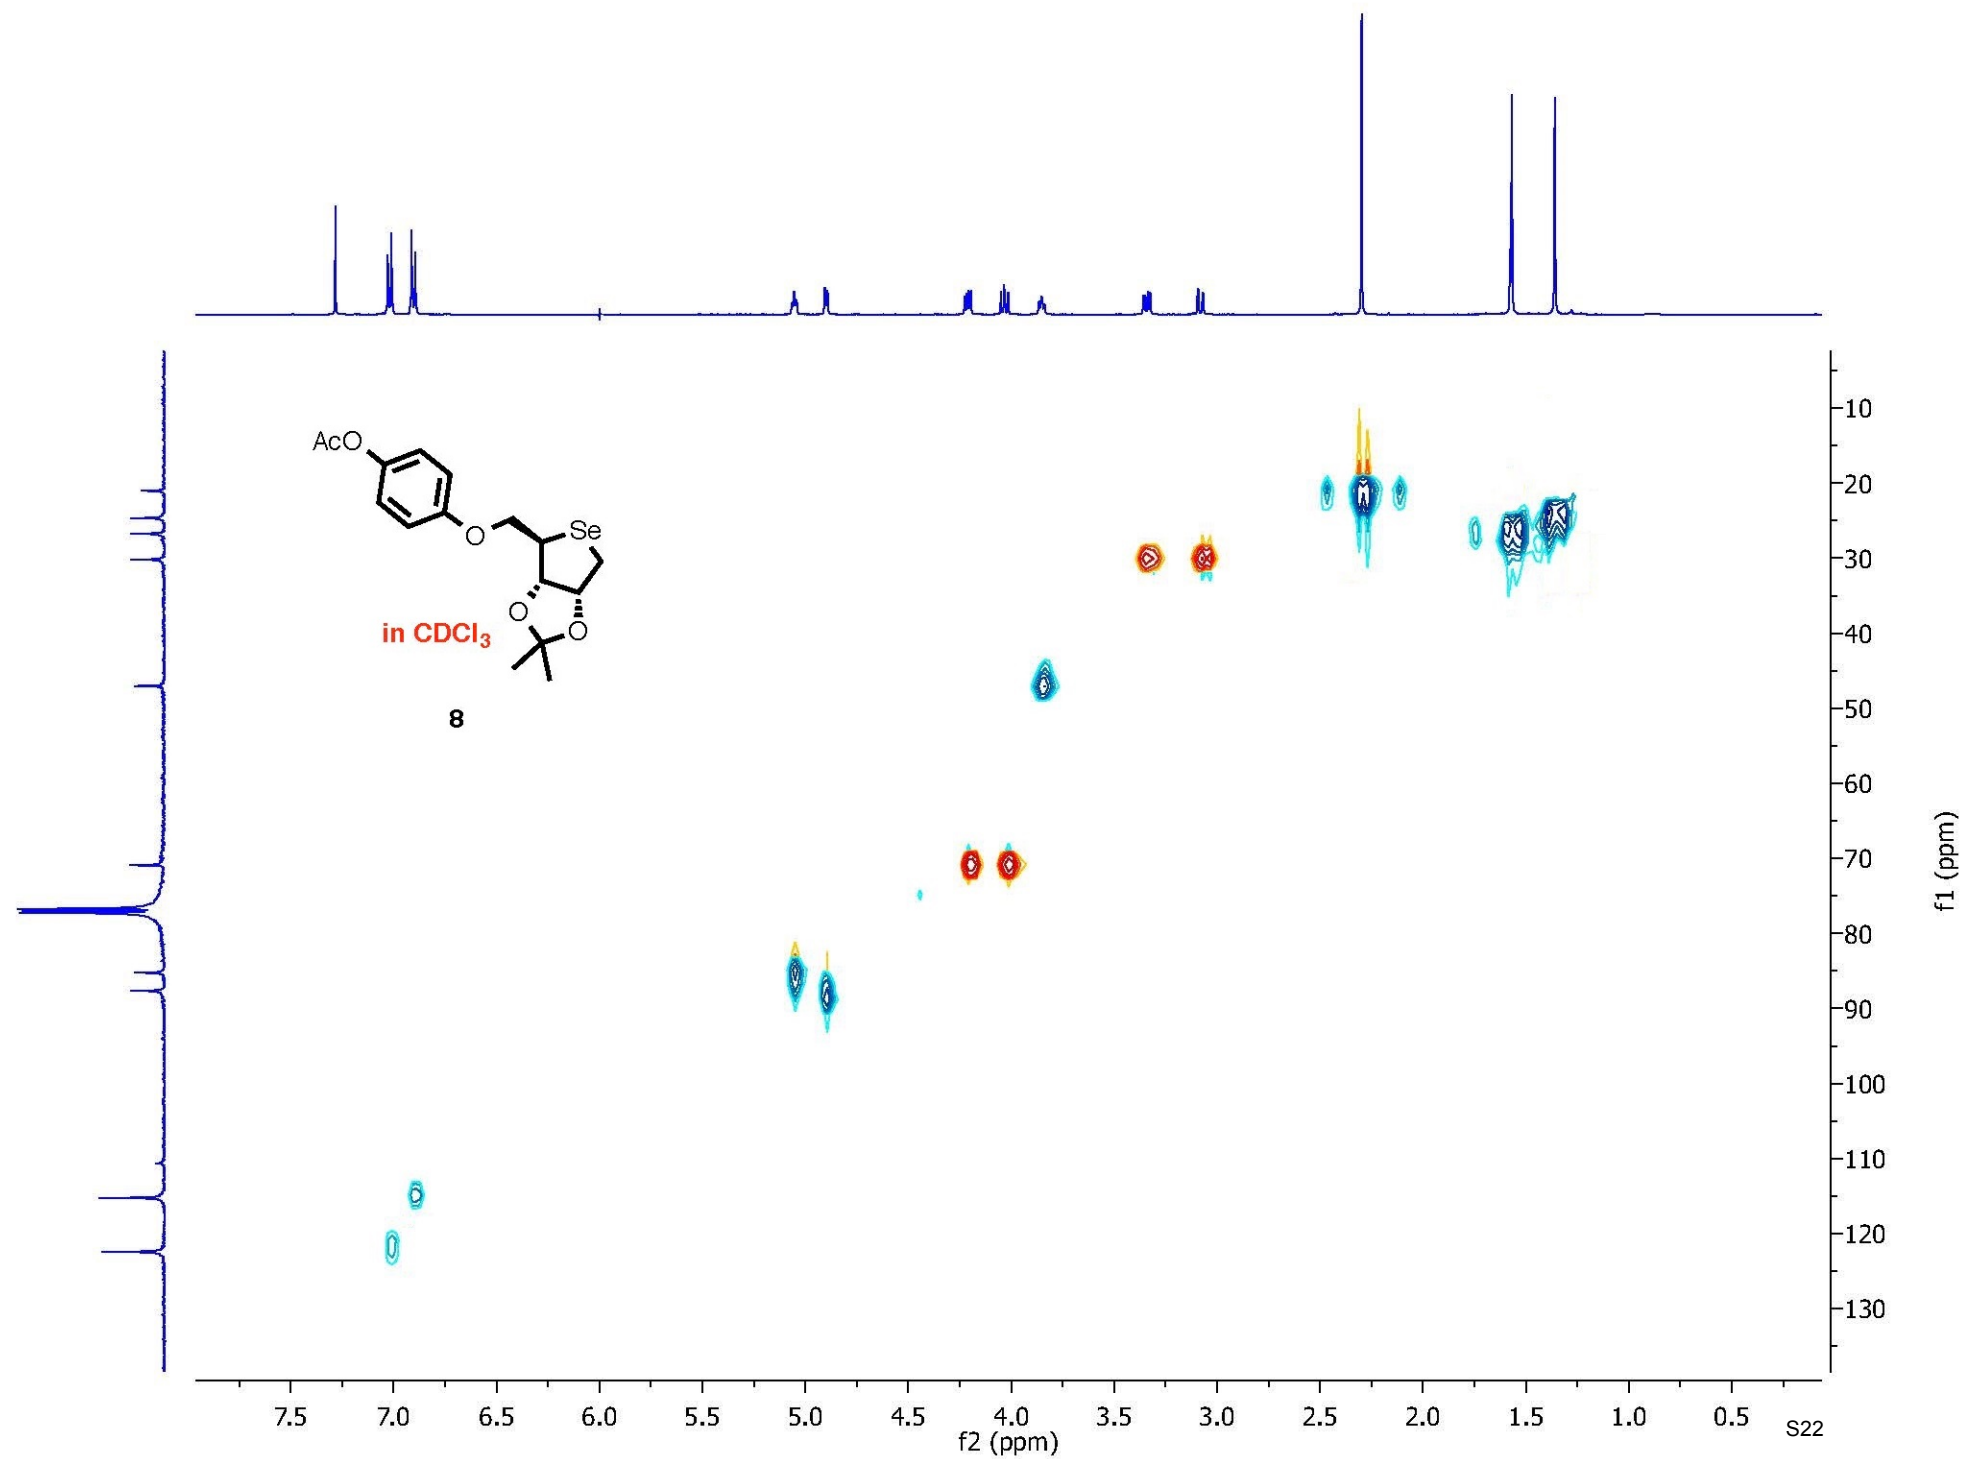

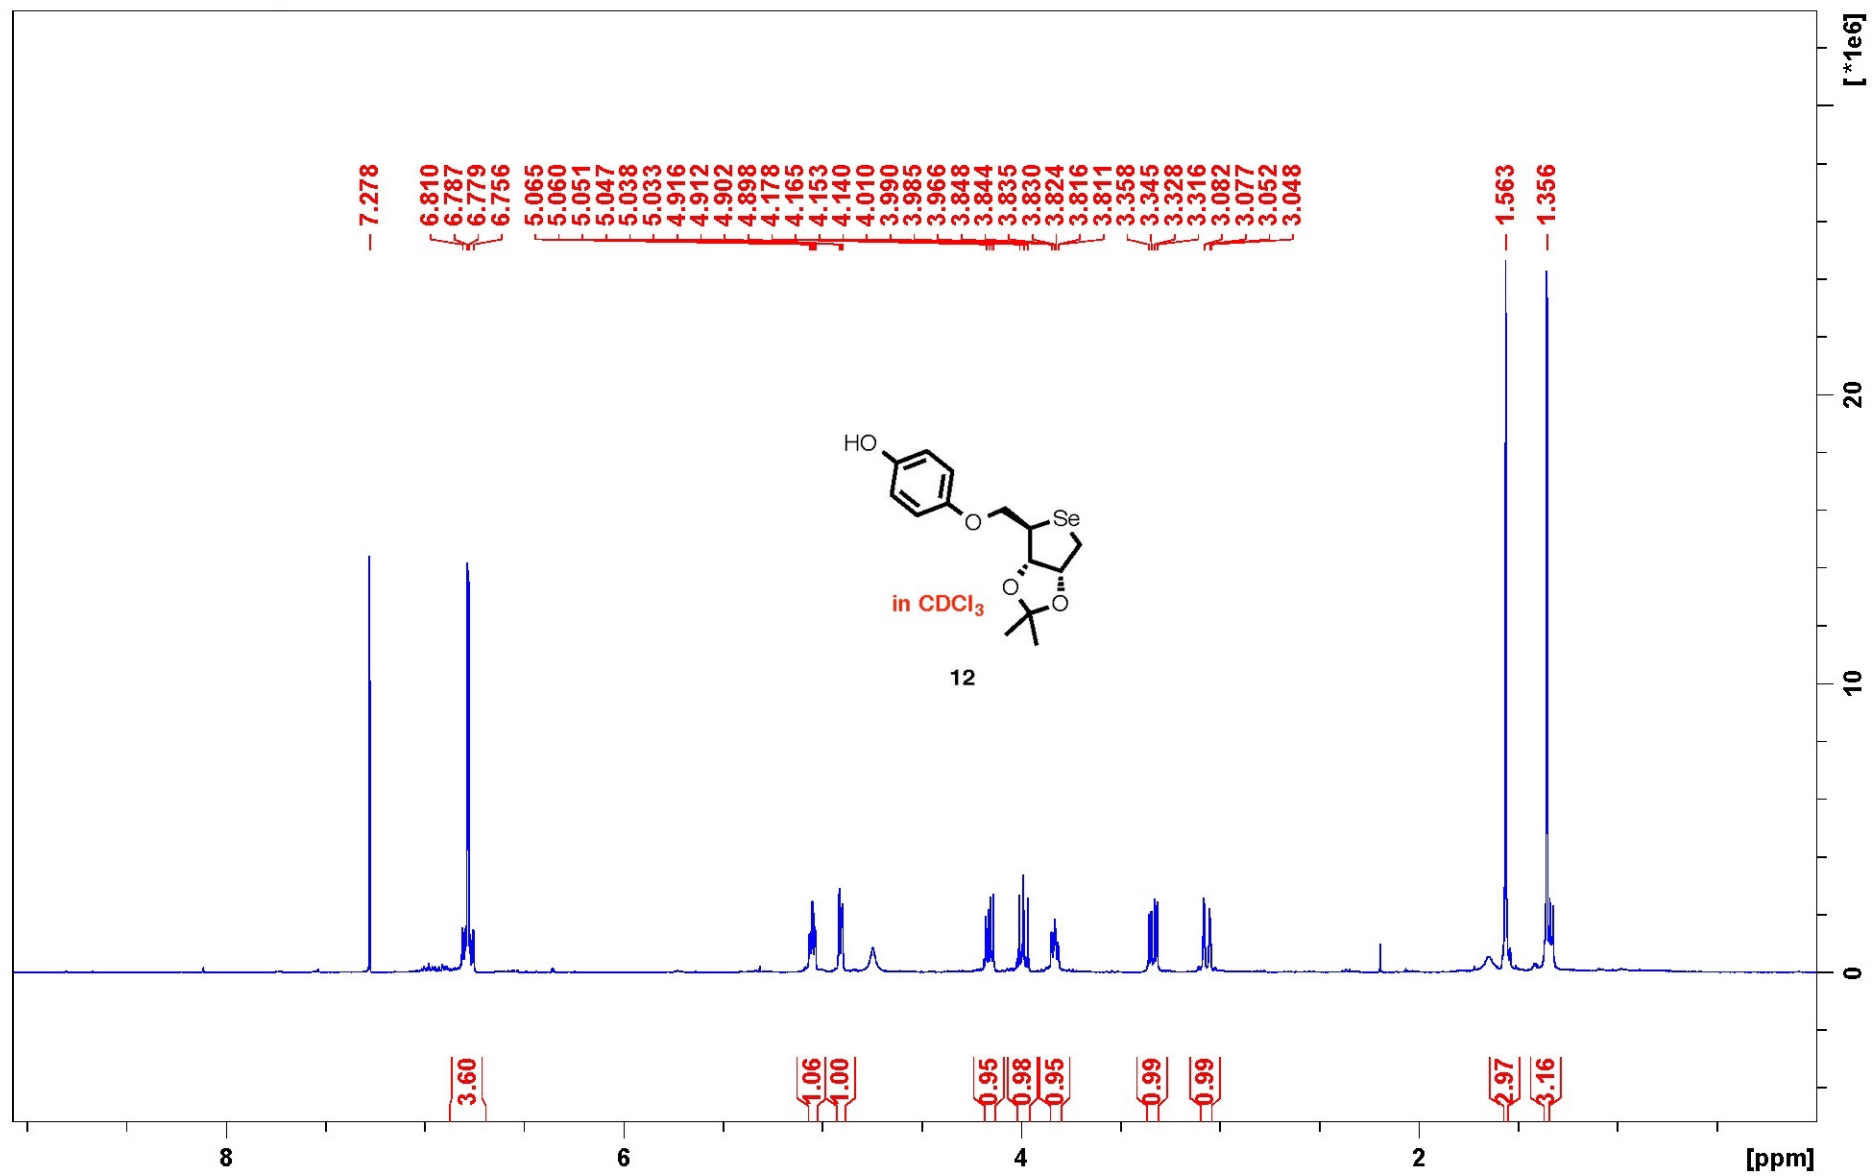

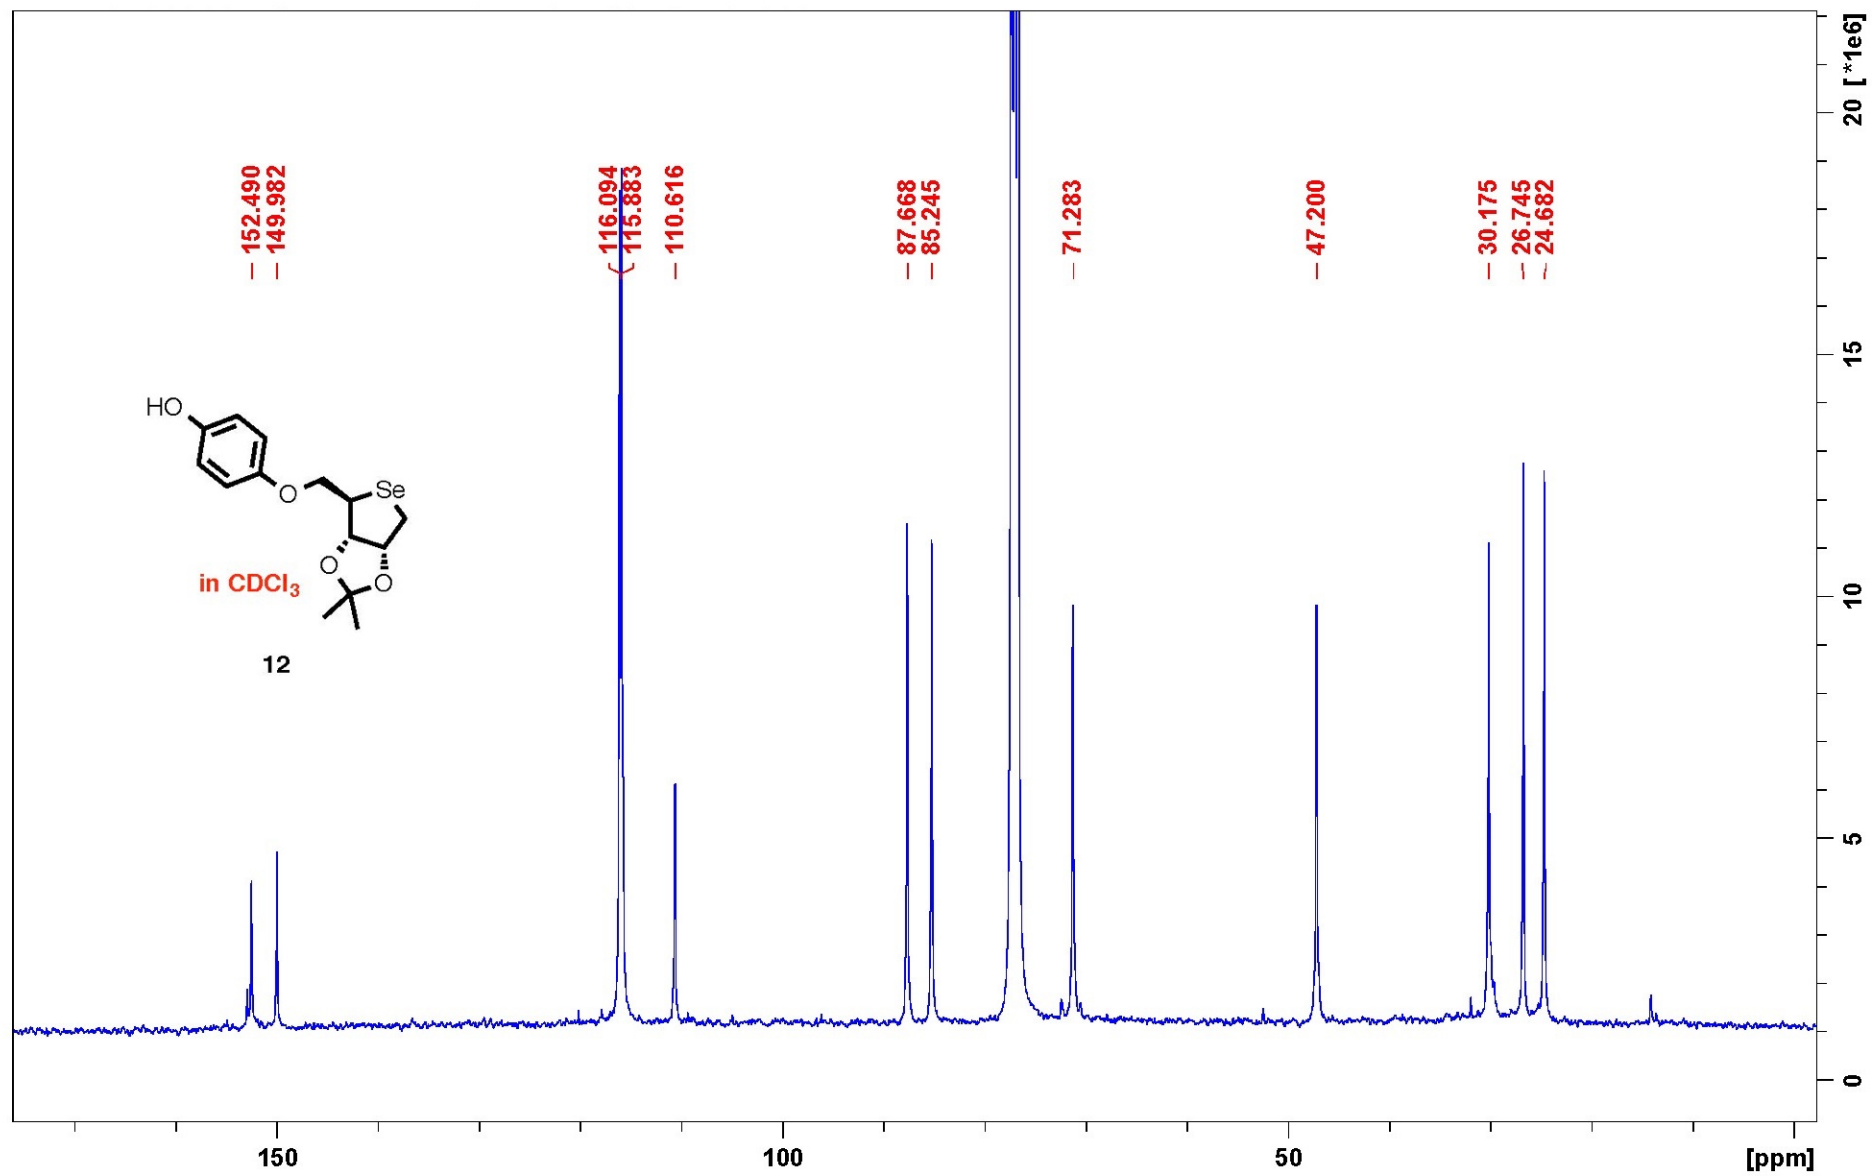

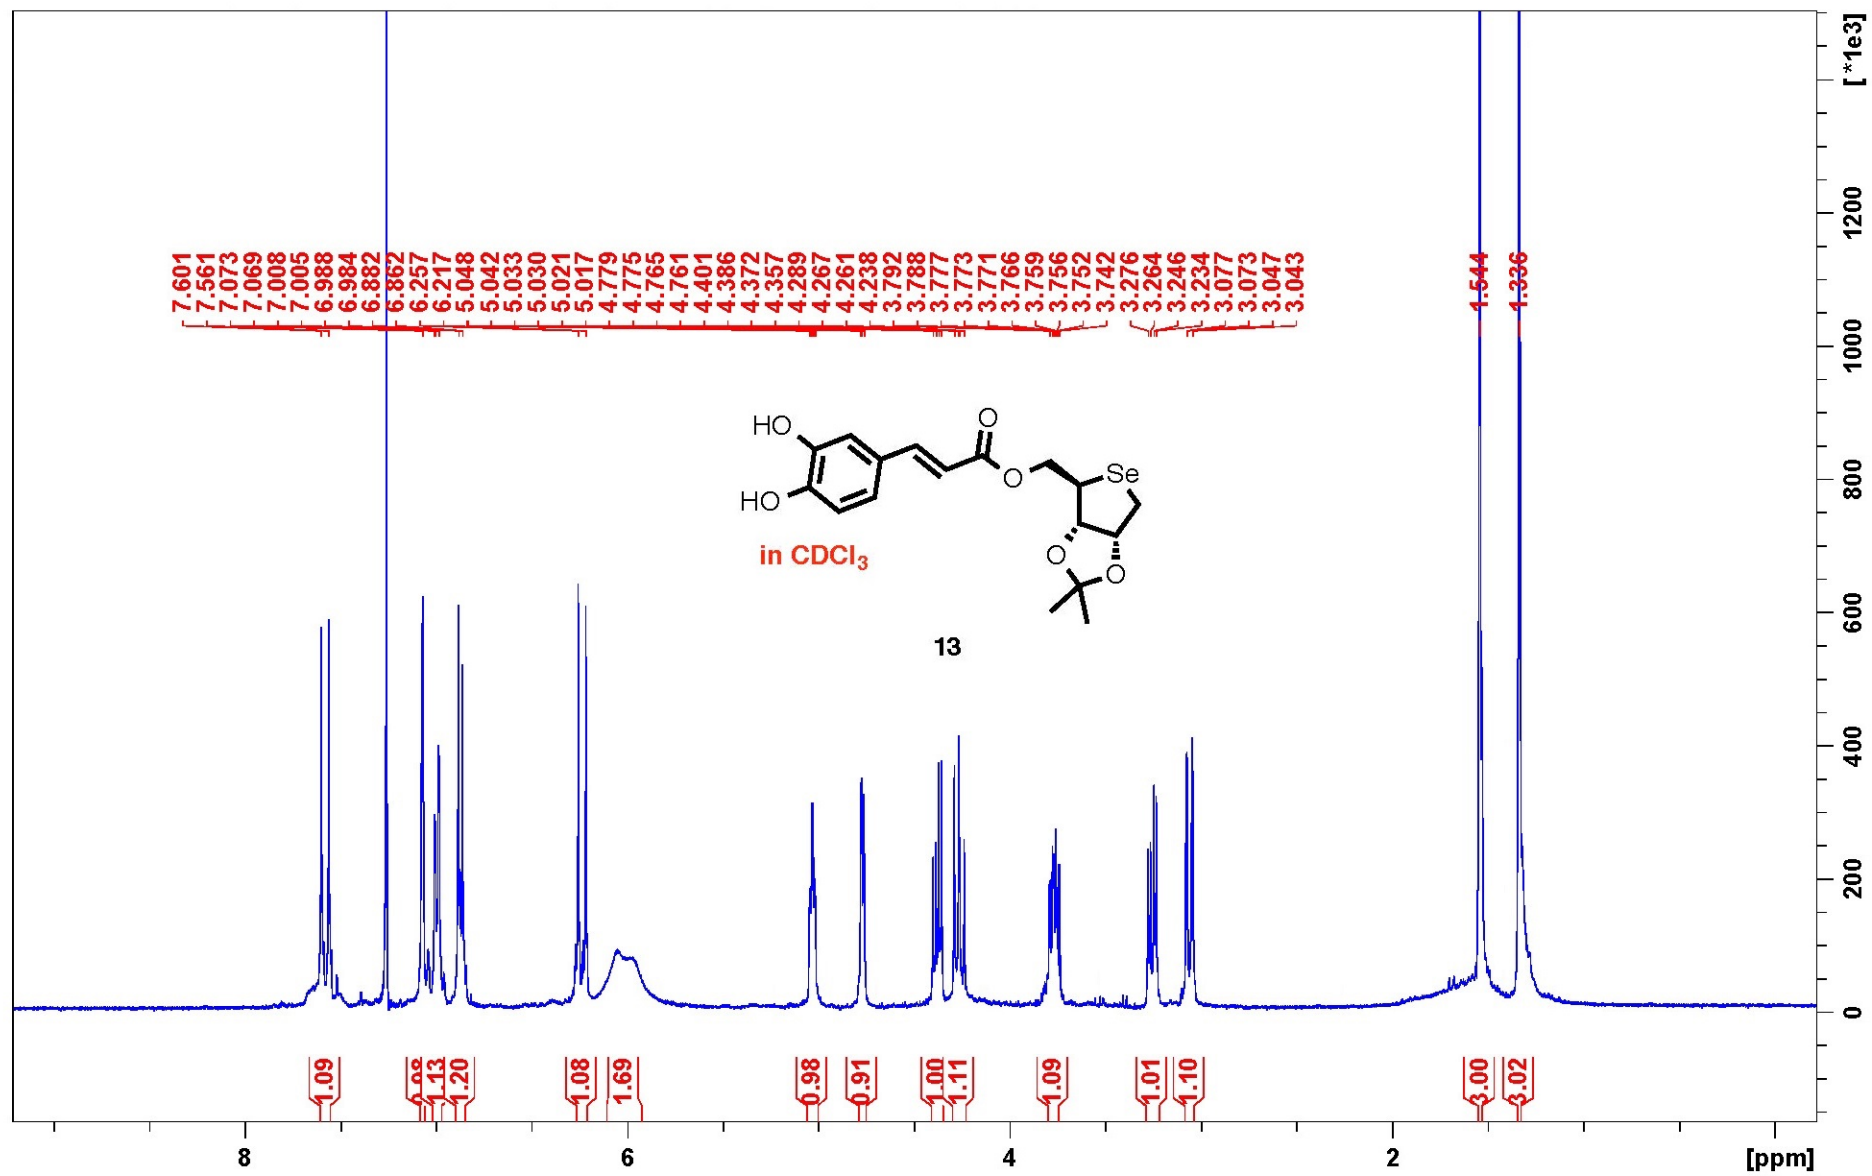



Sample Name  
Date collected

Pulse sequence **CARBON**  
Solvent **cdcl3**

Temperature **28**  
Spectrometer **inova500-inova500**

Study owner **cts**  
Operator **cts**

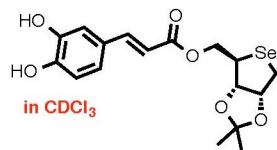

13

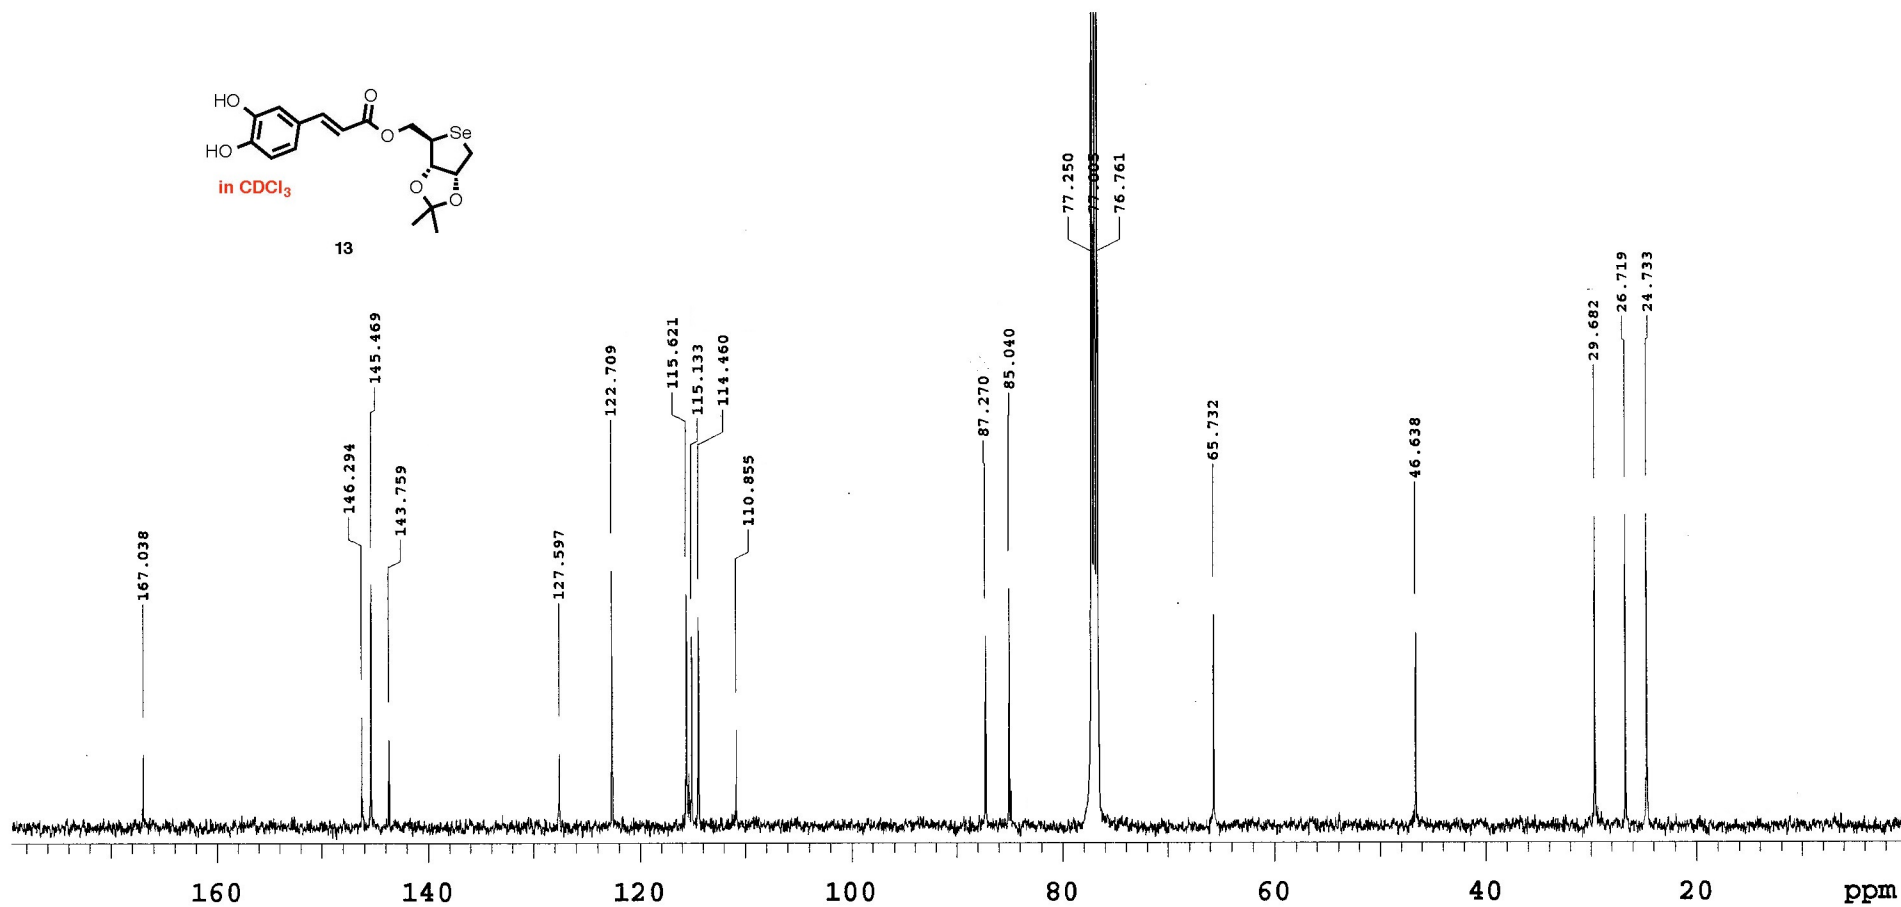

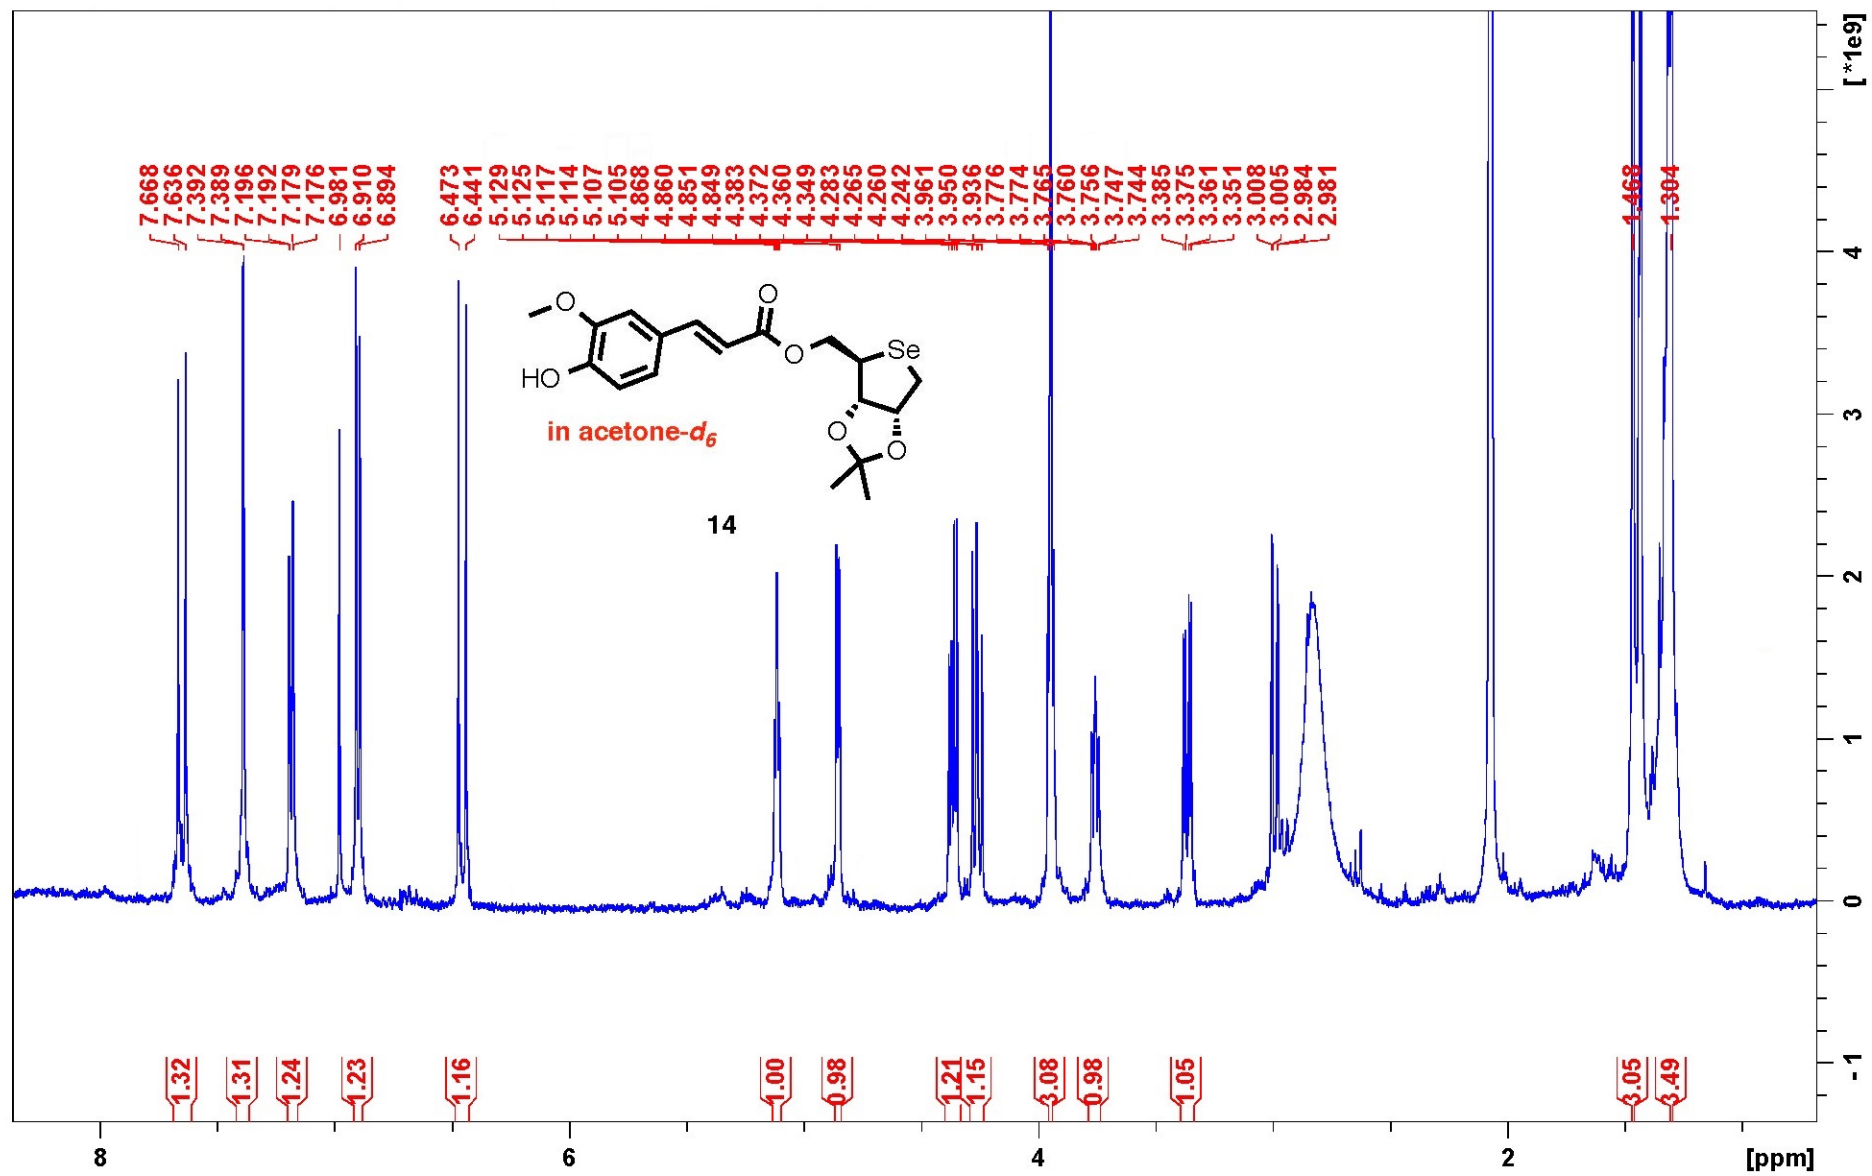

Sample Name  
Date collected

Pulse sequence **CARBON**  
Solvent **cdcl3**

Temperature **25**  
Spectrometer **inova500-inova500**

Study owner **cts**  
Operator **cts**

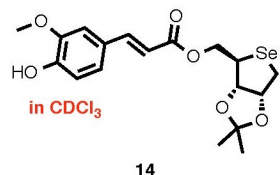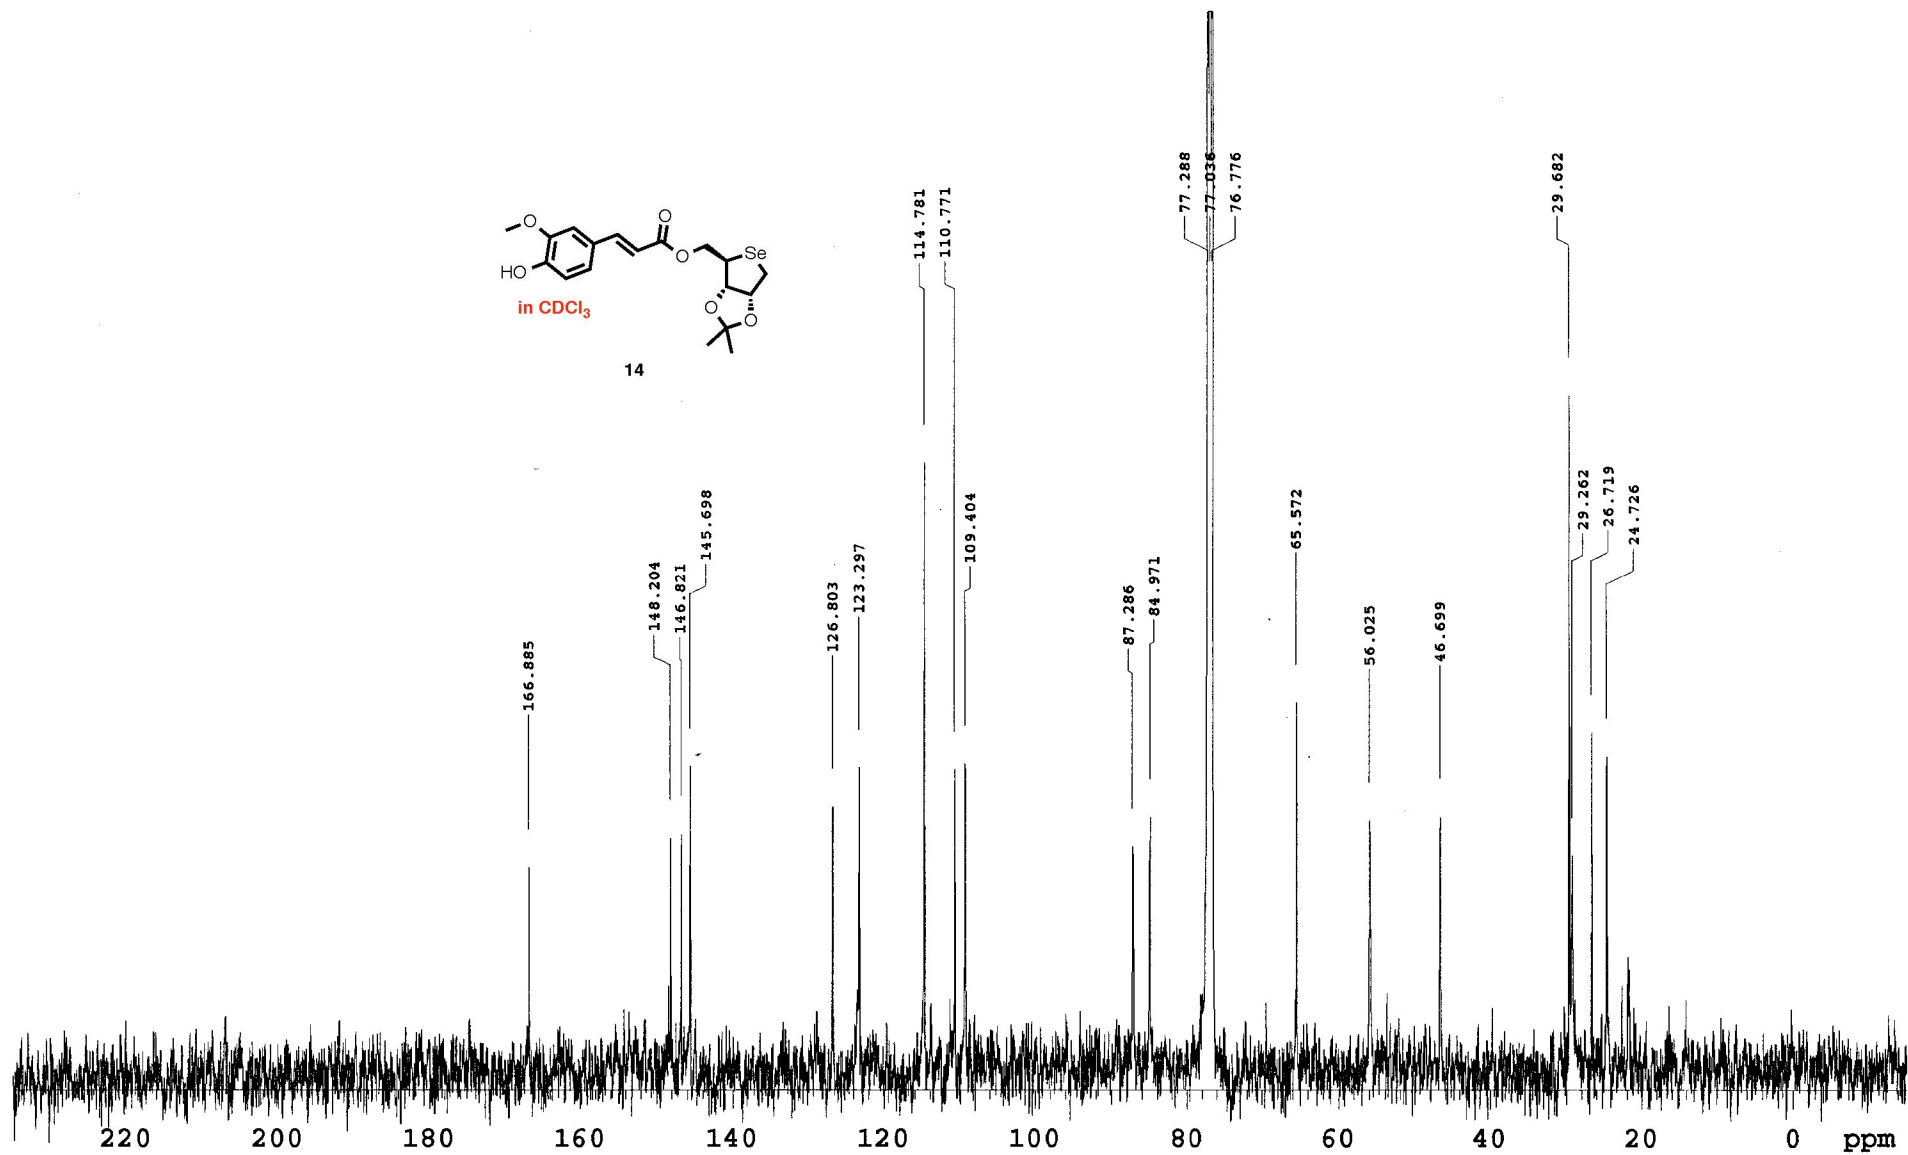

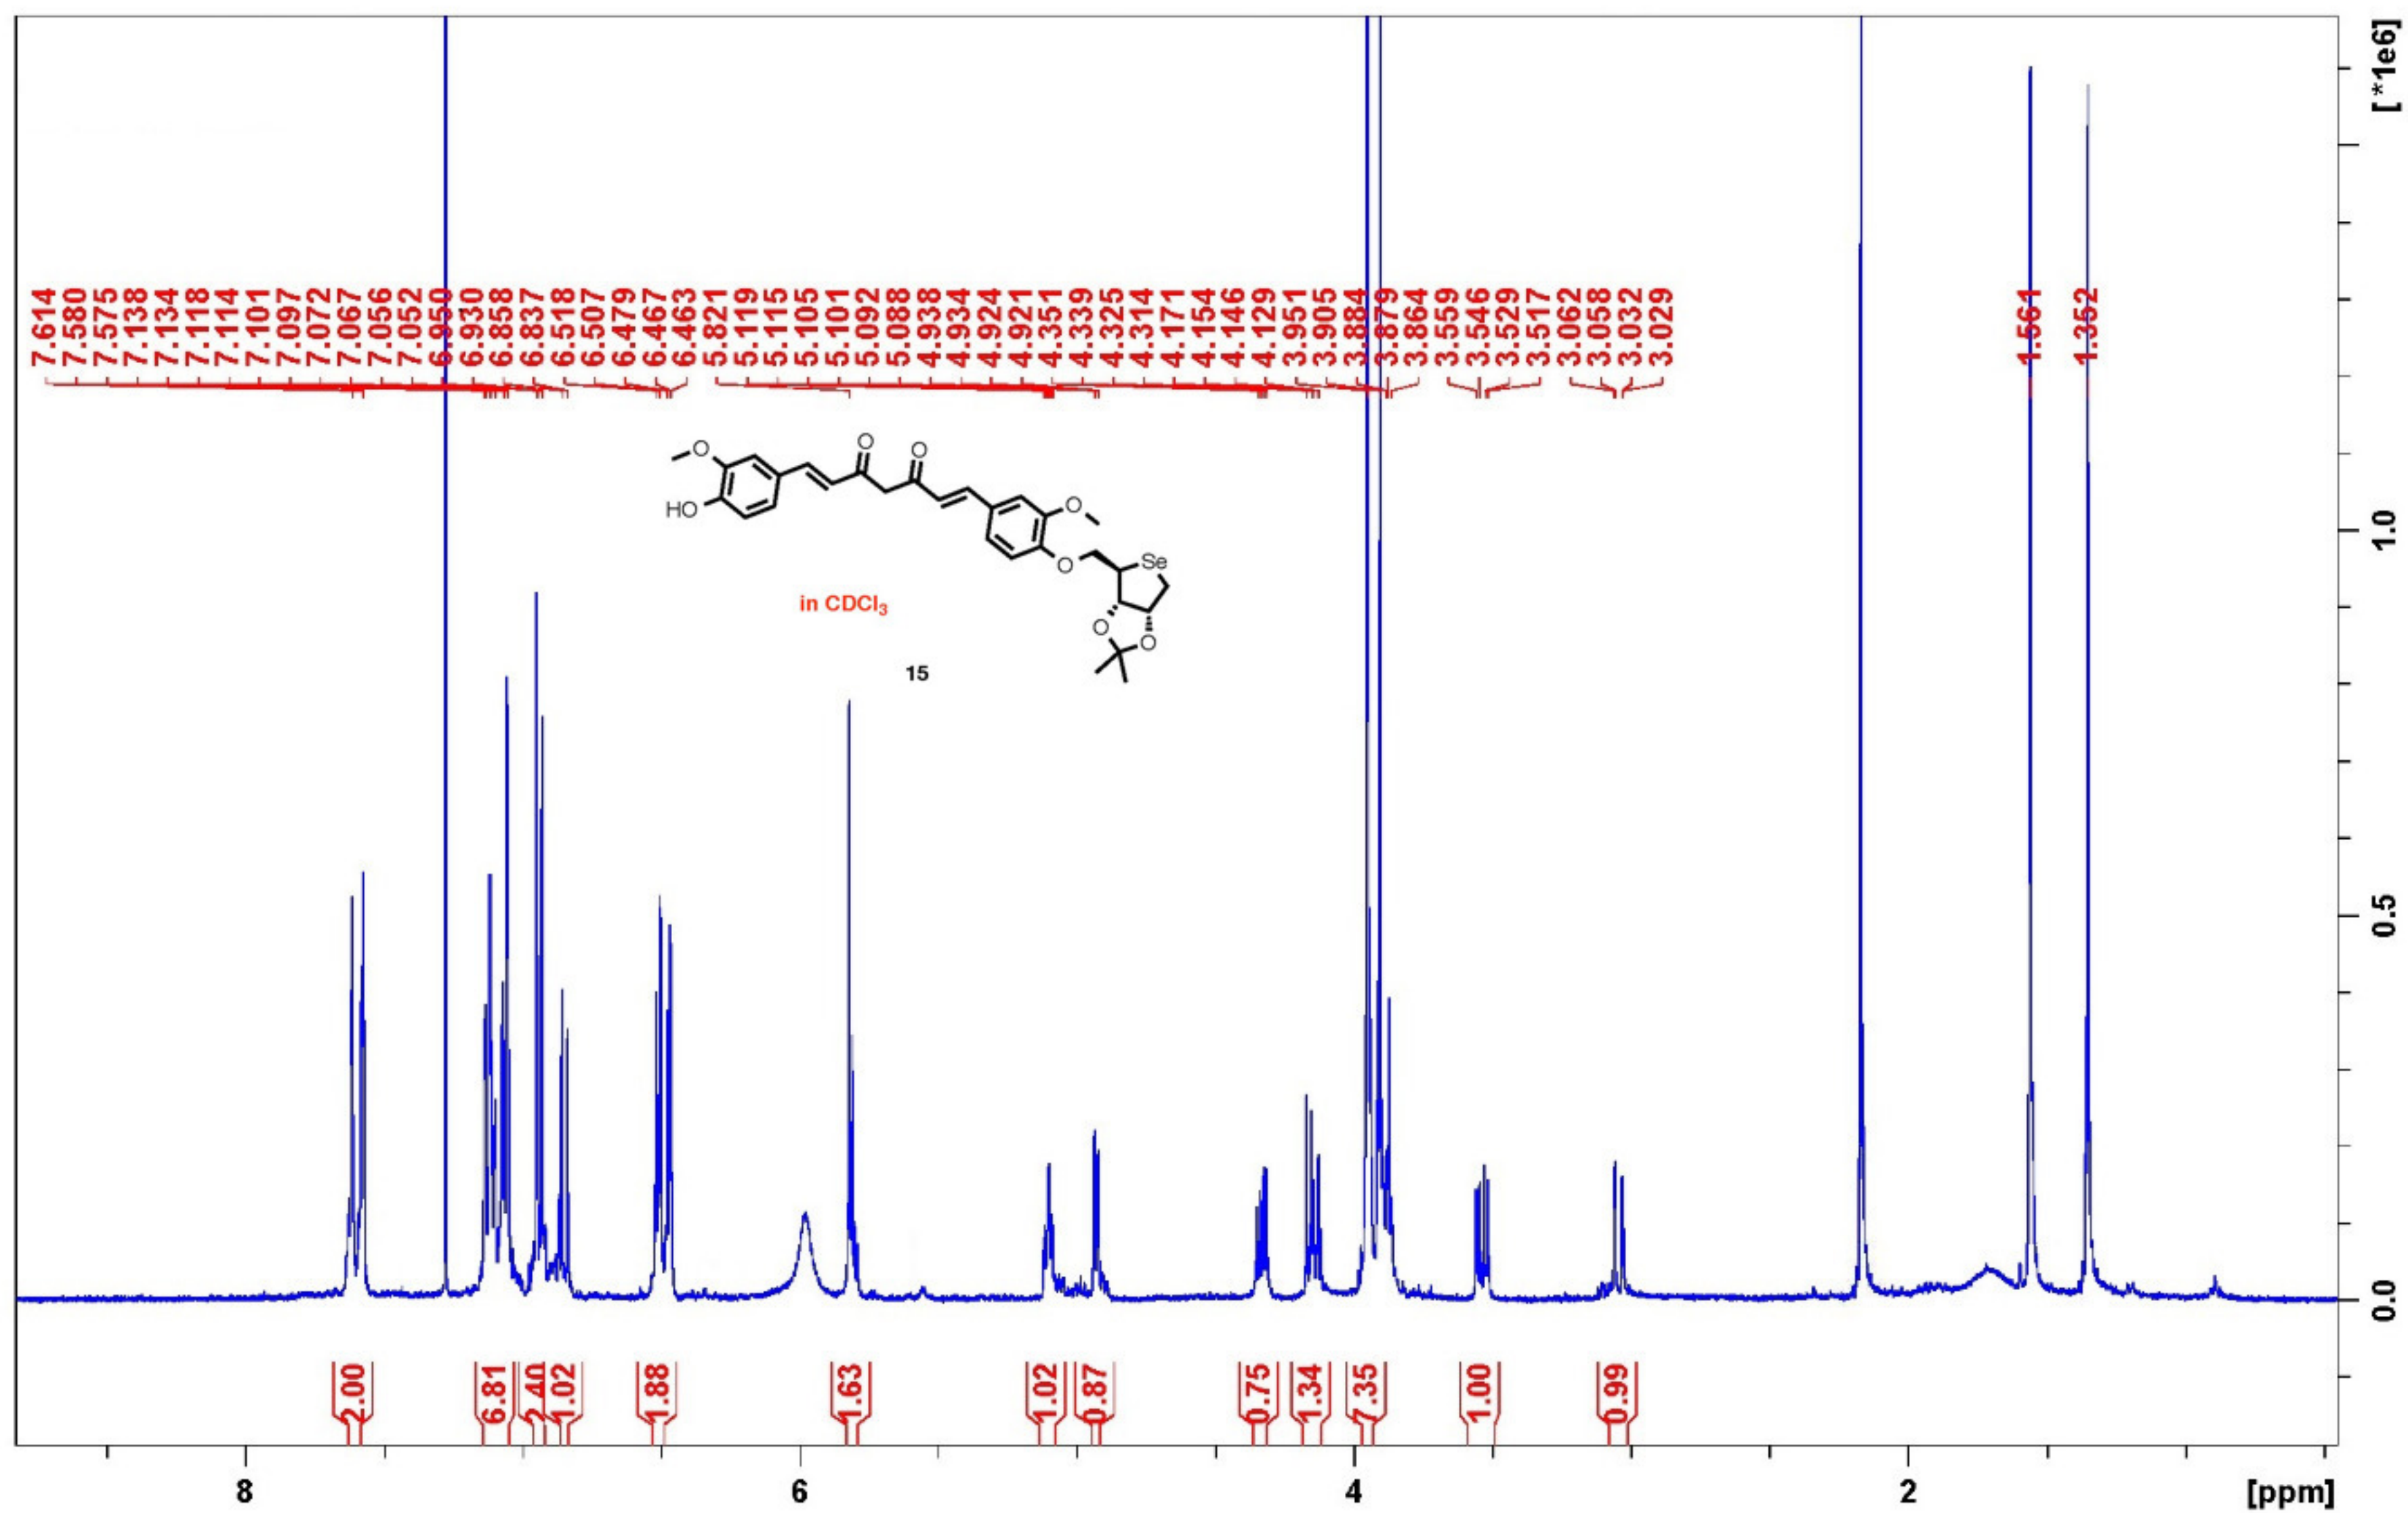

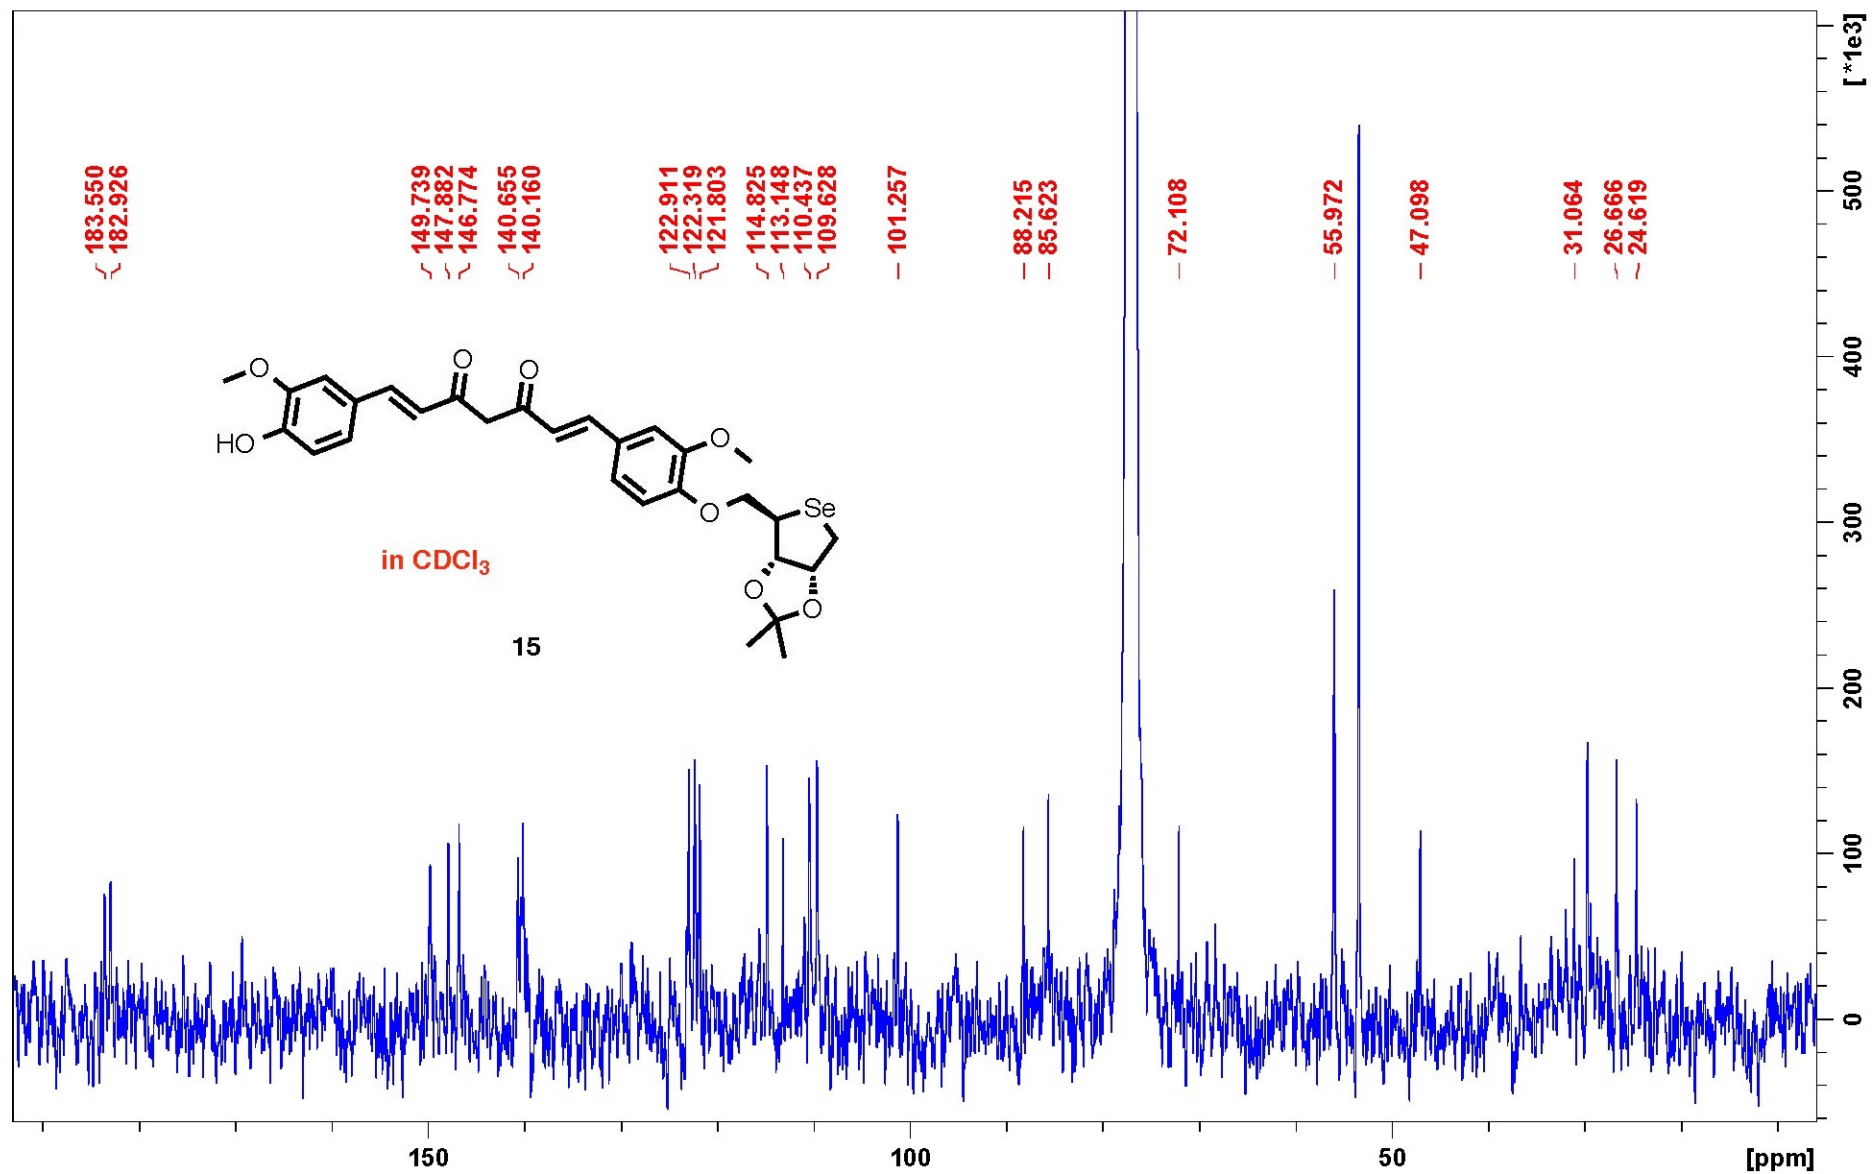

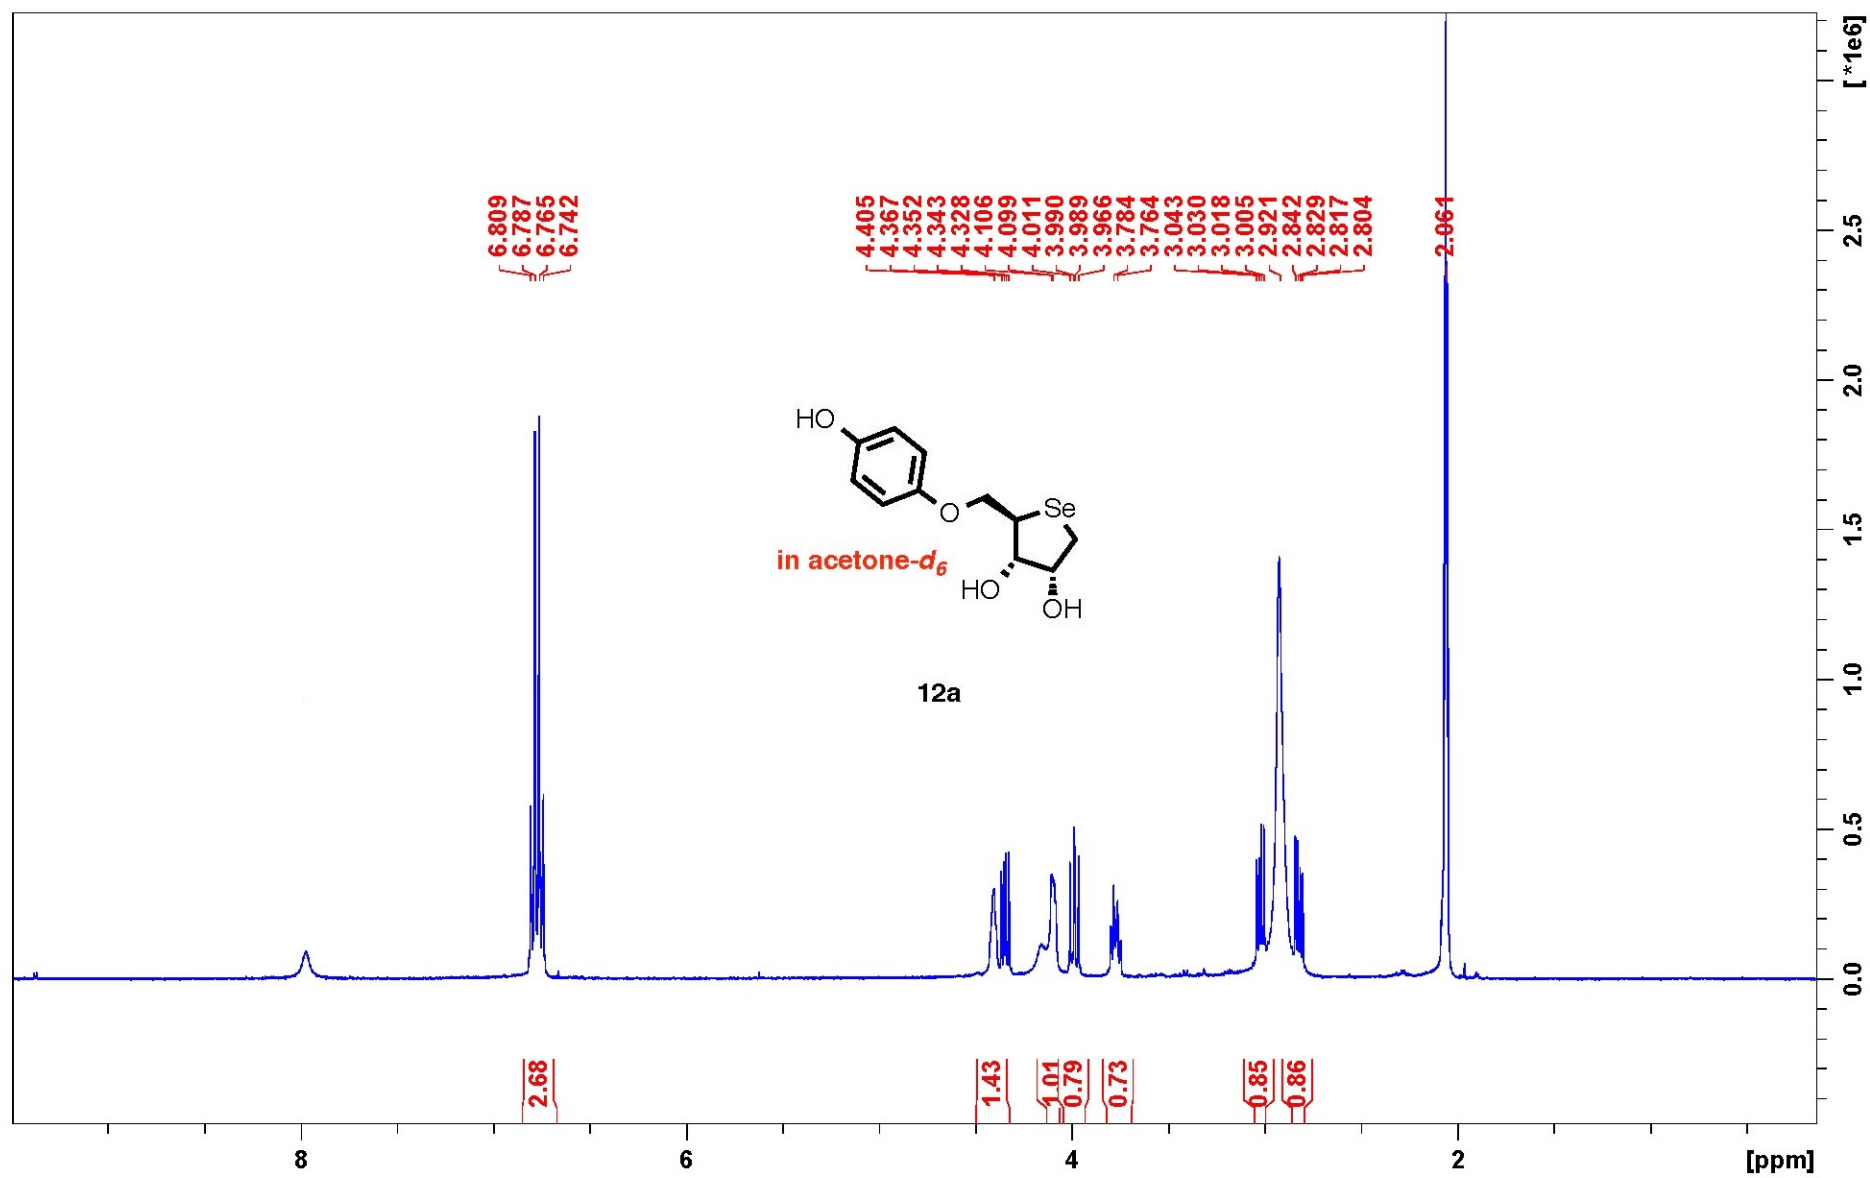



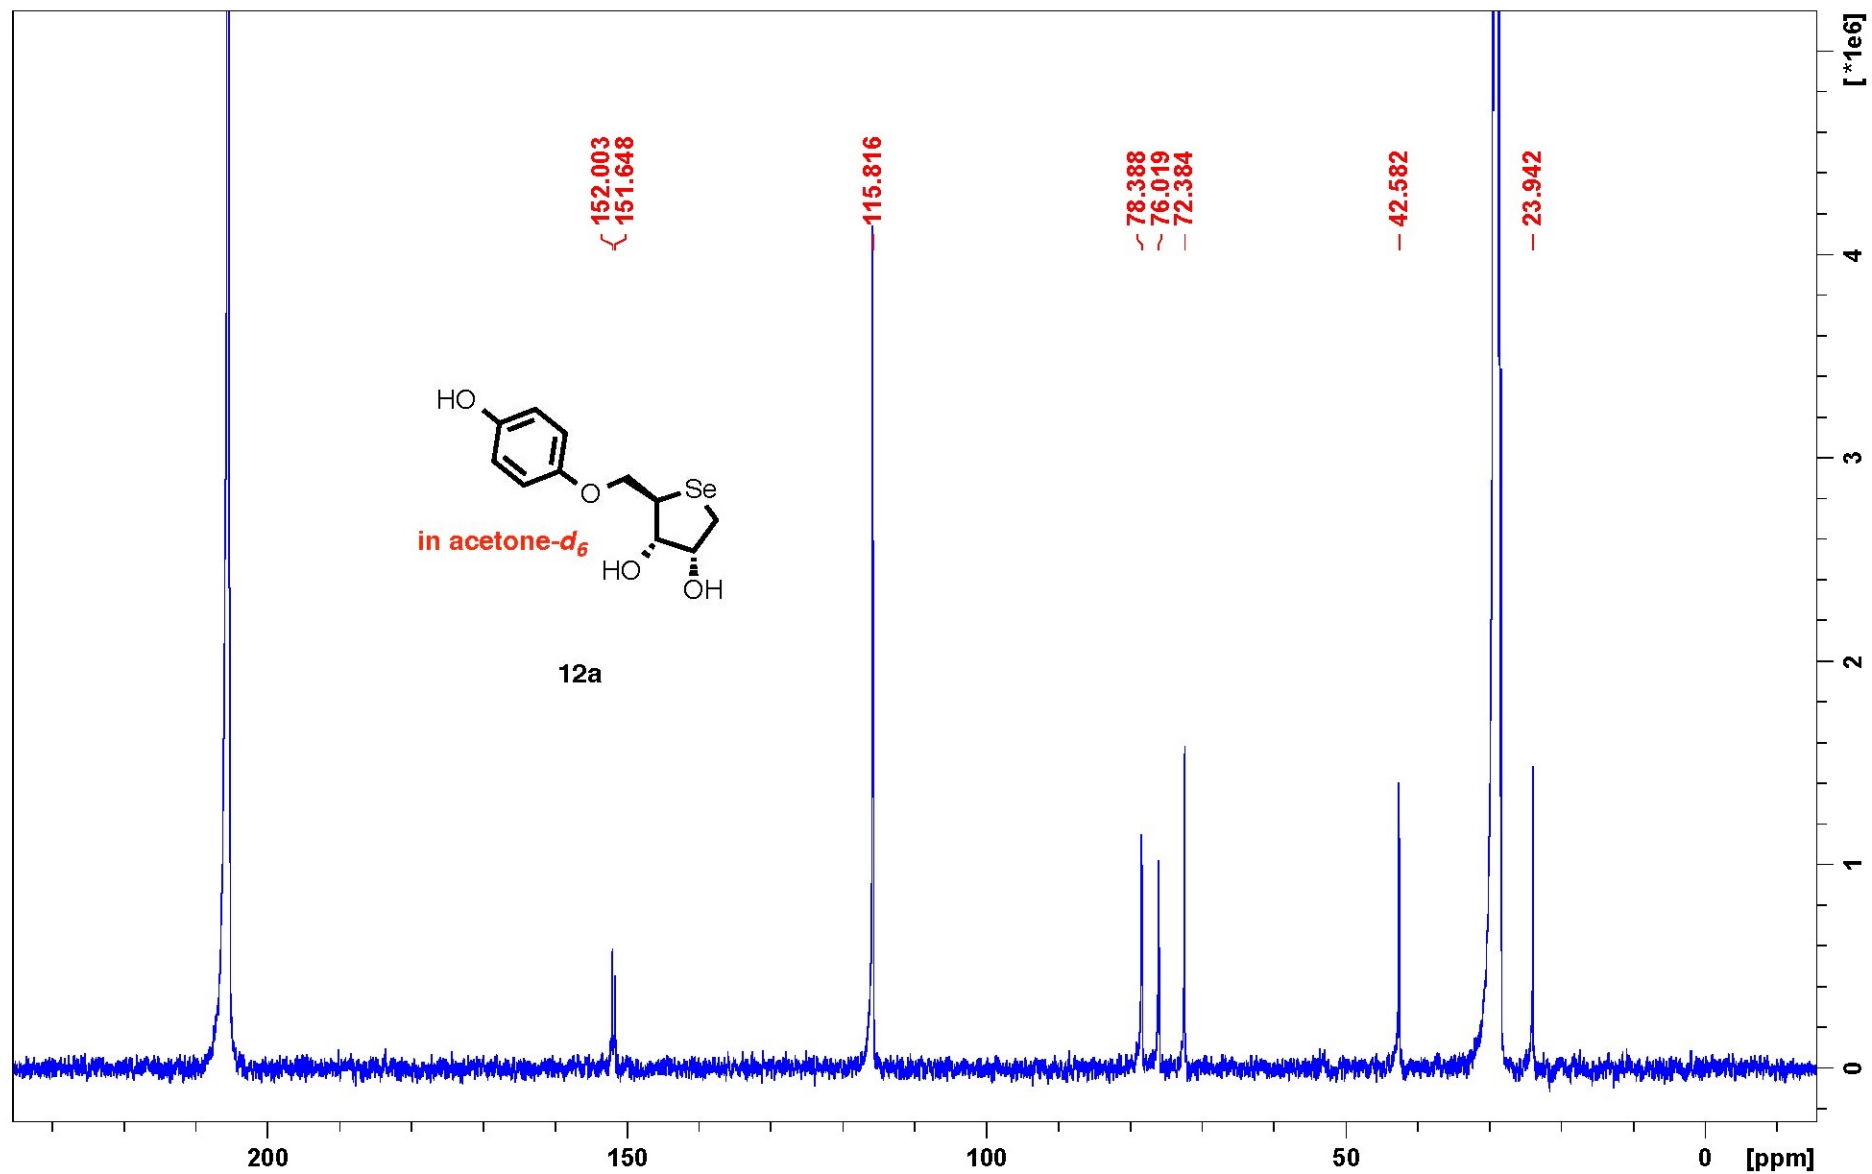



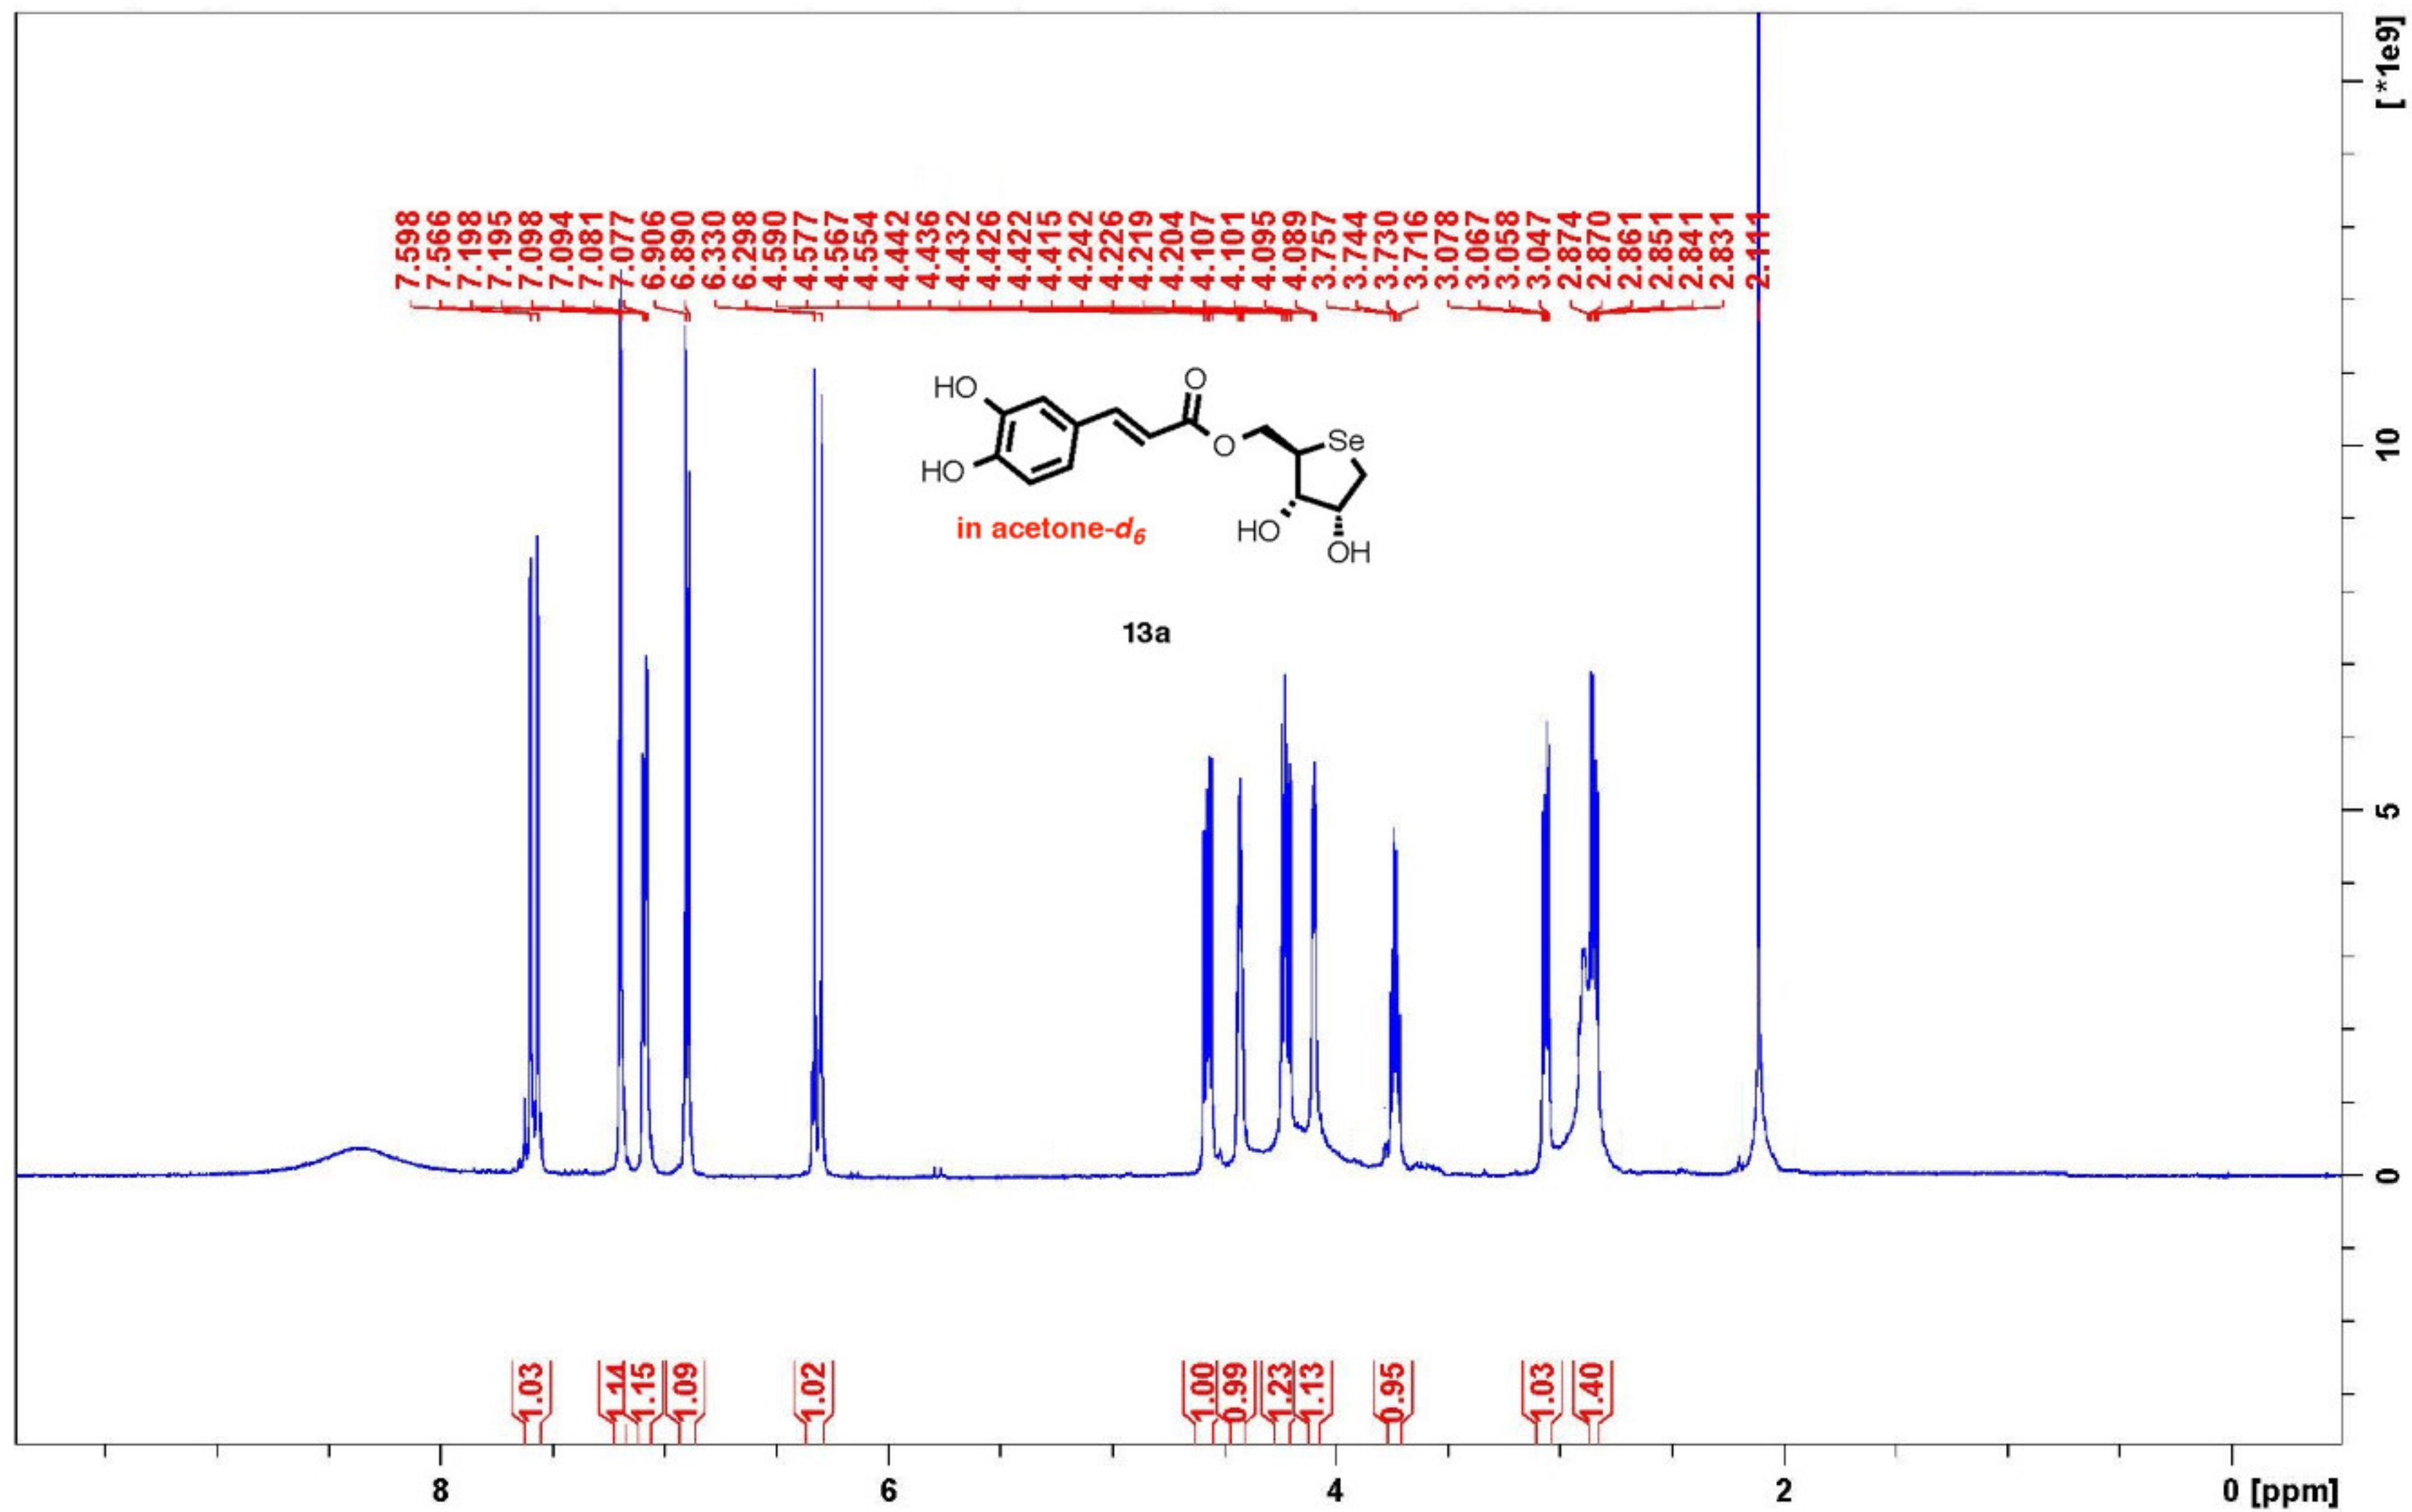

Sample Name  
Date collected

Pulse sequence **CARBON**  
Solvent **acetone**

Temperature **25**  
Spectrometer **inova500-inova500**

Study owner **cts**  
Operator **cts**

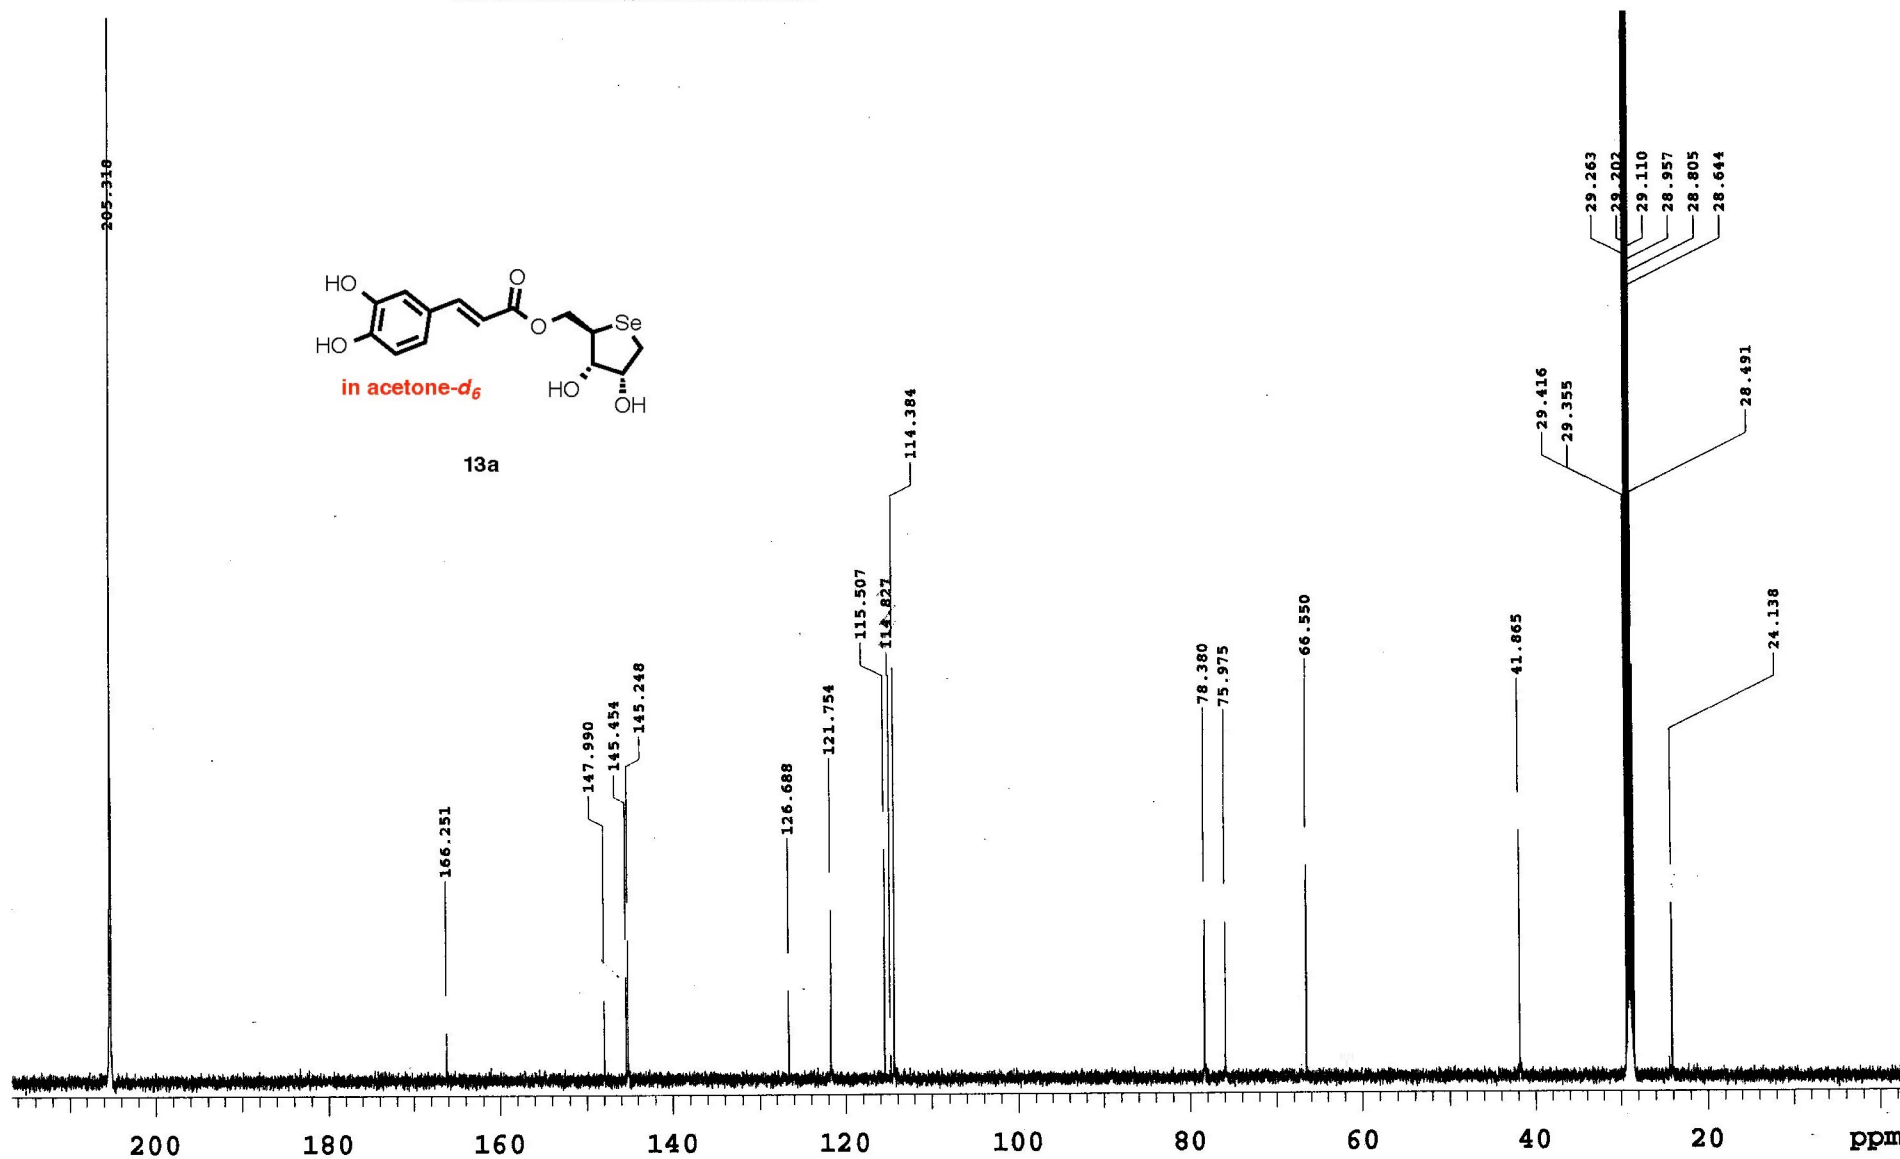

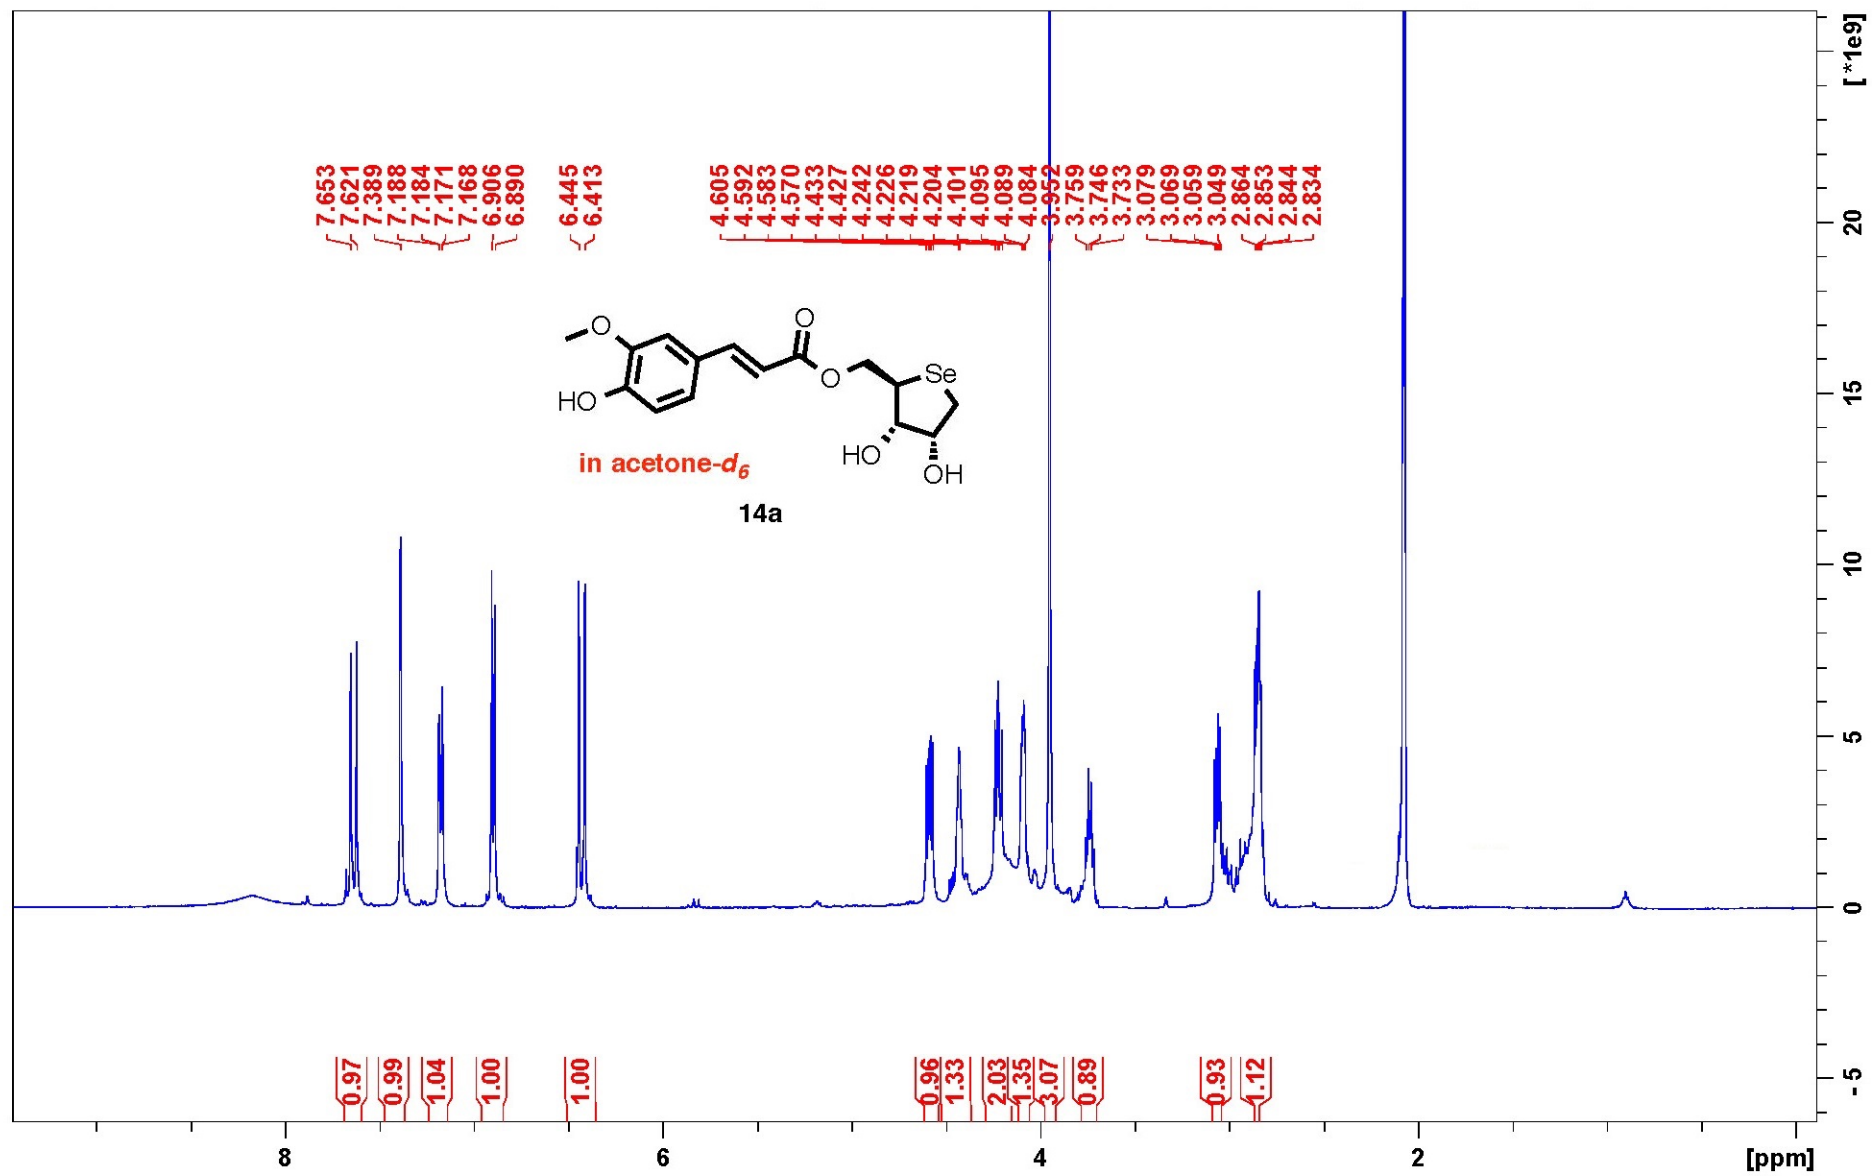

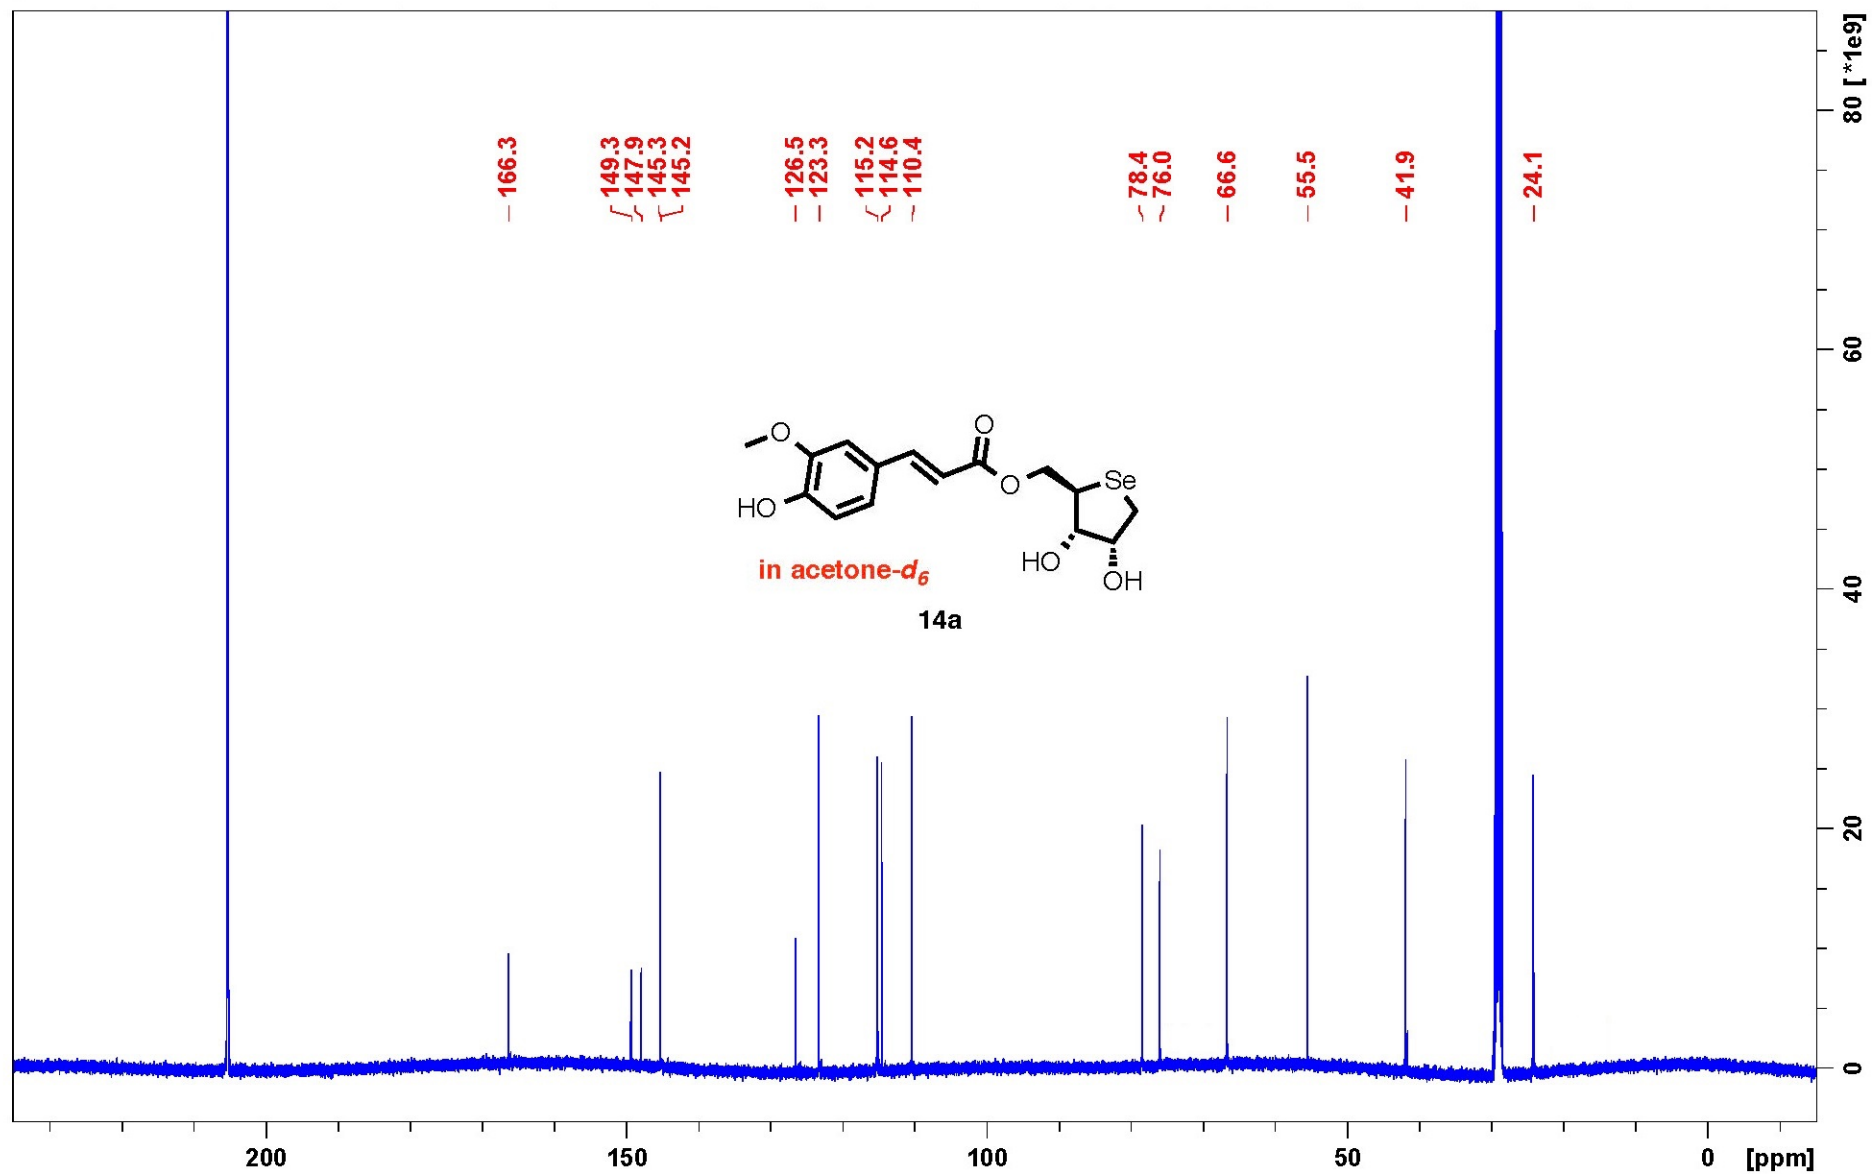

Supplement: s1 [file s1]
